# Supplementary material for: Contribution à l'étude de la thermogenèse comparée chez trois espèces de rongeurs du dessert, Atlantoxerus getulus, Ctenodactylus vali et Jaculus orientalis : Etude pharmacologique, résistance à l'hyperthermie et mesure des catécholamines surrenaliennes
Source: Royal Society of Chemistry journal article supplement (doi:10.1039/c9ra09776g), 1988-07-15
Supplement: c9ra09776g1.pdf [file c9ra09776g1.pdf]

## **Cembrane-Type Diterpenoids from the Gum Resin of *Boswellia carterii* and Their Biological Activities**

Xiaowei Sun<sup>a,b</sup>, Yanling Geng<sup>a</sup>, Xiao Wang<sup>a</sup>, Dawei Qin<sup>b,\*</sup>, Jinqian Yu<sup>b,\*</sup>

<sup>a</sup> Shandong Key Laboratory of TCM Quality Control Technology, Shandong Analysis and Test Center, Qilu University of Technology (Shandong Academy of Sciences)

<sup>b</sup> School of Chemistry and Pharmaceutical Engineering, Qilu University of Technology (Shandong Academy of Sciences), Jinan 250353, China

## **Supplementary material**

## Table of Contents

| no. | Content                                                                                                                             | Page |
|-----|-------------------------------------------------------------------------------------------------------------------------------------|------|
| 1   | <b>Figure S1.</b> The HREIMS Spectroscopic Data of Compound <b>1</b>                                                                | S5   |
| 2   | <b>Figure S2.</b> The IR Spectrum of Compound <b>1</b>                                                                              | S6   |
| 3   | <b>Figure S3.</b> The $^1\text{H}$ NMR Spectrum of Compound <b>1</b> in $\text{CDCl}_3$ (400 MHz)                                   | S7   |
| 4   | <b>Figure S4.</b> The $^{13}\text{C}$ NMR Spectrum of Compound <b>1</b> in $\text{CDCl}_3$ (100 MHz)                                | S8   |
| 5   | <b>Figure S5.</b> The $^1\text{H}$ - $^1\text{H}$ COSY Spectrum of Compound <b>1</b> in $\text{CDCl}_3$ (400 MHz for $^1\text{H}$ ) |      |
| 6   | <b>Figure S6.</b> The HSQC Spectrum of Compound <b>1</b> in $\text{CDCl}_3$ (400 MHz for $^1\text{H}$ )                             | S9   |
| 7   | <b>Figure S7.</b> The HMBC Spectrum of Compound <b>1</b> in $\text{CDCl}_3$ (400 MHz for $^1\text{H}$ )                             | S10  |
| 8   | <b>Figure S8.</b> The NOESY Spectrum of Compound <b>1</b> in $\text{CDCl}_3$ (400 MHz for $^1\text{H}$ )                            | S11  |
| 9   | <b>Figure S9.</b> The HREIMS Spectroscopic Data of Compound <b>2</b>                                                                | S12  |
| 10  | <b>Figure S10.</b> The IR Spectrum of Compound <b>2</b>                                                                             | S13  |
| 11  | <b>Figure S11.</b> The $^1\text{H}$ NMR Spectrum of Compound <b>2</b> in $\text{CDCl}_3$ (400 MHz)                                  | S14  |
| 12  | <b>Figure S12.</b> The $^{13}\text{C}$ NMR Spectrum of Compound <b>2</b> in $\text{CDCl}_3$ (100 MHz)                               | S15  |
| 13  | <b>Figure S13.</b> The HSQC Spectrum of Compound <b>2</b> in $\text{CDCl}_3$ (400 MHz for $^1\text{H}$ )                            | S16  |
| 14  | <b>Figure S14.</b> The HMBC Spectrum of Compound <b>2</b> in $\text{CDCl}_3$ (400 MHz for $^1\text{H}$ )                            | S17  |
| 15  | <b>Figure S15.</b> The NOESY Spectrum of Compound <b>2</b> in $\text{CDCl}_3$ (400 MHz)                                             | S18  |
| 16  | <b>Figure S16.</b> The HREIMS Spectroscopic Data of Compound <b>3</b>                                                               | S19  |
| 17  | <b>Figure S17.</b> The IR Spectrum of Compound <b>3</b>                                                                             | S20  |
| 18  | <b>Figure S18.</b> The $^1\text{H}$ NMR Spectrum of Compound <b>3</b> in $\text{CDCl}_3$ (400 MHz)                                  | S21  |
| 19  | <b>Figure S19.</b> The $^{13}\text{C}$ NMR Spectrum of Compound <b>3</b> in $\text{CDCl}_3$ (100 MHz)                               | S22  |

---

|    |                                                                                                                  |     |
|----|------------------------------------------------------------------------------------------------------------------|-----|
| 20 | <b>Figure S20.</b> The HSQC Spectrum of Compound <b>3</b> in CDCl <sub>3</sub> (400 MHz for <sup>1</sup> H)      | S23 |
| 21 | <b>Figure S21.</b> The HMBC Spectrum of Compound <b>3</b> in CDCl <sub>3</sub> (400 MHz for <sup>1</sup> H)      | S24 |
| 22 | <b>Figure S22.</b> The NOESY Spectrum of Compound <b>3</b> in CDCl <sub>3</sub> (400 MHz)                        | S25 |
| 23 | <b>Figure S23.</b> The HREIMS Spectroscopic Data of Compound <b>4</b>                                            | S26 |
| 24 | <b>Figure S24.</b> The IR Spectrum of Compound <b>4</b>                                                          | S27 |
| 25 | <b>Figure S25.</b> The <sup>1</sup> H NMR Spectrum of Compound <b>4</b> in CDCl <sub>3</sub> (400 MHz)           | S28 |
| 26 | <b>Figure S26.</b> The <sup>13</sup> C NMR Spectrum of Compound <b>4</b> in CDCl <sub>3</sub> (100 MHz)          | S29 |
| 27 | <b>Figure S27.</b> The HSQC Spectrum of Compound <b>4</b> in CDCl <sub>3</sub> (400 MHz for <sup>1</sup> H)      | S30 |
| 28 | <b>Figure S28.</b> The HMBC Spectrum of Compound <b>4</b> in CDCl <sub>3</sub> (400 MHz for <sup>1</sup> H)      | S31 |
| 29 | <b>Figure S29.</b> The NOESY Spectrum of Compound <b>4</b> in CDCl <sub>3</sub> (400 MHz)                        | S32 |
| 30 | <b>Figure S30.</b> The HREIMS Spectroscopic Data of Compound <b>5</b>                                            | S33 |
| 31 | <b>Figure S31.</b> The IR Spectrum of Compound <b>5</b>                                                          | S34 |
| 32 | <b>Figure S32.</b> The <sup>1</sup> H NMR Spectrum of Compound <b>5</b> in CDCl <sub>3</sub> (400 MHz)           | S35 |
| 33 | <b>Figure S33.</b> The <sup>13</sup> C NMR Spectrum of Compound <b>5</b> in CDCl <sub>3</sub> (100 MHz)          | S36 |
| 34 | <b>Figure S34.</b> The HSQC Spectrum of Compound <b>5</b> in CDCl <sub>3</sub> (400 MHz for <sup>1</sup> H)      | S37 |
| 35 | <b>Figure S35.</b> The HMBC Spectrum of Compound <b>5</b> in CDCl <sub>3</sub> (400 MHz for <sup>1</sup> H)      | S38 |
| 36 | <b>Figure S36.</b> The NOESY Spectrum of Compound <b>5</b> in CDCl <sub>3</sub> (400 MHz)                        | S39 |
| 37 | <b>Figure S37.</b> The HREIMS Spectroscopic Data of Compound <b>6</b>                                            | S40 |
| 38 | <b>Figure S38.</b> The IR Spectrum of Compound <b>6</b>                                                          | S41 |
| 39 | <b>Figure S39.</b> The <sup>1</sup> H NMR Spectrum of Compound <b>6</b> in DMSO- <i>d</i> <sub>6</sub> (400 MHz) | S42 |

---

---

|    |                                                                                                            |     |
|----|------------------------------------------------------------------------------------------------------------|-----|
| 40 | <b>Figure S40.</b> The $^{13}\text{C}$ NMR Spectrum of Compound <b>6</b> in $\text{DMSO-}d_6$ (100 MHz)    | S43 |
| 41 | <b>Figure S41.</b> The HSQC Spectrum of Compound <b>6</b> in $\text{DMSO-}d_6$ (400 MHz for $^1\text{H}$ ) | S44 |
| 42 | <b>Figure S42.</b> The HMBC Spectrum of Compound <b>6</b> in $\text{DMSO-}d_6$ (400 MHz for $^1\text{H}$ ) | S45 |
| 43 | <b>Figure S43.</b> The NOESY Spectrum of Compound <b>6</b> in $\text{DMSO-}d_6$ (400 MHz)                  | S46 |
| 44 | <b>Figure S44.</b> The HREIMS Spectroscopic Data of Compound <b>7</b>                                      | S47 |
| 45 | <b>Figure S45.</b> The IR Spectrum of Compound <b>7</b>                                                    | S48 |
| 46 | <b>Figure S46.</b> The $^1\text{H}$ NMR Spectrum of Compound <b>7</b> in $\text{CDCl}_3$ (400 MHz)         | S49 |
| 47 | <b>Figure S47.</b> The $^{13}\text{C}$ NMR Spectrum of Compound <b>7</b> in $\text{CDCl}_3$ (100 MHz)      | S50 |
| 48 | <b>Figure S48.</b> The HSQC Spectrum of Compound <b>7</b> in $\text{CDCl}_3$ (400 MHz for $^1\text{H}$ )   | S51 |
| 49 | <b>Figure S49.</b> The HMBC Spectrum of Compound <b>7</b> in $\text{CDCl}_3$ (400 MHz for $^1\text{H}$ )   | S52 |
| 50 | <b>Figure S50.</b> The NOESY Spectrum of Compound <b>7</b> in $\text{CDCl}_3$ (400 MHz)                    | S53 |
| 51 | <b>Figure S51.</b> The HREIMS Spectroscopic Data of Compound <b>8</b>                                      | S54 |
| 52 | <b>Figure S52.</b> The IR Spectrum of Compound <b>8</b>                                                    | S55 |
| 53 | <b>Figure S53.</b> The $^1\text{H}$ NMR Spectrum of Compound <b>8</b> in $\text{CDCl}_3$ (400 MHz)         | S56 |
| 54 | <b>Figure S54.</b> The $^{13}\text{C}$ NMR Spectrum of Compound <b>8</b> in $\text{CDCl}_3$ (100 MHz)      | S57 |
| 55 | <b>Figure S55.</b> The HSQC Spectrum of Compound <b>8</b> in $\text{CDCl}_3$ (400 MHz for $^1\text{H}$ )   | S58 |
| 56 | <b>Figure S56.</b> The HMBC Spectrum of Compound <b>8</b> in $\text{CDCl}_3$ (400 MHz for $^1\text{H}$ )   | S59 |
| 57 | <b>Figure S57.</b> The NOESY Spectrum of Compound <b>8</b> in $\text{CDCl}_3$ (400 MHz)                    | S60 |

---

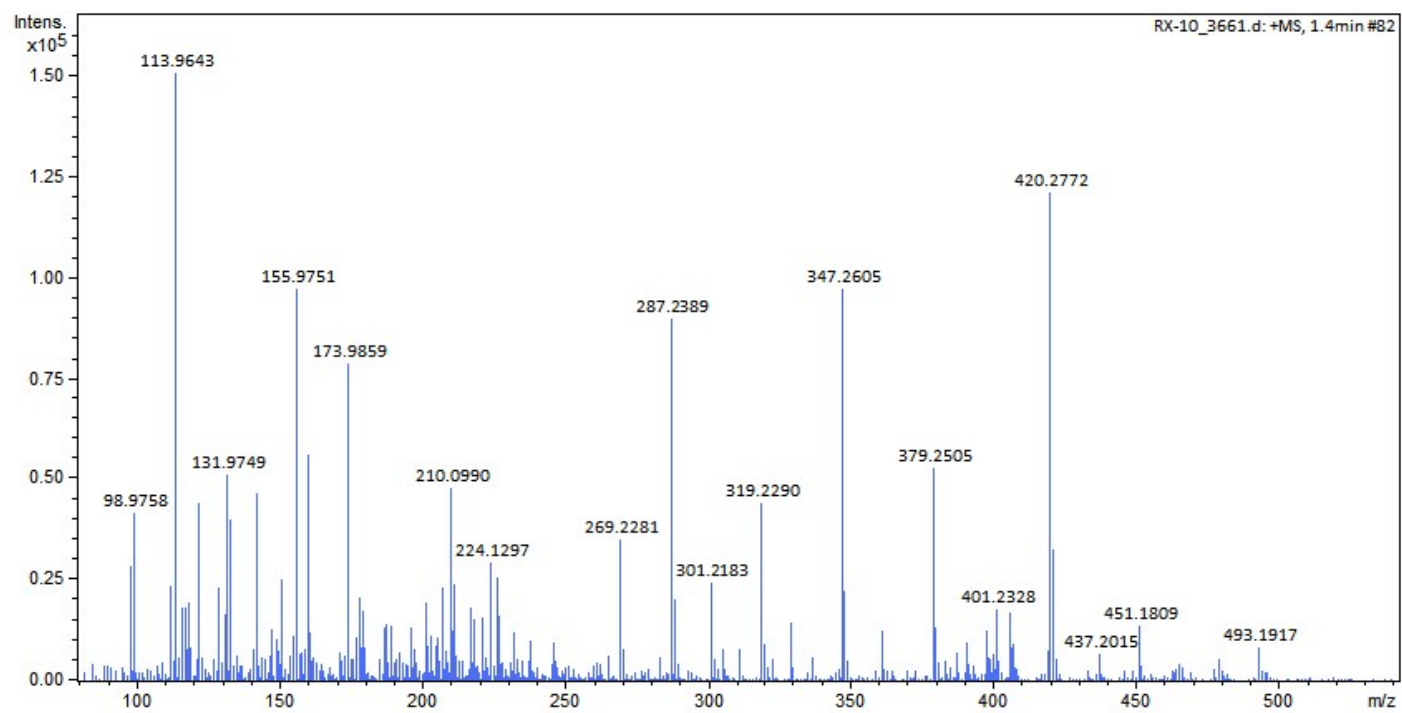

**Figure S1.** The HREIMS Spectroscopic Data of Compound 1

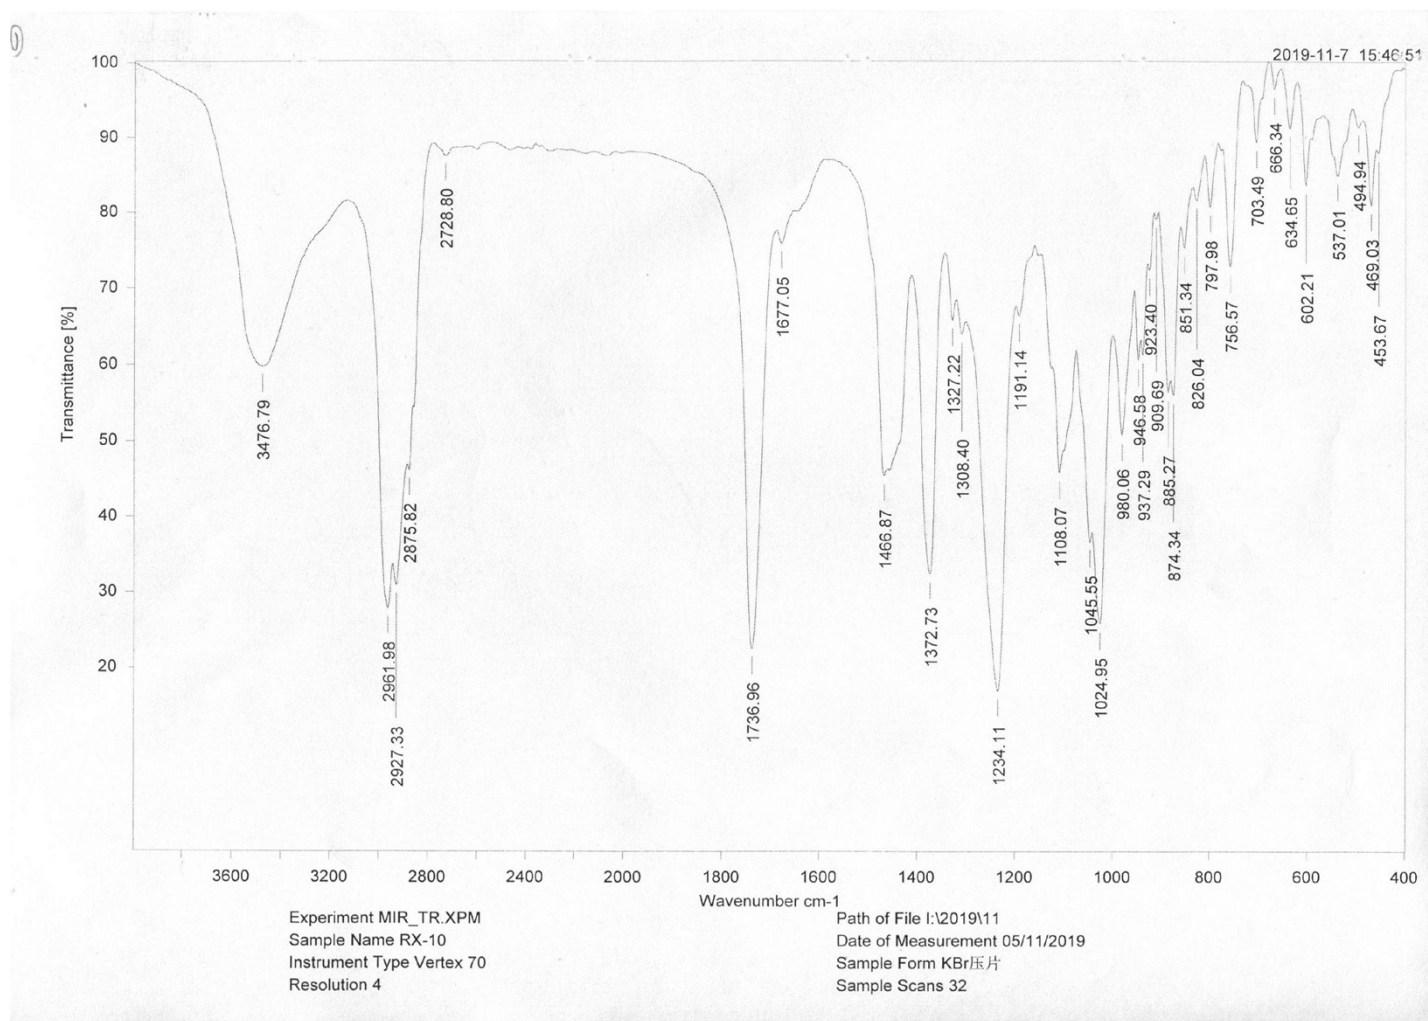

**Figure S2.** The IR Spectrum of Compound 1

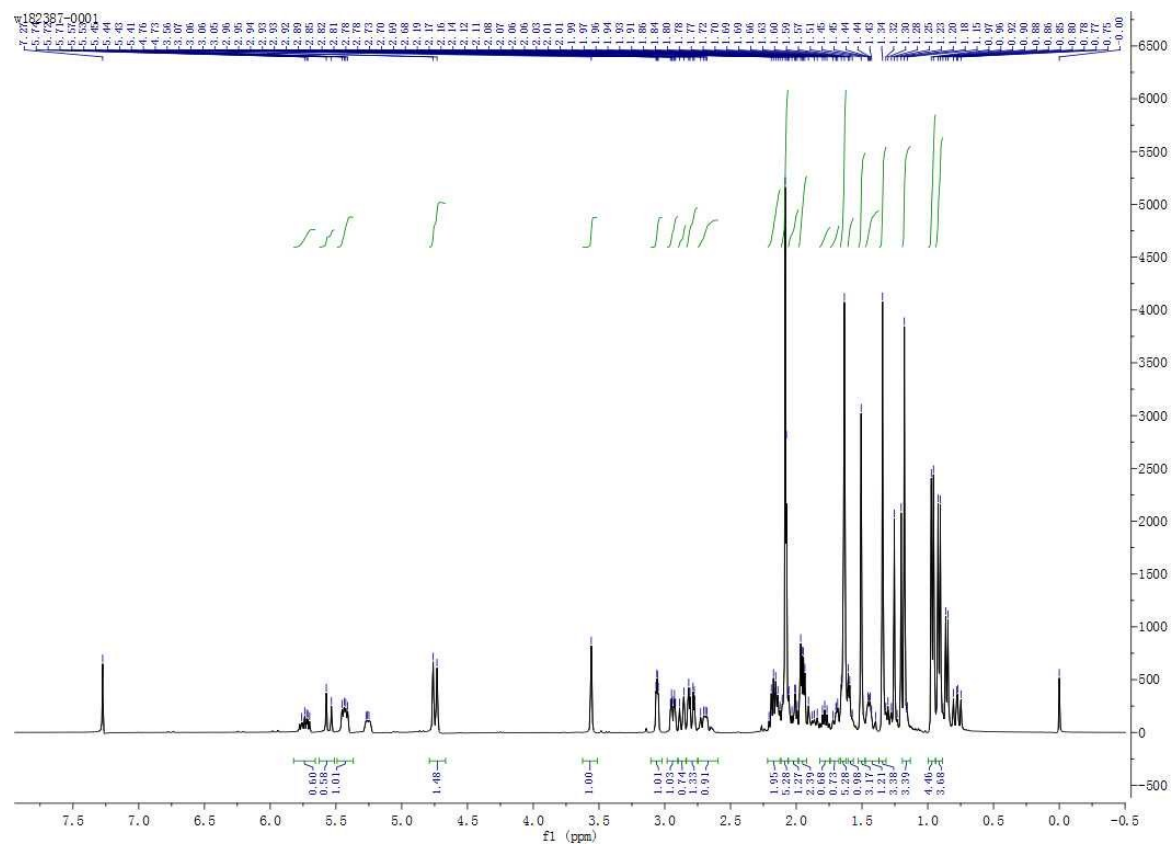

**Figure S3.** The  $^1\text{H}$  NMR Spectrum of Compound 1 in  $\text{CDCl}_3$  (400 MHz)

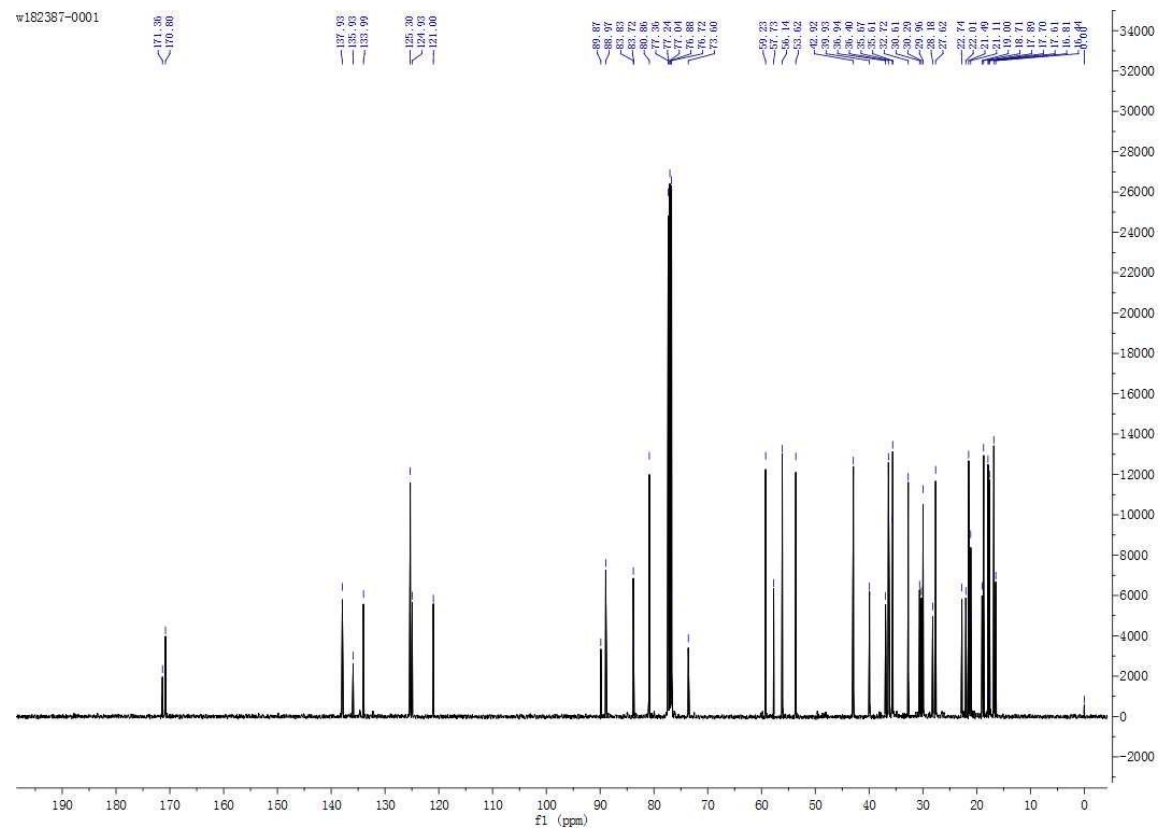

**Figure S4.** The  $^{13}\text{C}$  NMR Spectrum of Compound **1** in  $\text{CDCl}_3$  (100 MHz)



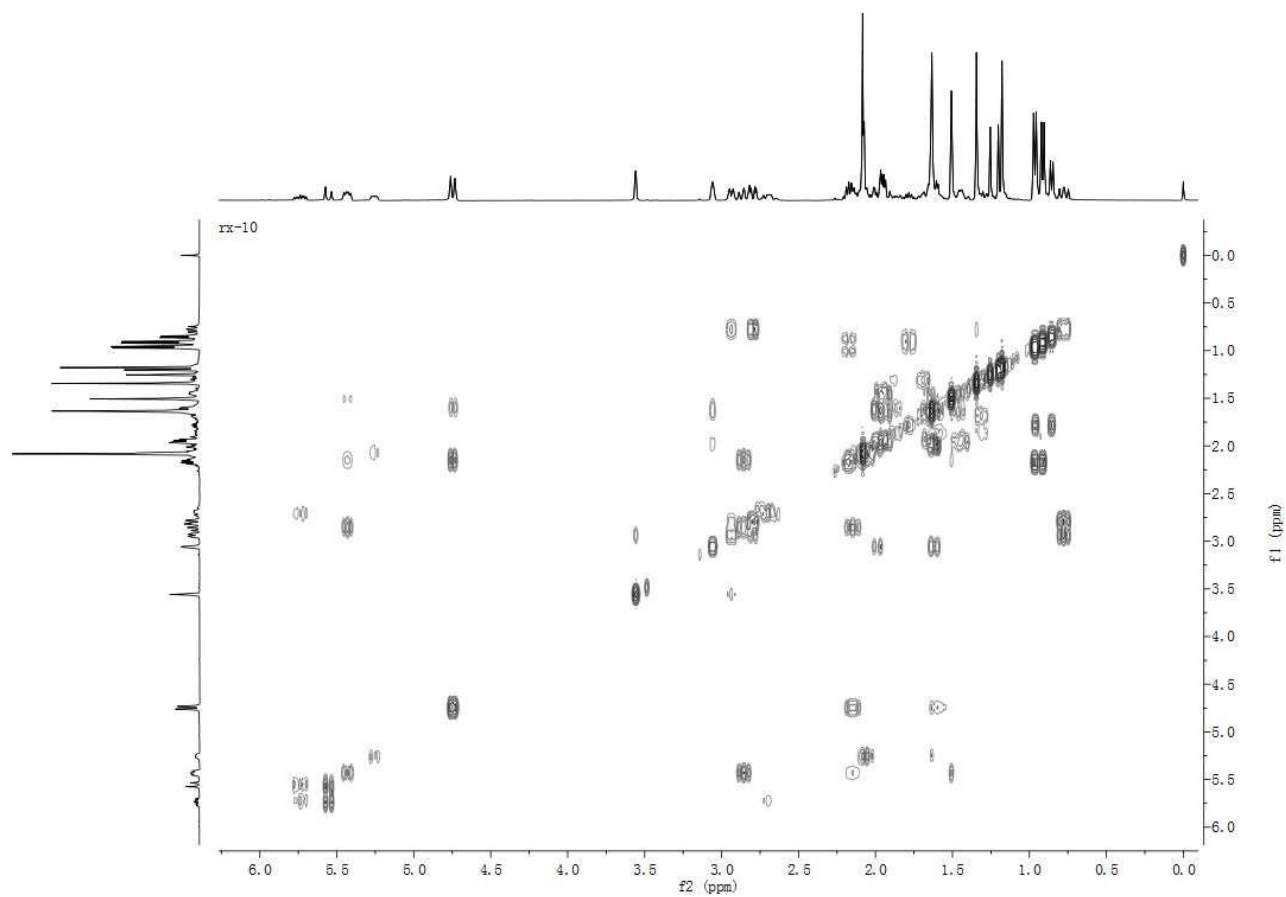

**Figure S5.** The  $^1\text{H}$ - $^1\text{H}$  COSY Spectrum of Compound **1** in  $\text{CDCl}_3$  (400 MHz for  $^1\text{H}$ )

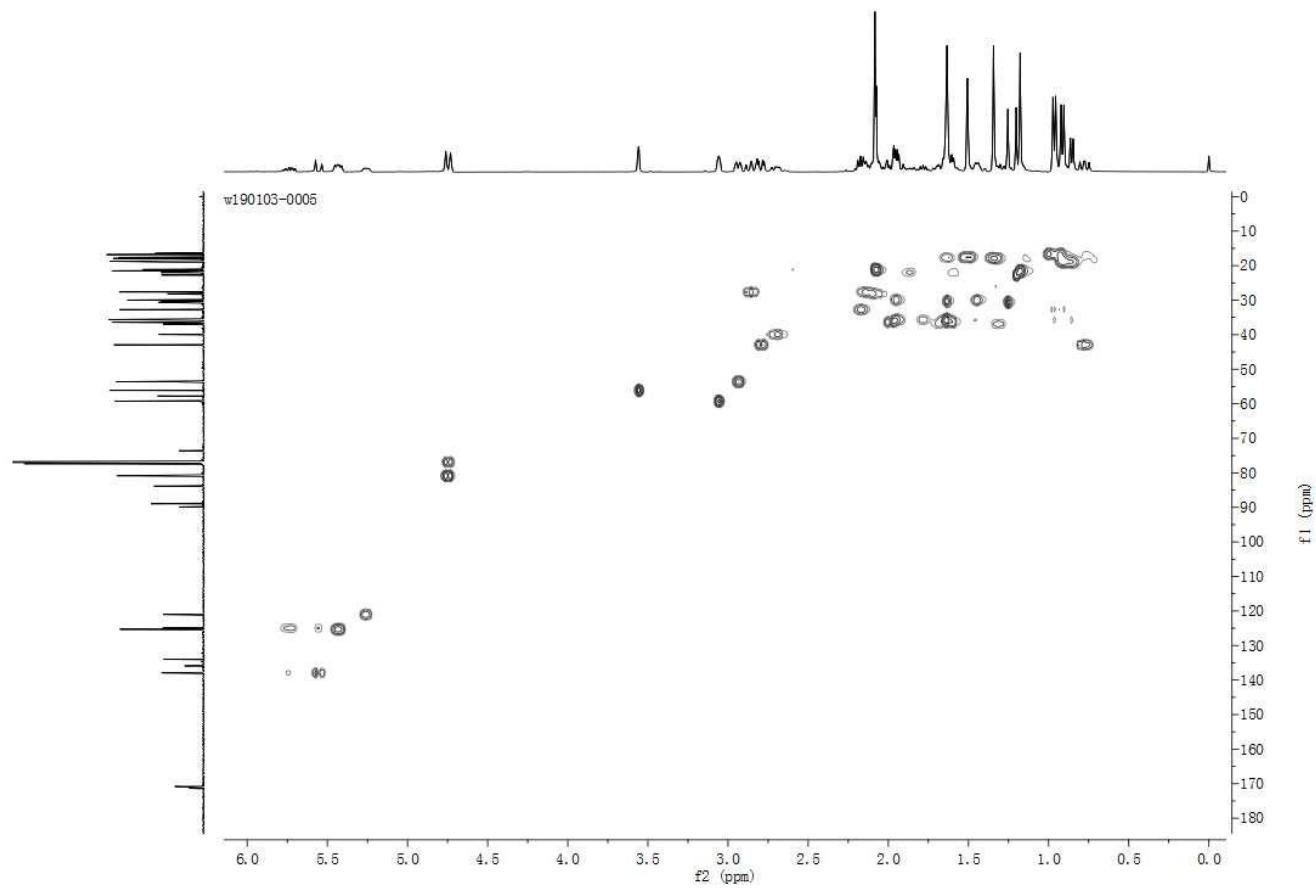

**Figure S6.** The HSQC Spectrum of Compound **1** in  $\text{CDCl}_3$  (400 MHz for  $^1\text{H}$ )

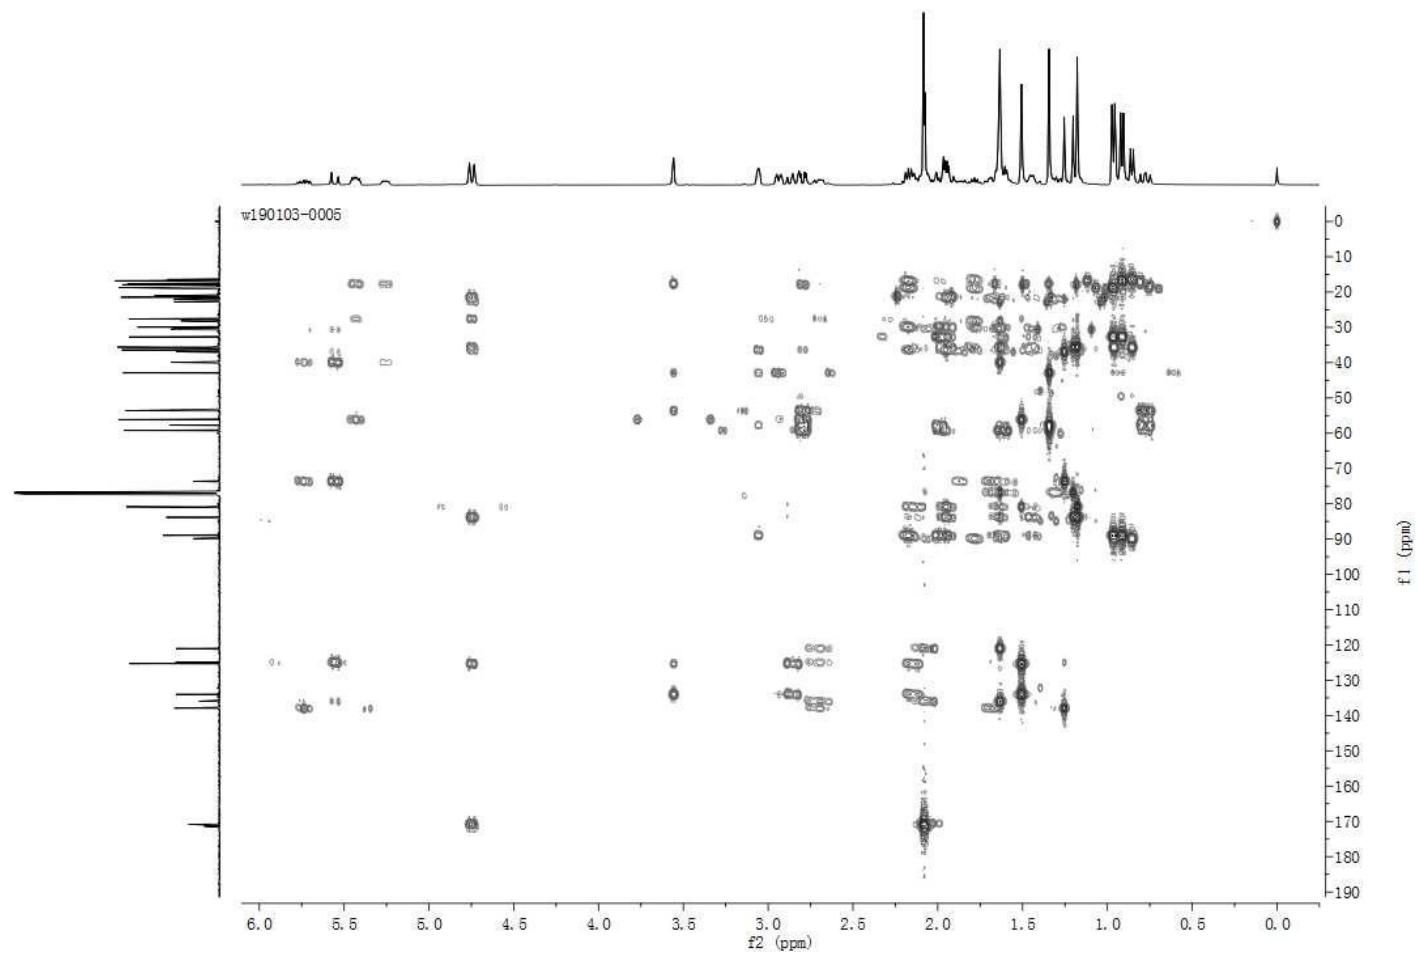

**Figure S7.** The HMBC Spectrum of Compound **1** in  $\text{CDCl}_3$  (400 MHz for  $^1\text{H}$ )

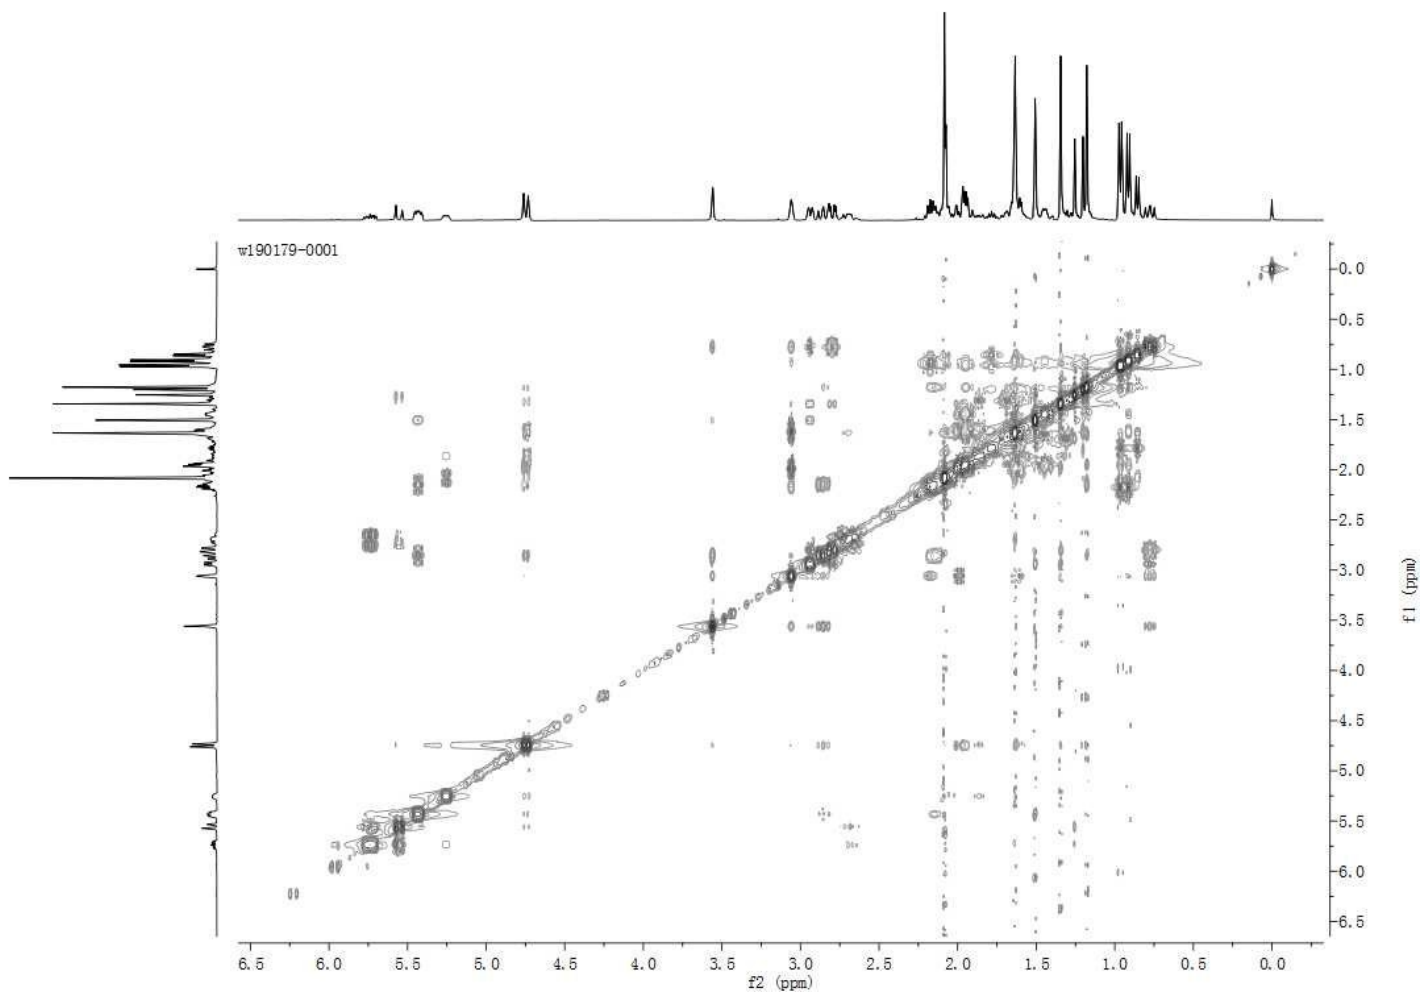

**Figure S8.** The NOESY Spectrum of Compound **1** in  $\text{CDCl}_3$  (400 MHz for  $^1\text{H}$ )

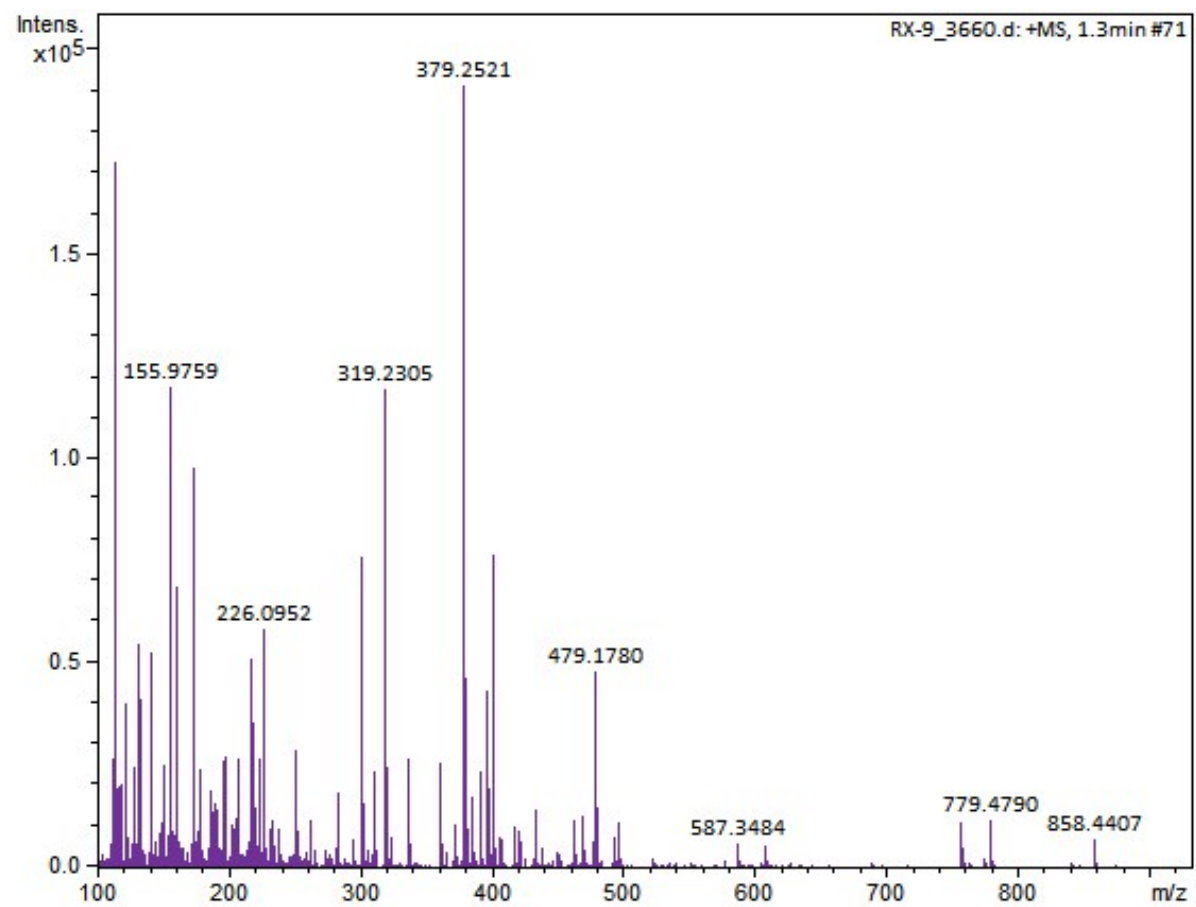

**Figure S9.** The HREIMS Spectroscopic Data of Compound 2

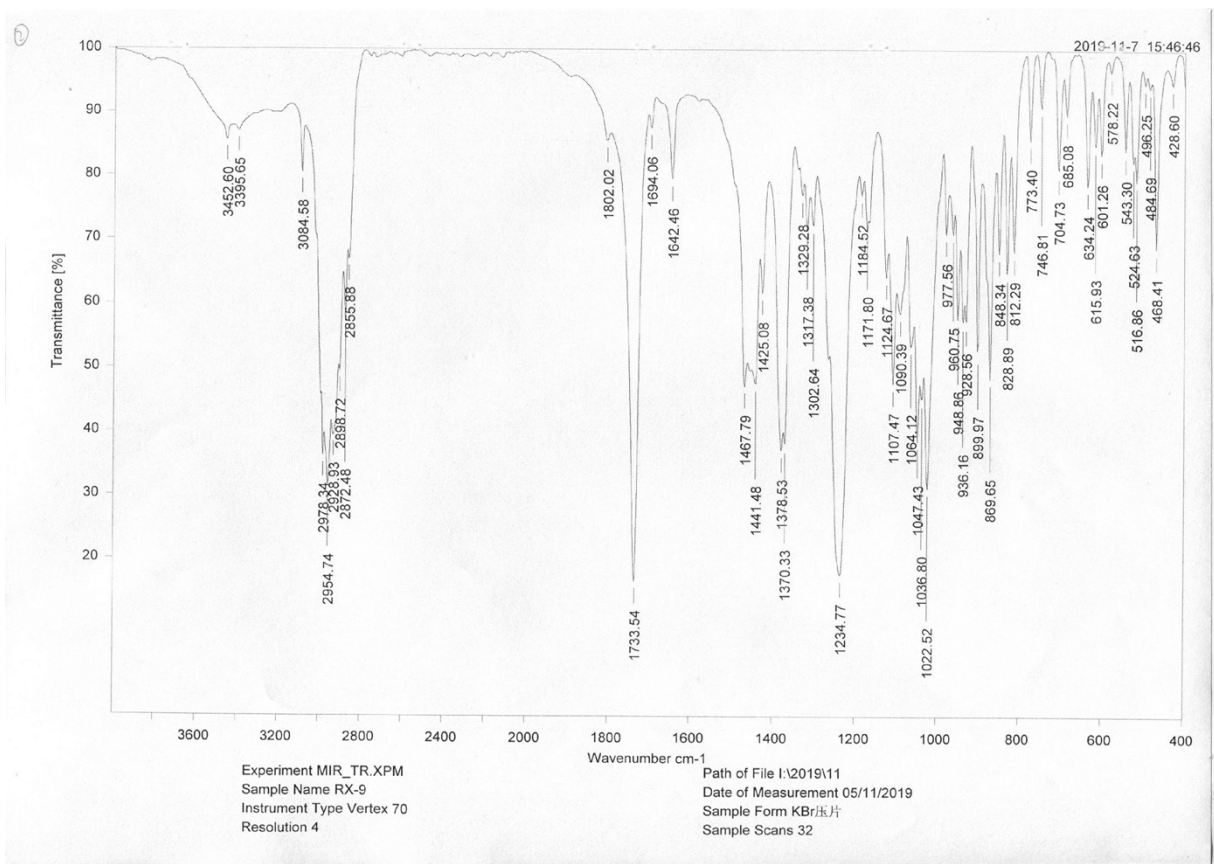

Figure S10. The IR Spectrum of Compound 2

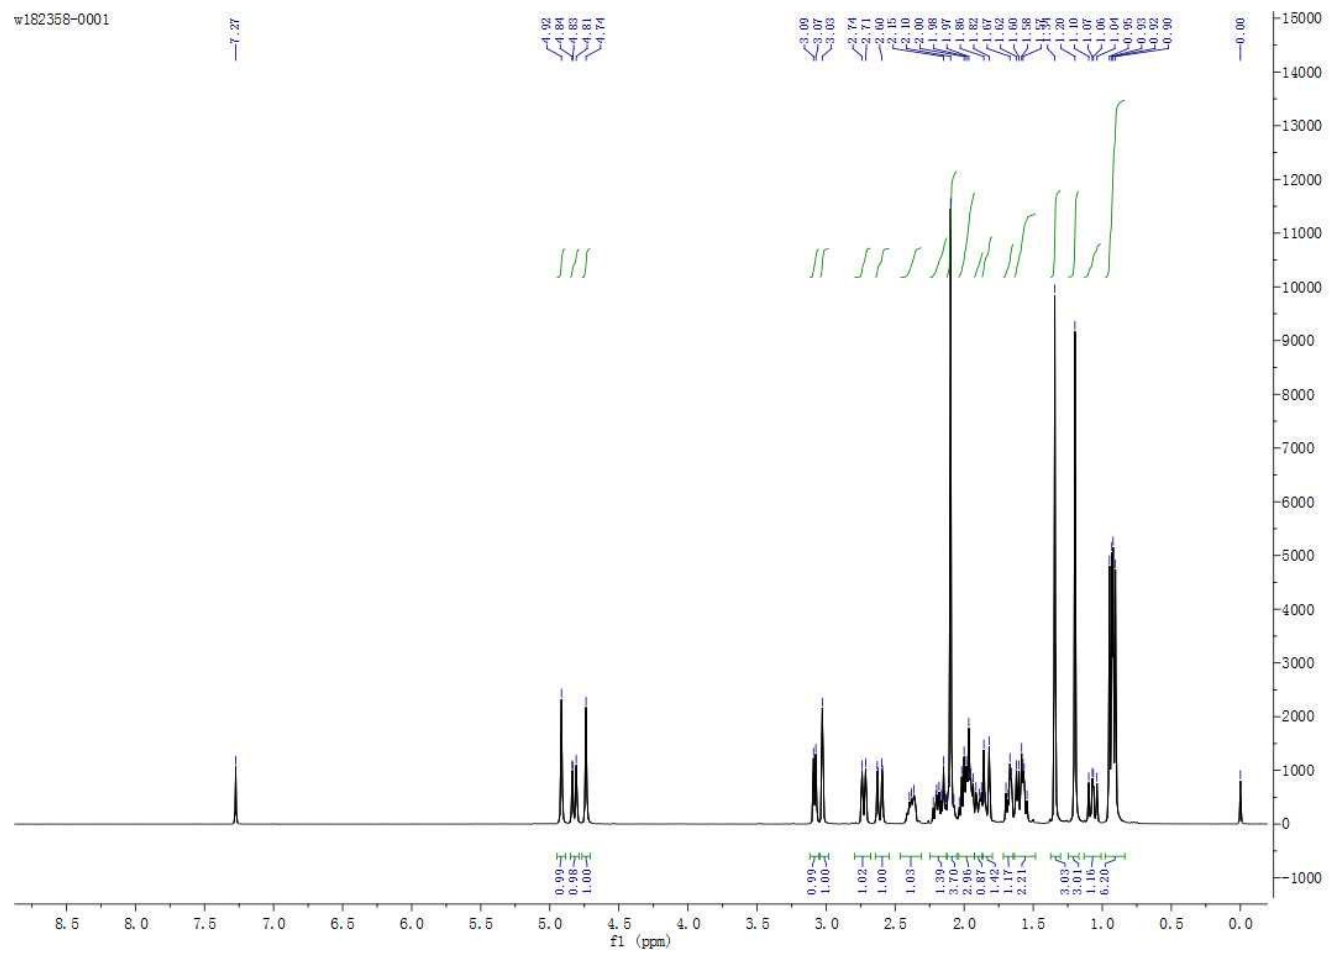

**Figure S11.** The  $^1\text{H}$  NMR Spectrum of Compound **2** in  $\text{CDCl}_3$  (400 MHz)

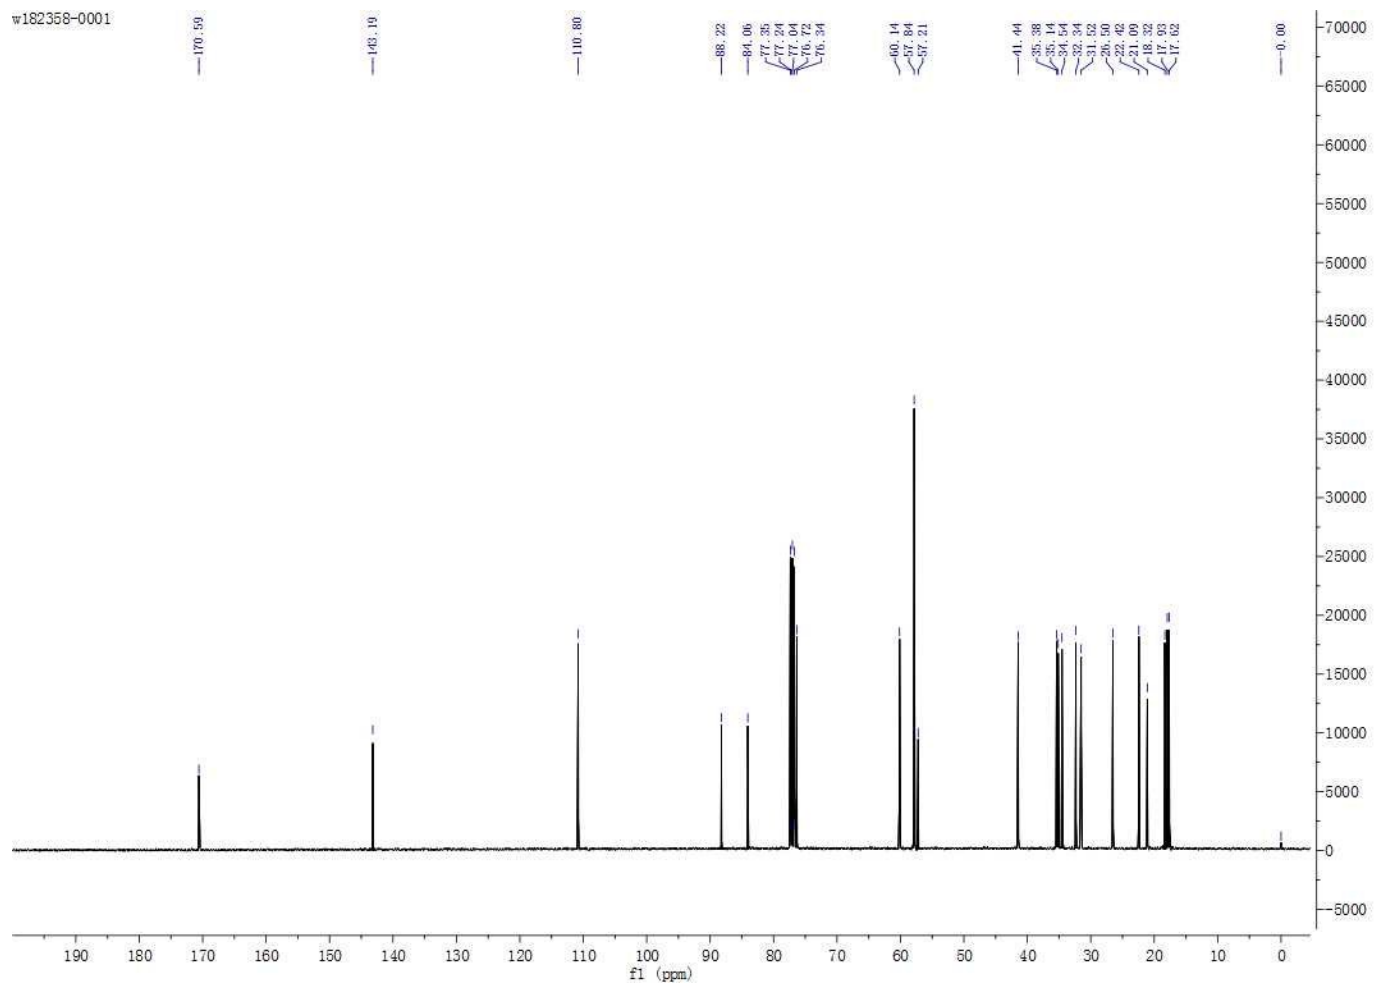

**Figure S12.** The  $^{13}\text{C}$  NMR Spectrum of Compound **2** in  $\text{CDCl}_3$  (100 MHz)



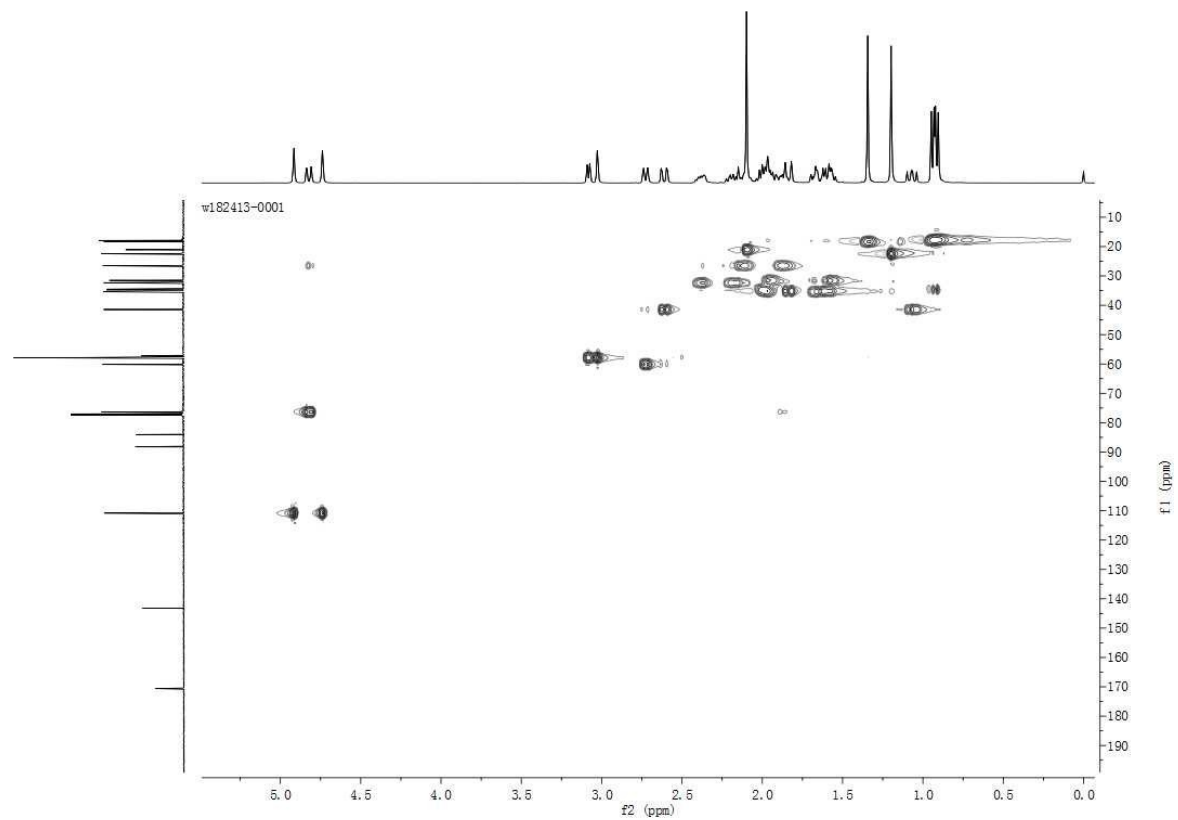

**Figure S13.** The HSQC Spectrum of Compound **2** in  $\text{CDCl}_3$  (400 MHz for  $^1\text{H}$ )

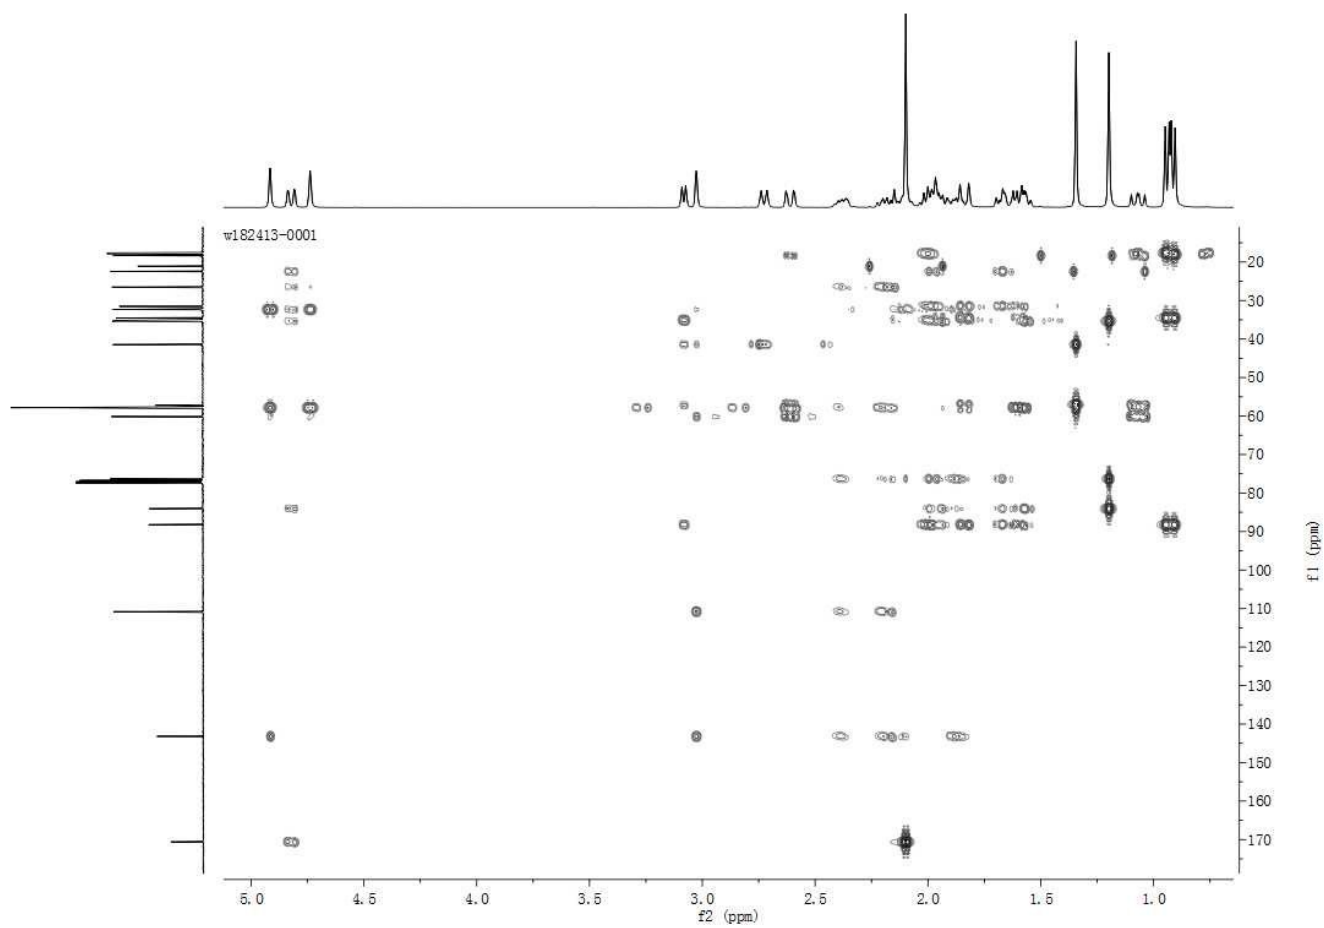

**Figure S14.** The HMBC Spectrum of Compound **2** in  $\text{CDCl}_3$  (400 MHz for  $^1\text{H}$ )

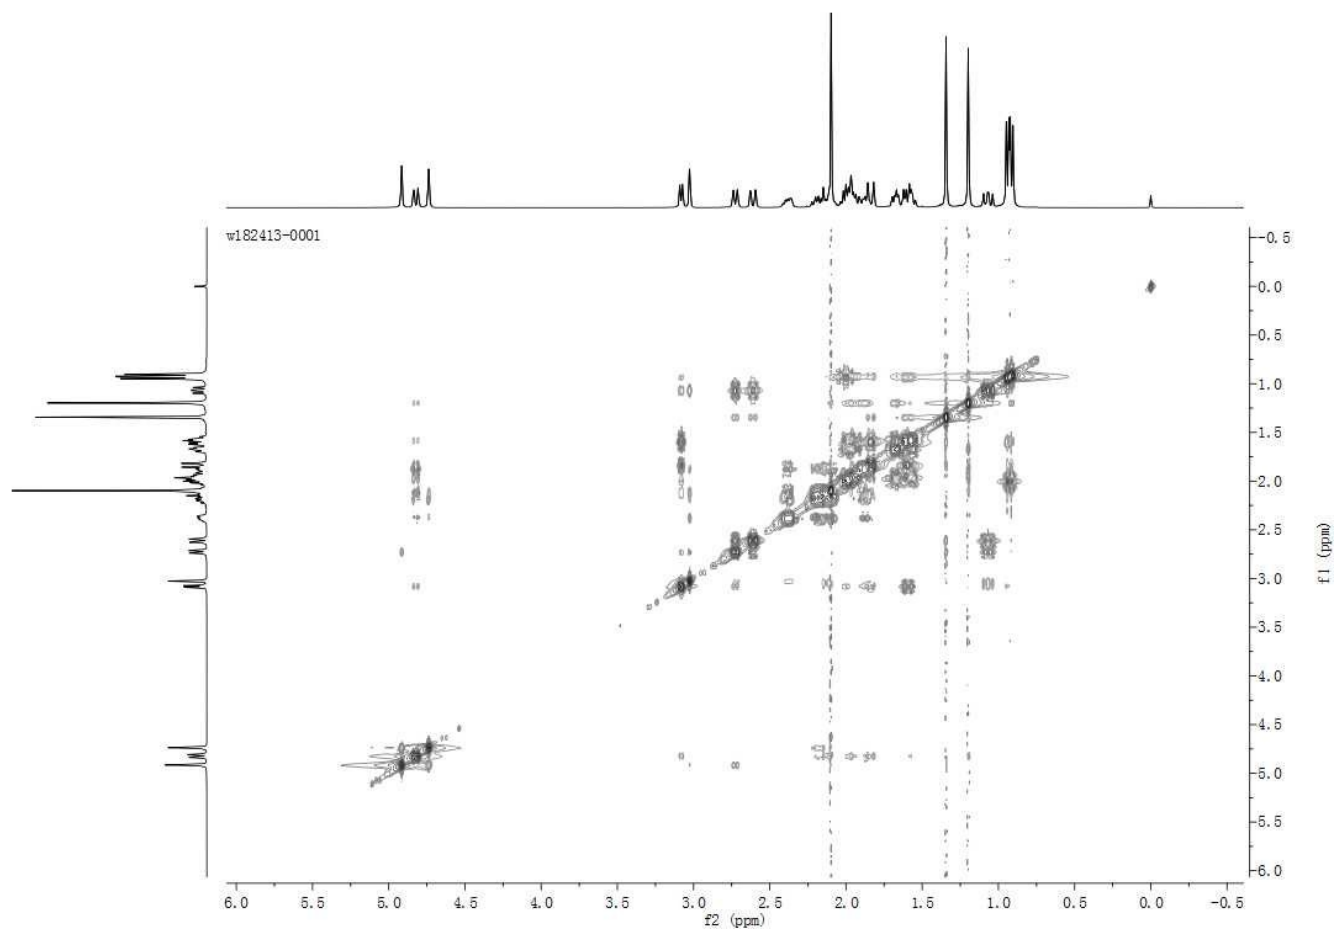

**Figure S15.** The NOESY Spectrum of Compound **2** in  $\text{CDCl}_3$  (400 MHz)

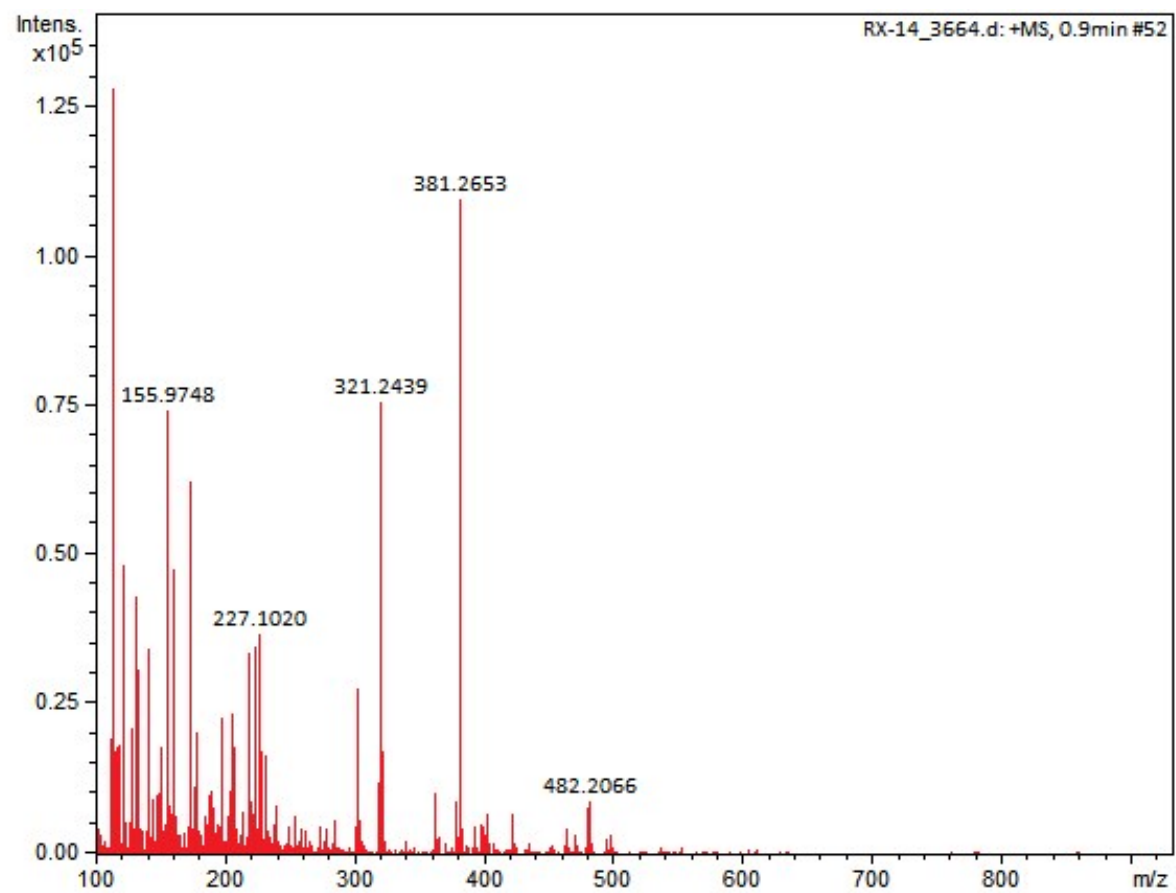

**Figure S16.** The HREIMS Spectroscopic Data of Compound **3**

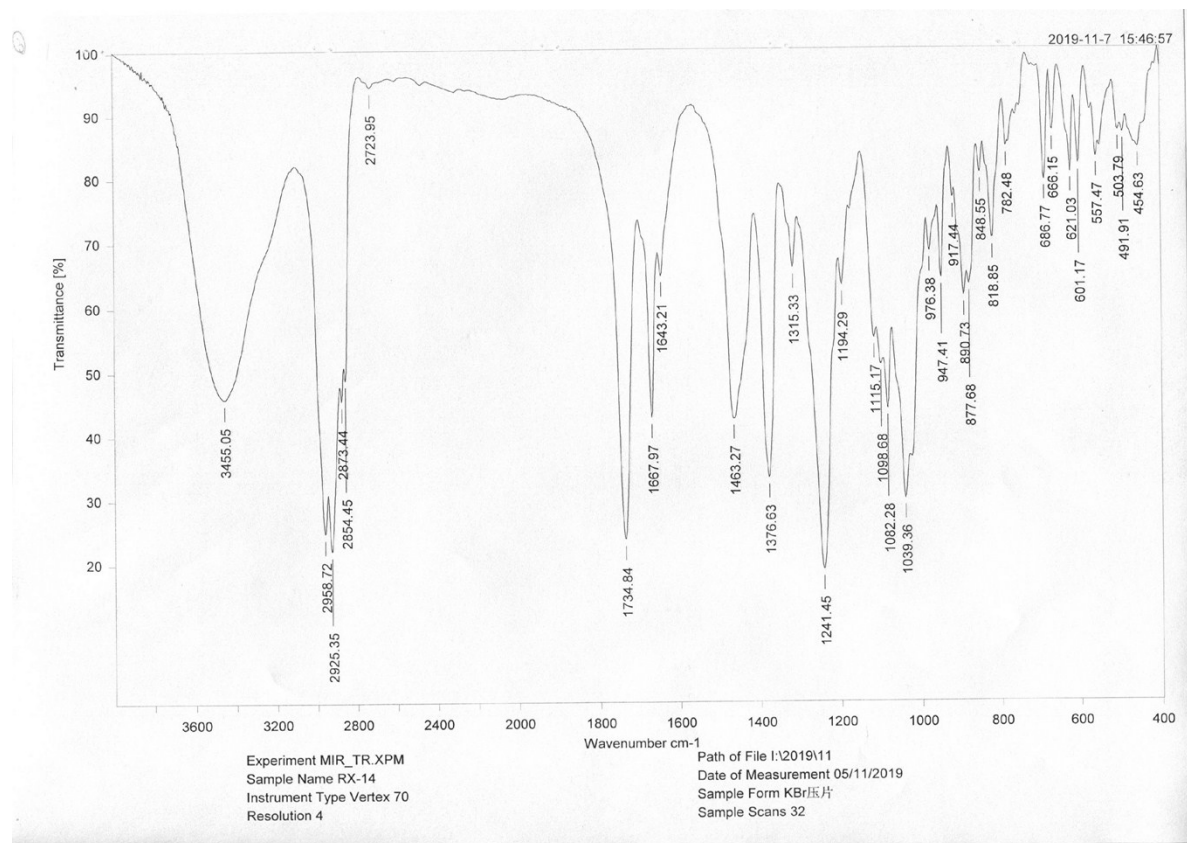

**Figure S17.** The IR Spectrum of Compound **3**

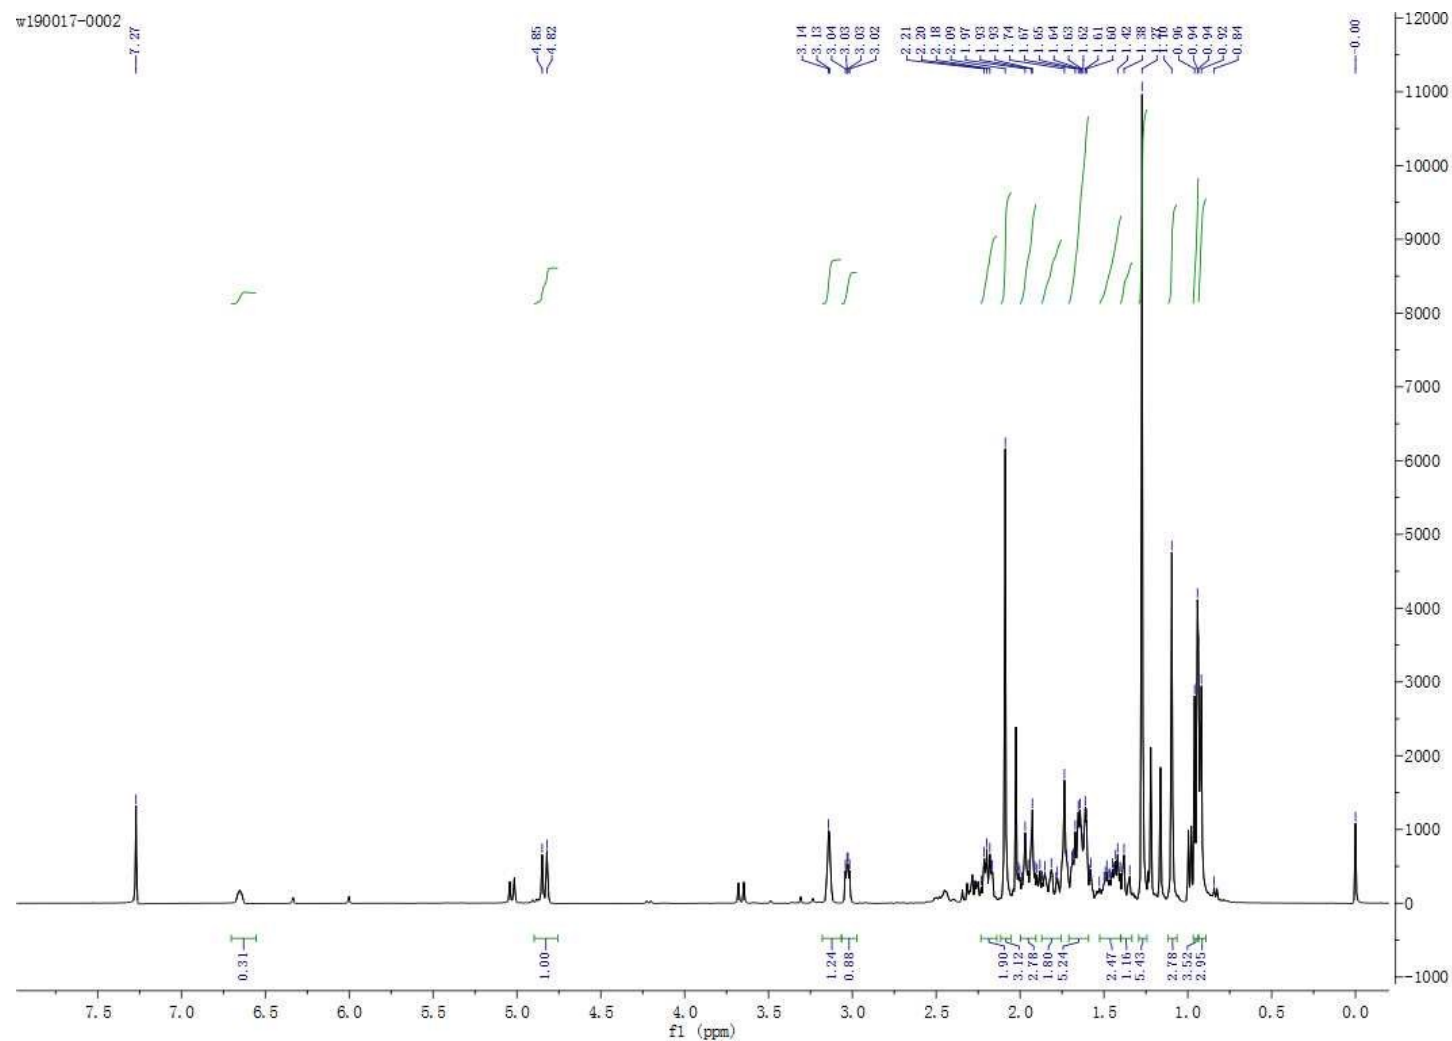

**Figure S18.** The  $^1\text{H}$  NMR Spectrum of Compound **3** in  $\text{CDCl}_3$  (400 MHz)

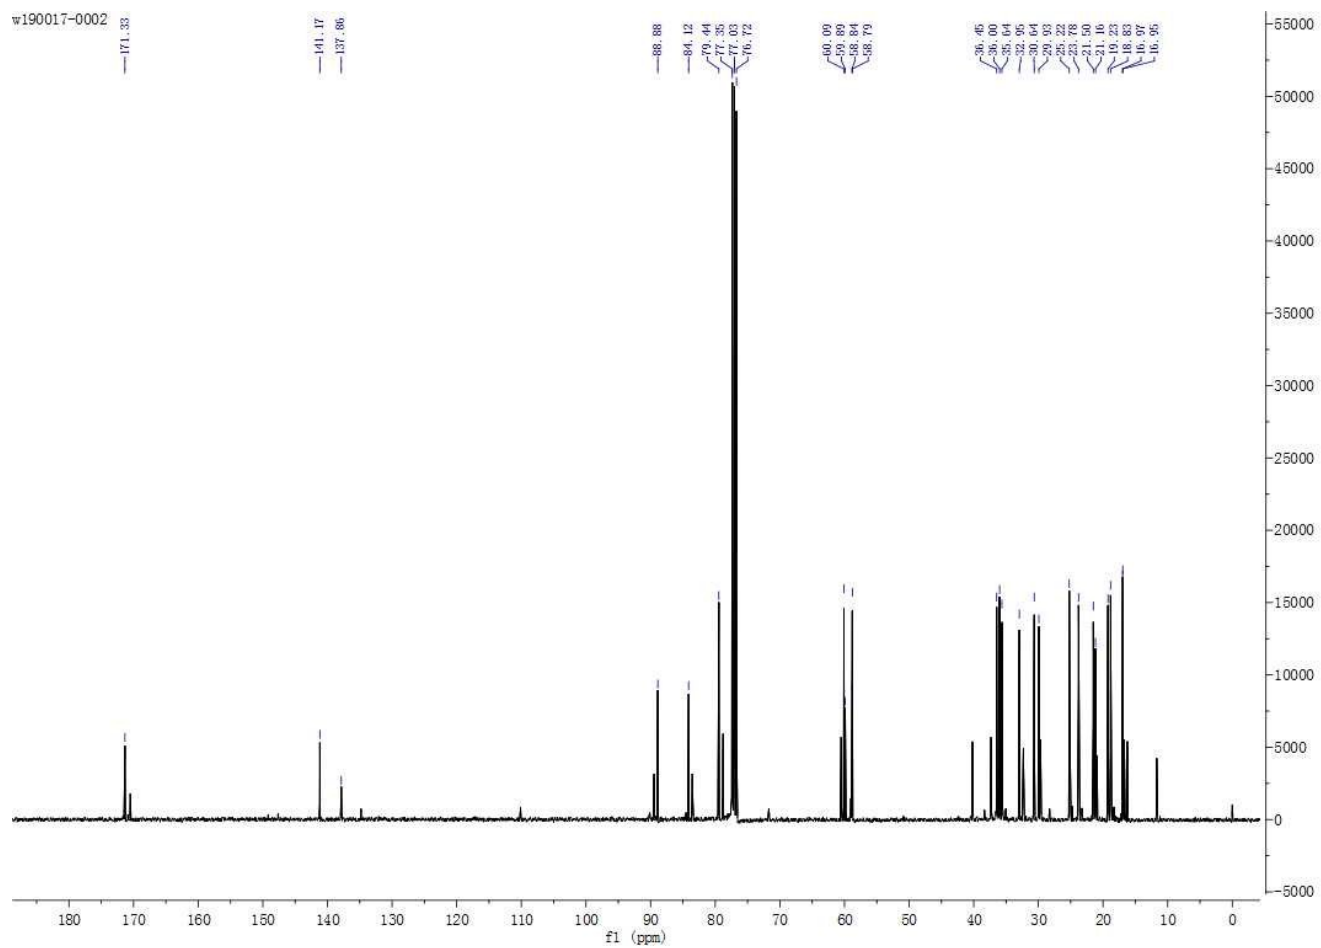

**Figure S19.** The  $^{13}\text{C}$  NMR Spectrum of Compound **3** in  $\text{CDCl}_3$  (100 MHz)

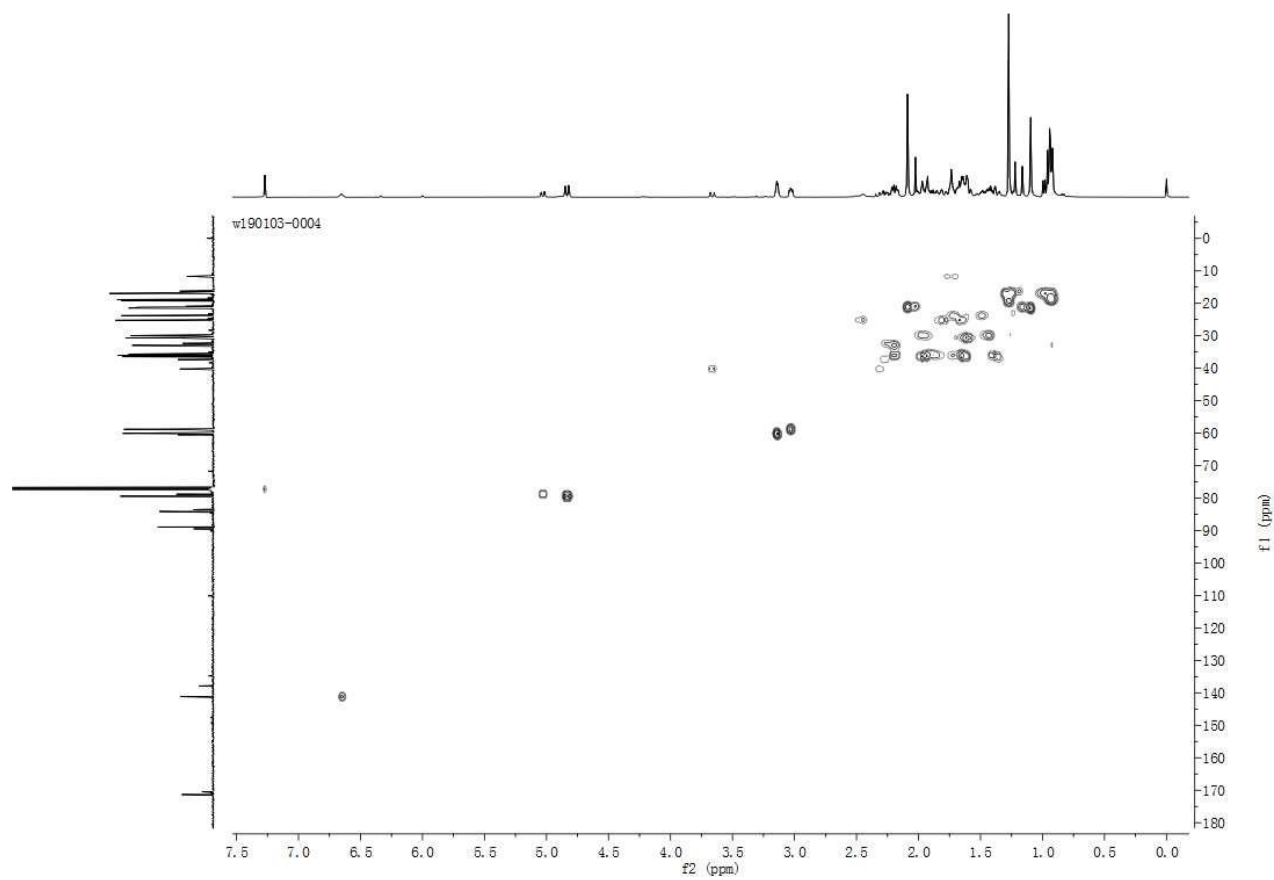

**Figure S20.** The HSQC Spectrum of Compound **3** in  $\text{CDCl}_3$  (400 MHz for  $^1\text{H}$ )



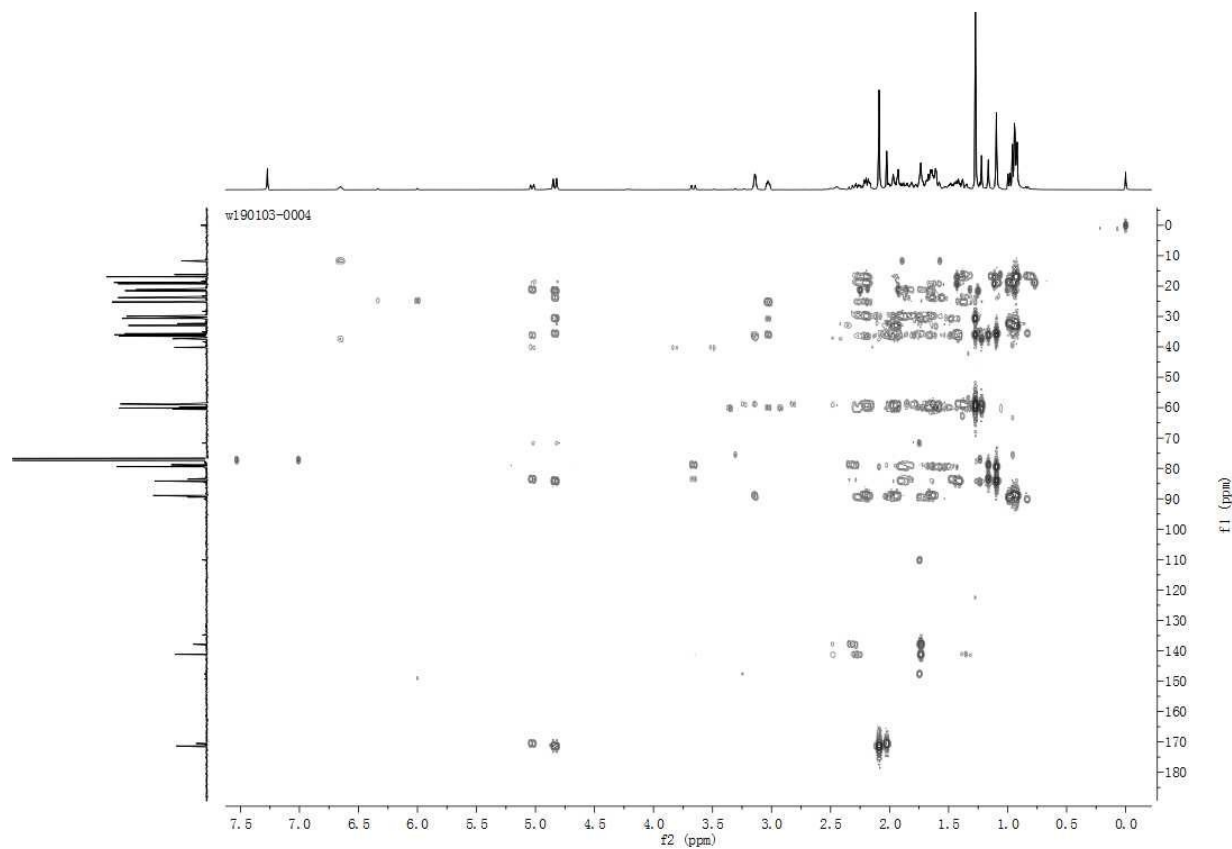

**Figure S21.** The HMBC Spectrum of Compound **3** in  $\text{CDCl}_3$  (400 MHz for  $^1\text{H}$ )

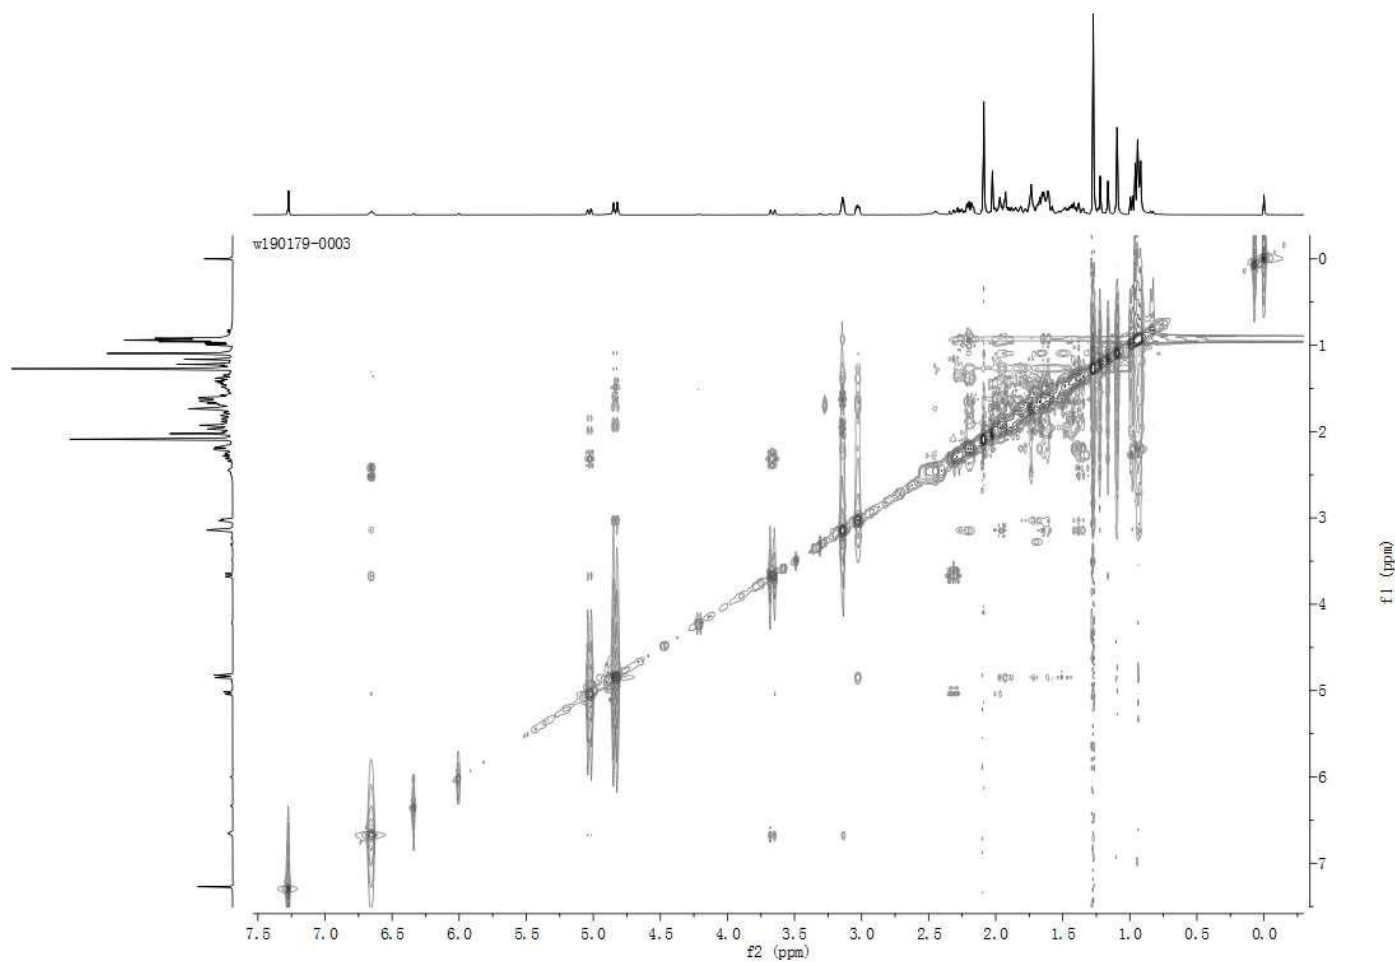

**Figure S22.** The NOESY Spectrum of Compound **3** in  $\text{CDCl}_3$  (400 MHz)

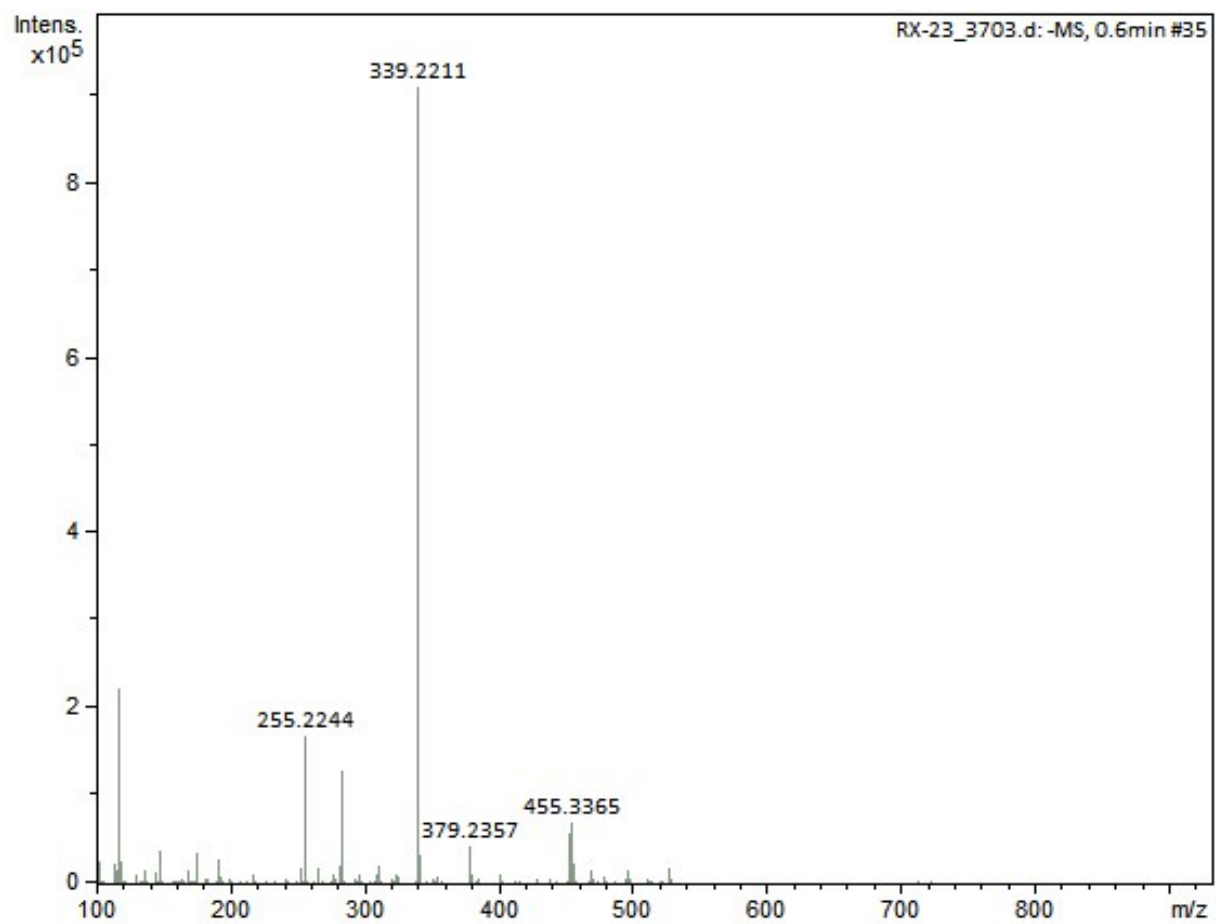

**Figure S23.** The HREIMS Spectroscopic Data of Compound 4

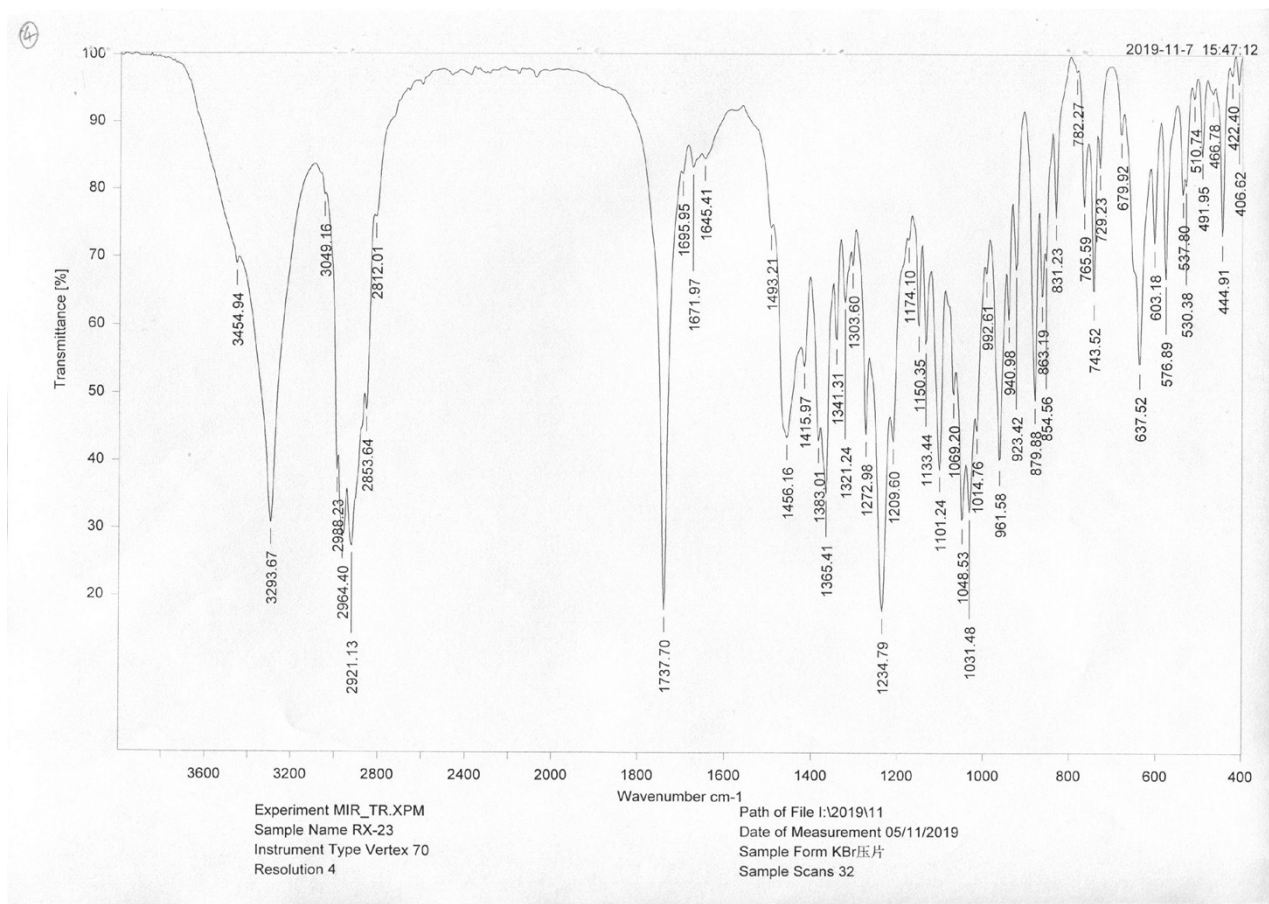

**Figure S24.** The IR Spectrum of Compound 4

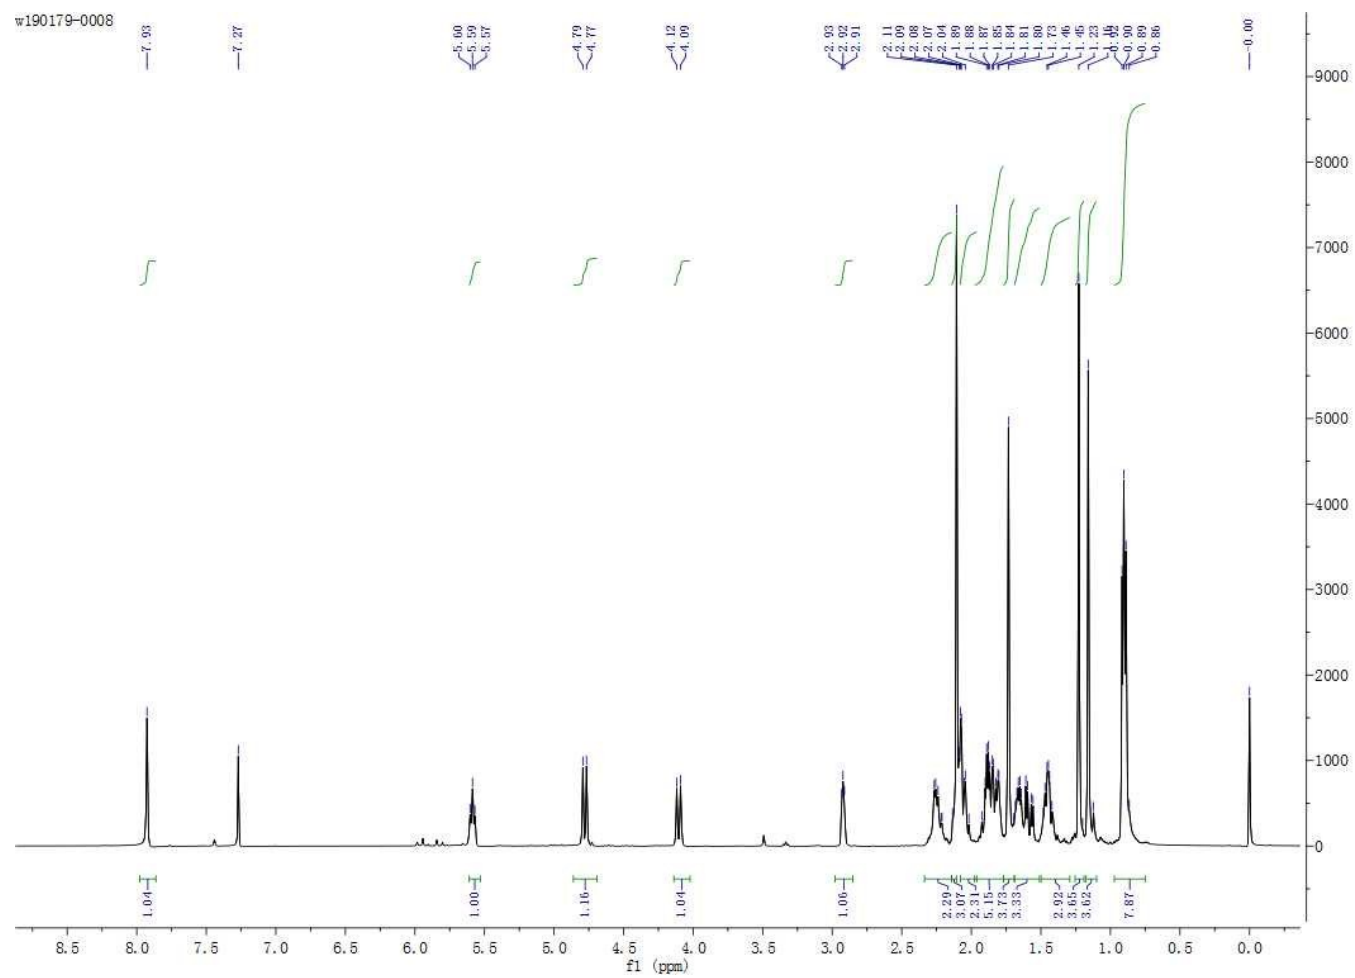

**Figure S25.** The  $^1\text{H}$  NMR Spectrum of Compound **4** in  $\text{CDCl}_3$  (400 MHz)

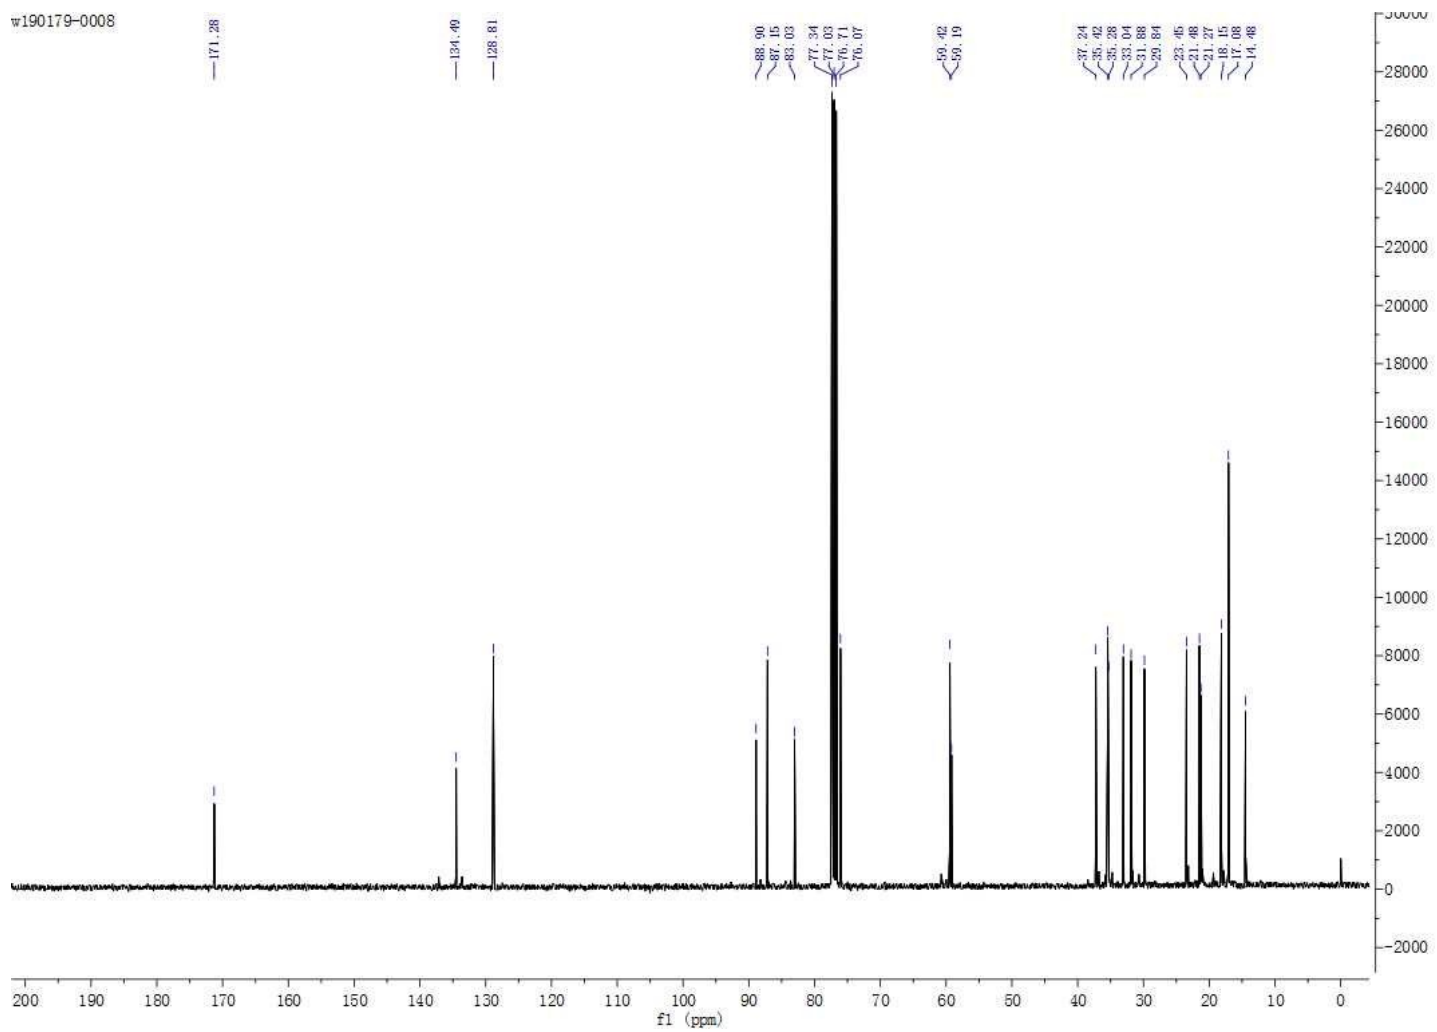

**Figure S26.** The  $^{13}\text{C}$  NMR Spectrum of Compound **4** in  $\text{CDCl}_3$  (100 MHz)

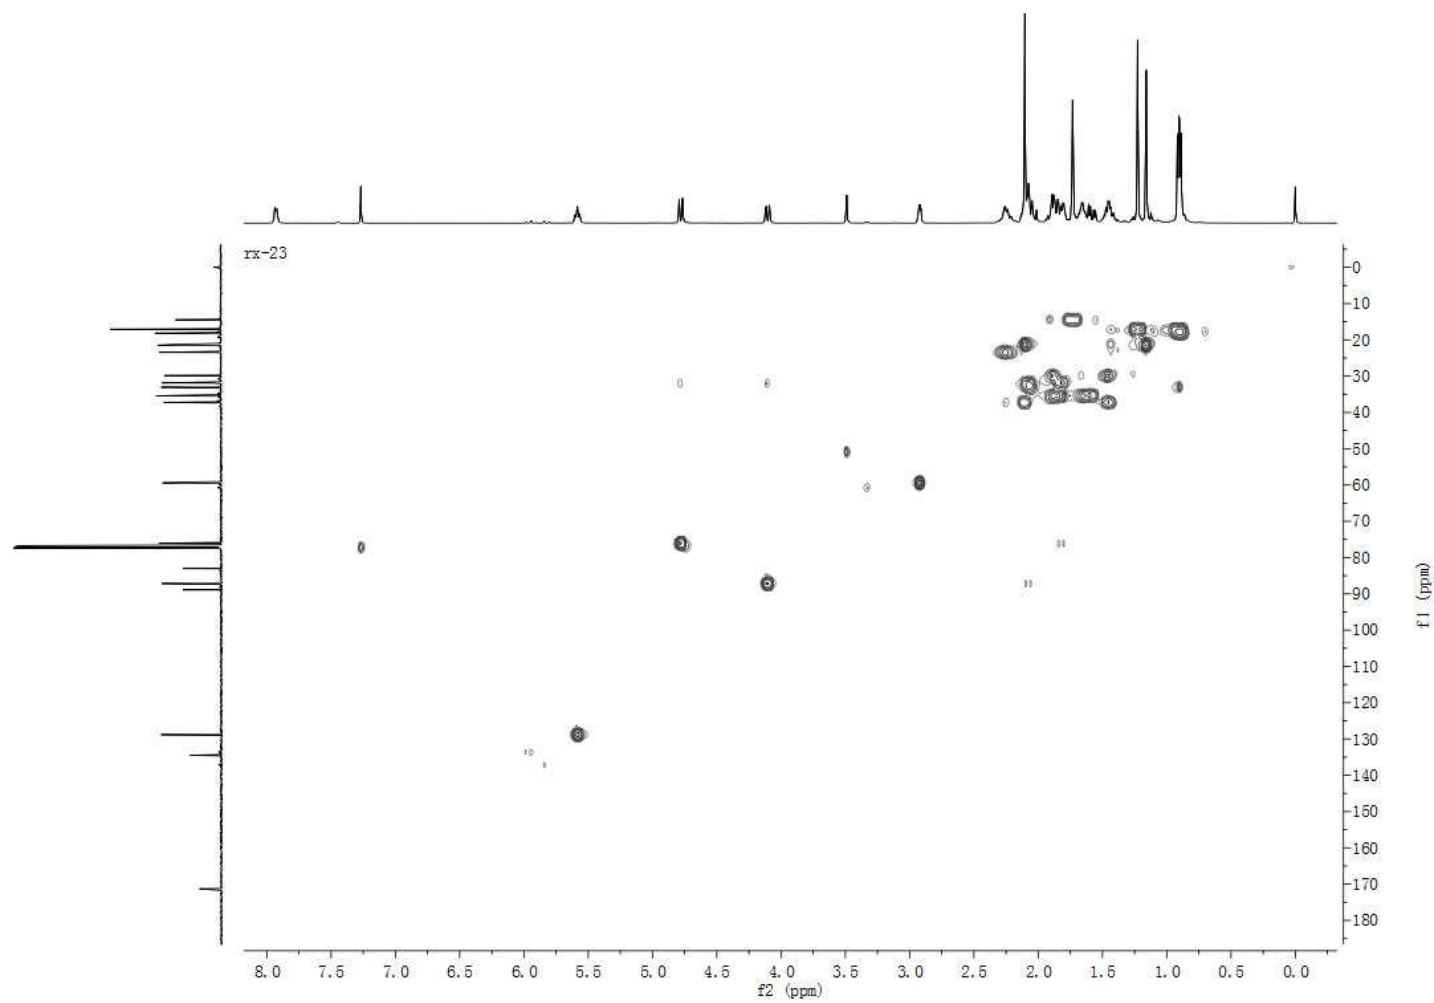

**Figure S27.** The HSQC Spectrum of Compound **4** in  $\text{CDCl}_3$  (400 MHz for  $^1\text{H}$ )

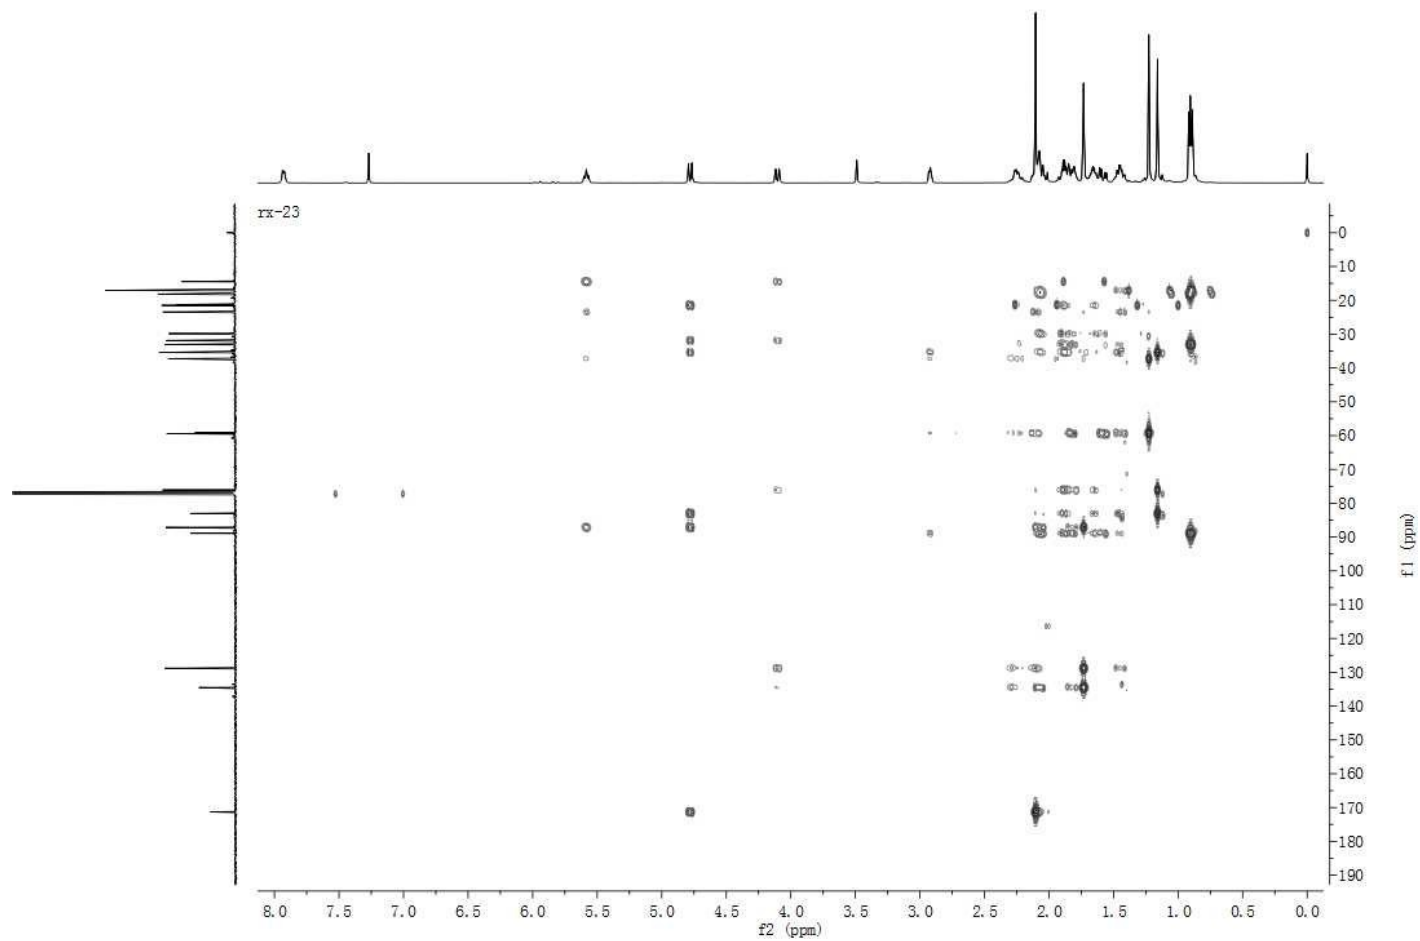

**Figure S28.** The HMBC Spectrum of Compound **4** in  $\text{CDCl}_3$  (400 MHz for  $^1\text{H}$ )



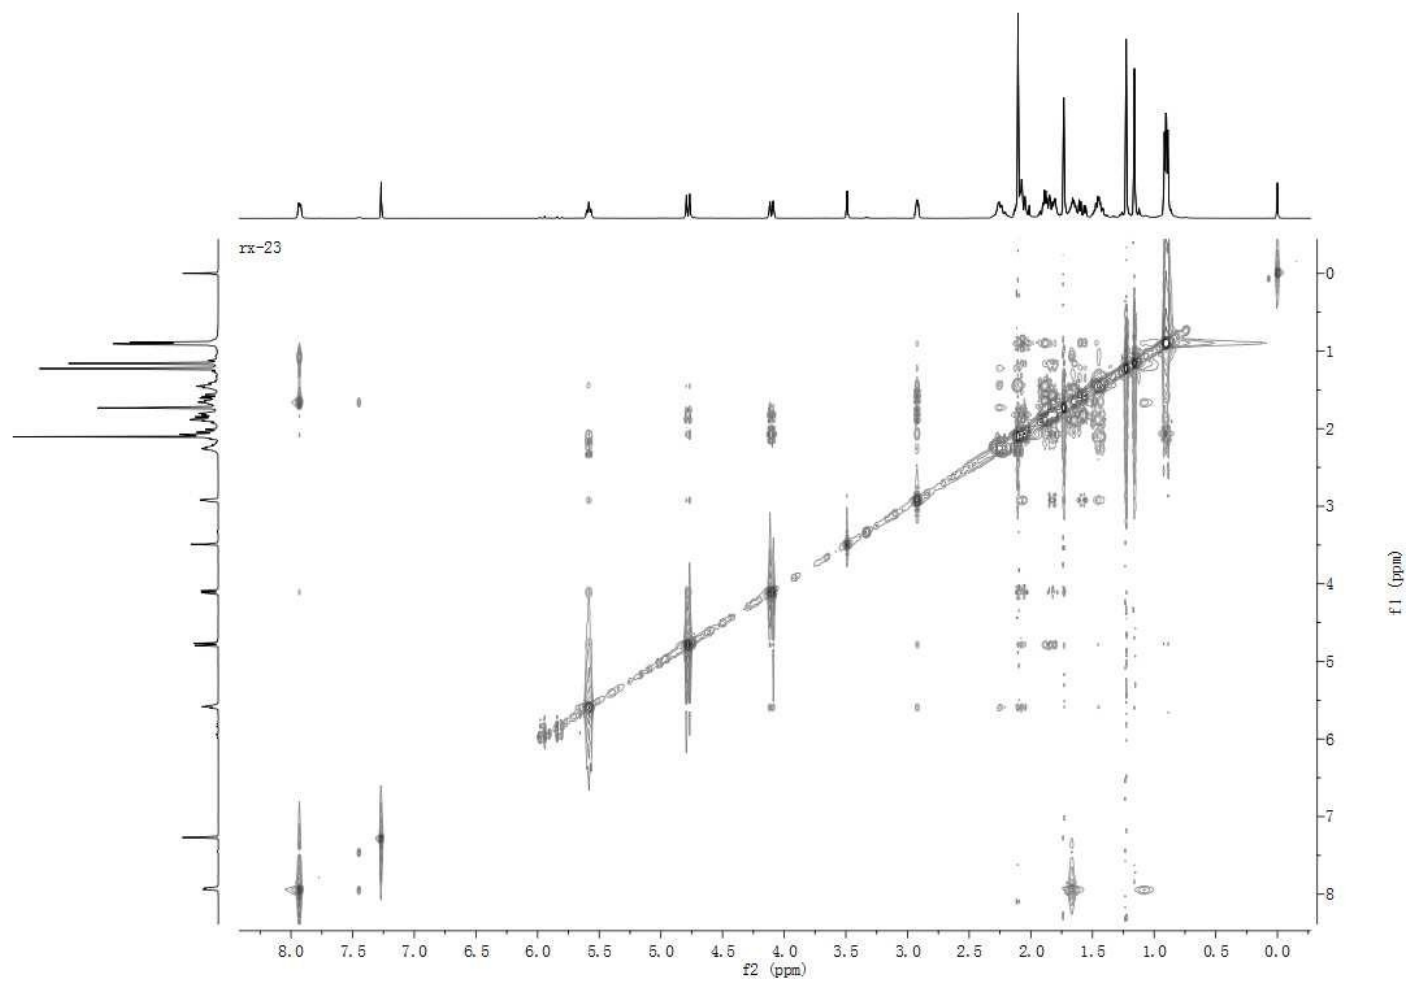

**Figure S29.** The NOESY Spectrum of Compound **4** in CDCl<sub>3</sub> (400 MHz)

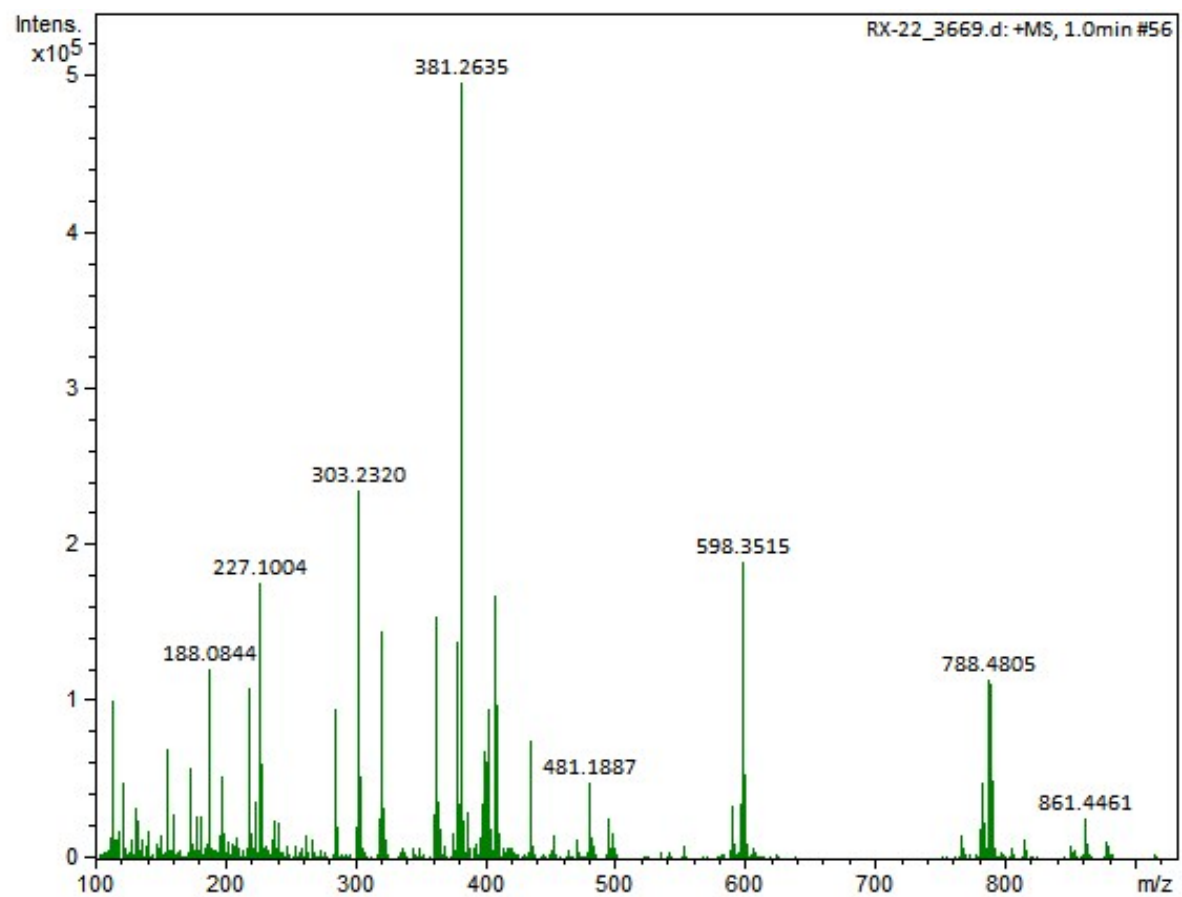

**Figure S30.** The HREIMS Spectroscopic Data of Compound **5**

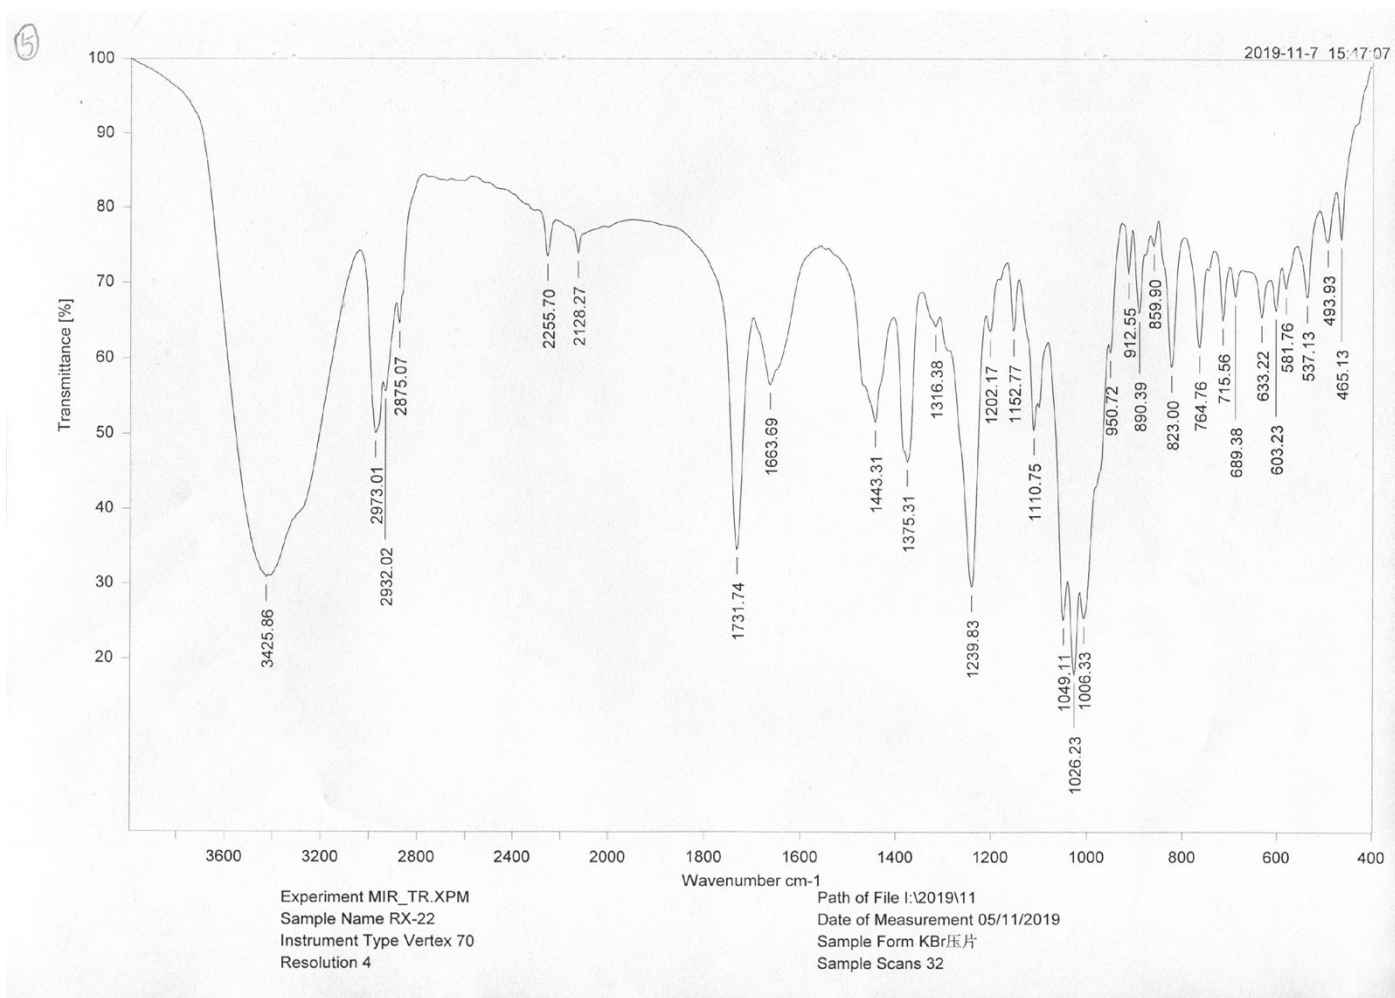

Figure S31. The IR Spectrum of Compound 5

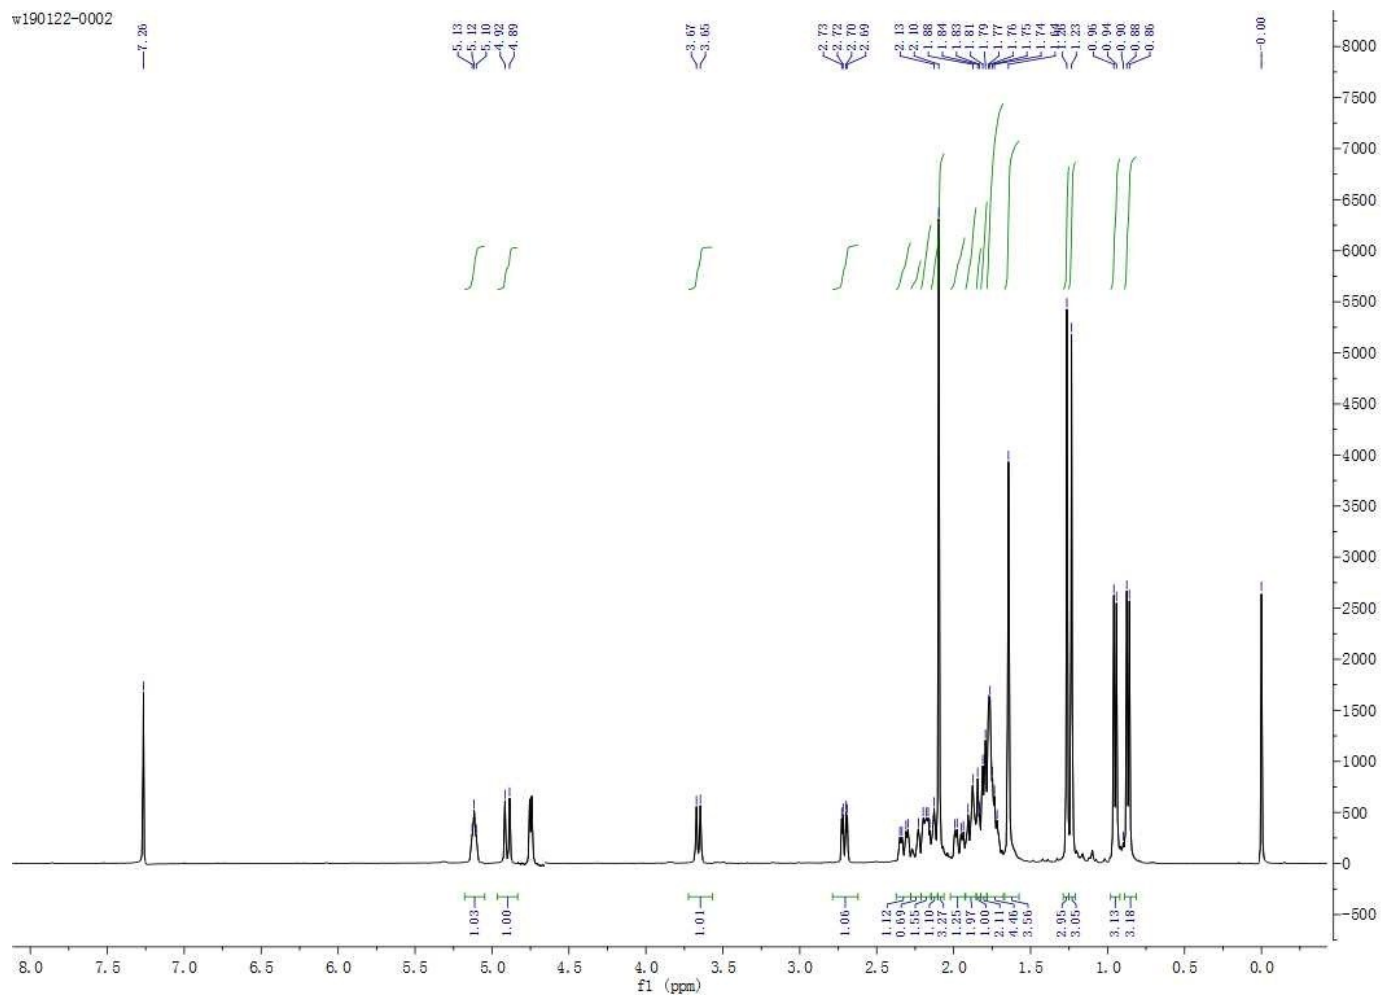

**Figure S32.** The  $^1\text{H}$  NMR Spectrum of Compound **5** in  $\text{CDCl}_3$  (400 MHz)

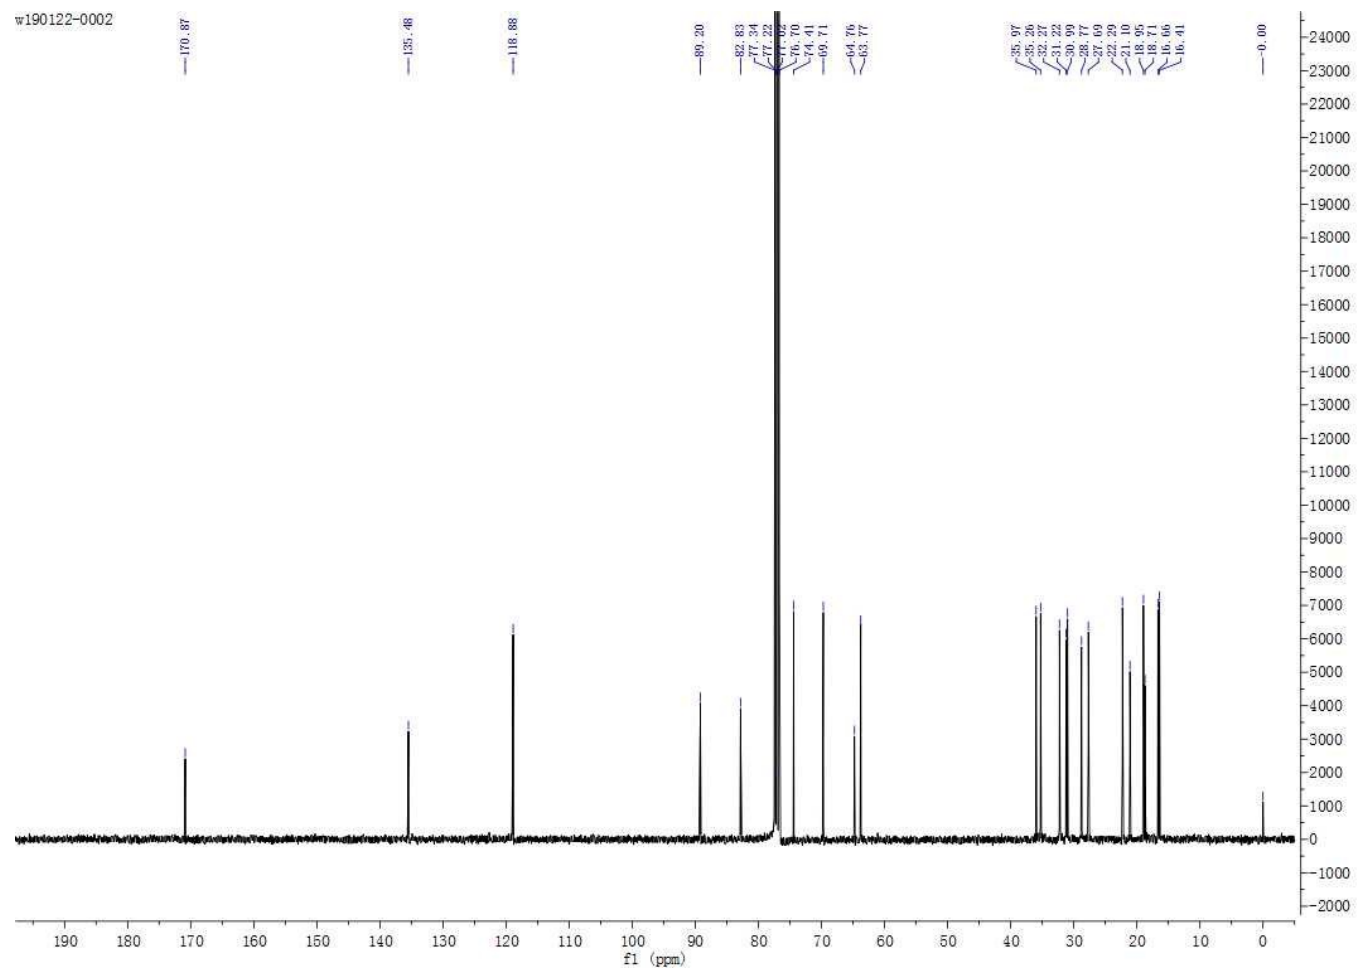

**Figure S33.** The  $^{13}\text{C}$  NMR Spectrum of Compound **5** in  $\text{CDCl}_3$  (100 MHz)

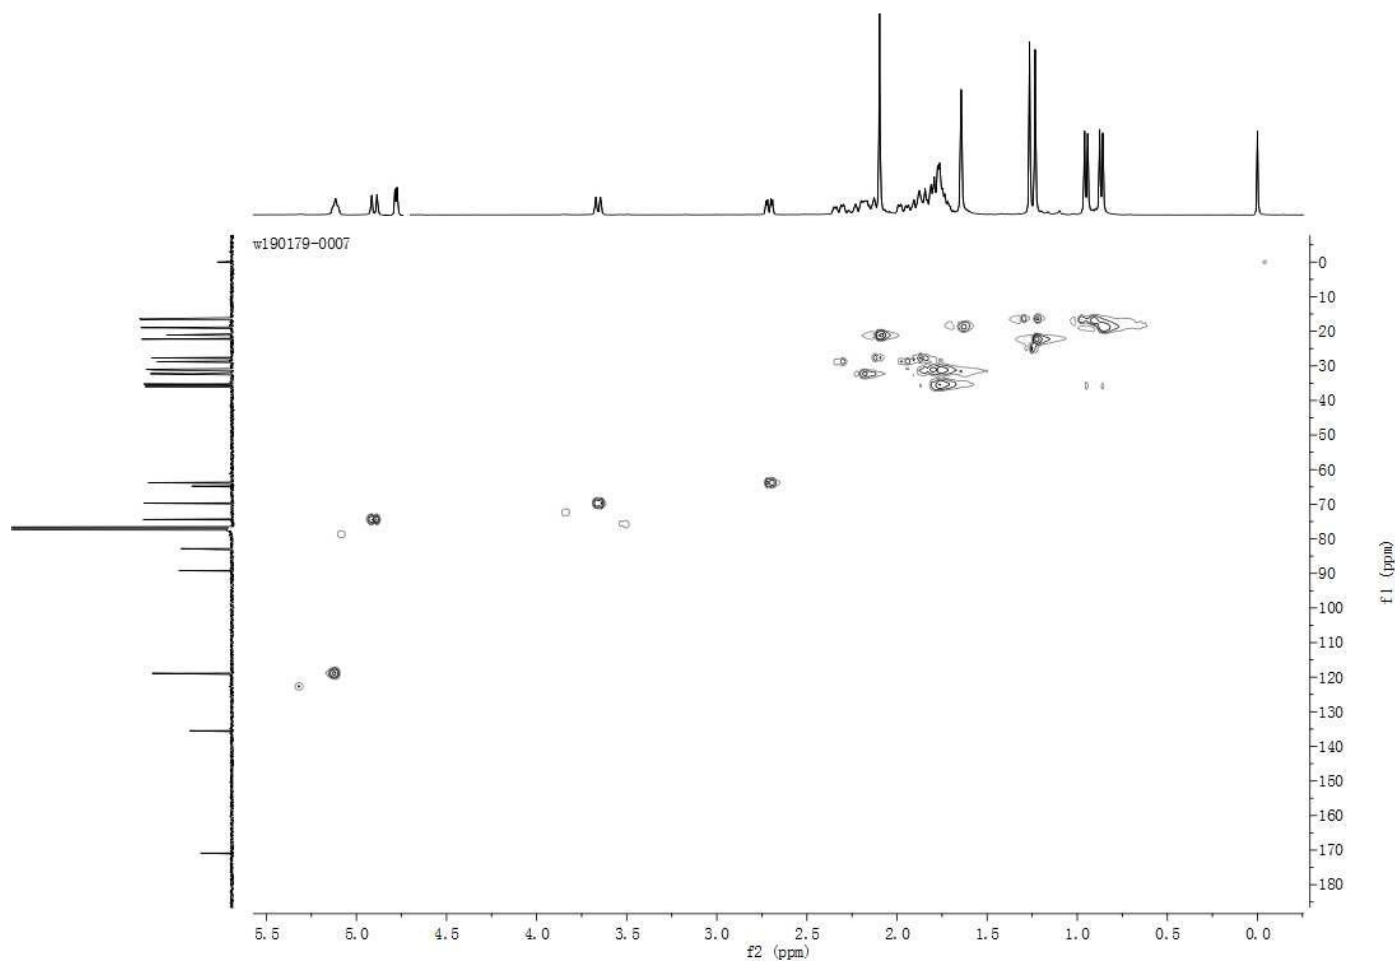

**Figure S34.** The HSQC Spectrum of Compound **5** in  $\text{CDCl}_3$  (400 MHz for  $^1\text{H}$ )

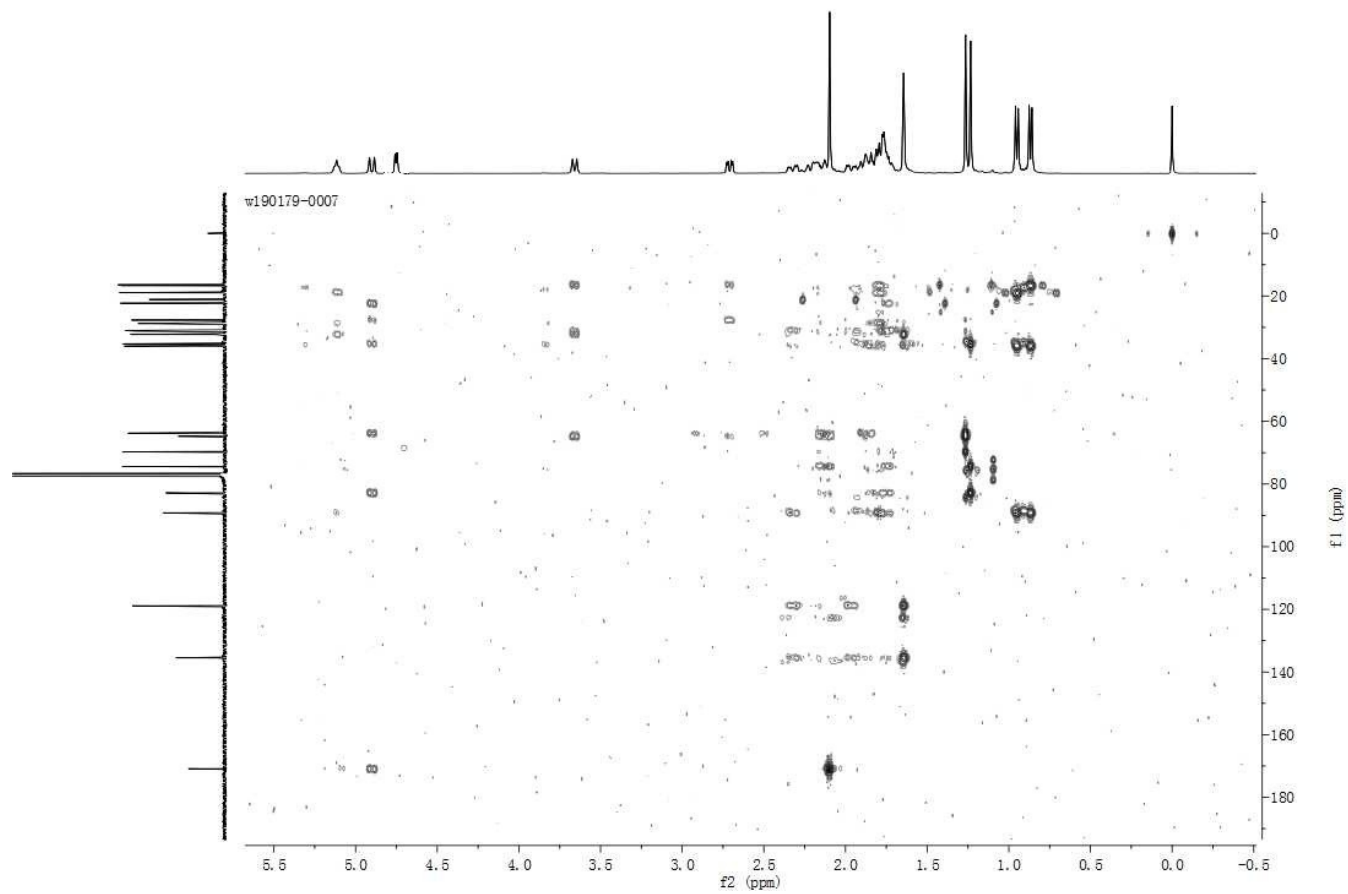

**Figure S35.** The HMBC Spectrum of Compound **5** in  $\text{CDCl}_3$  (400 MHz for  $^1\text{H}$ )

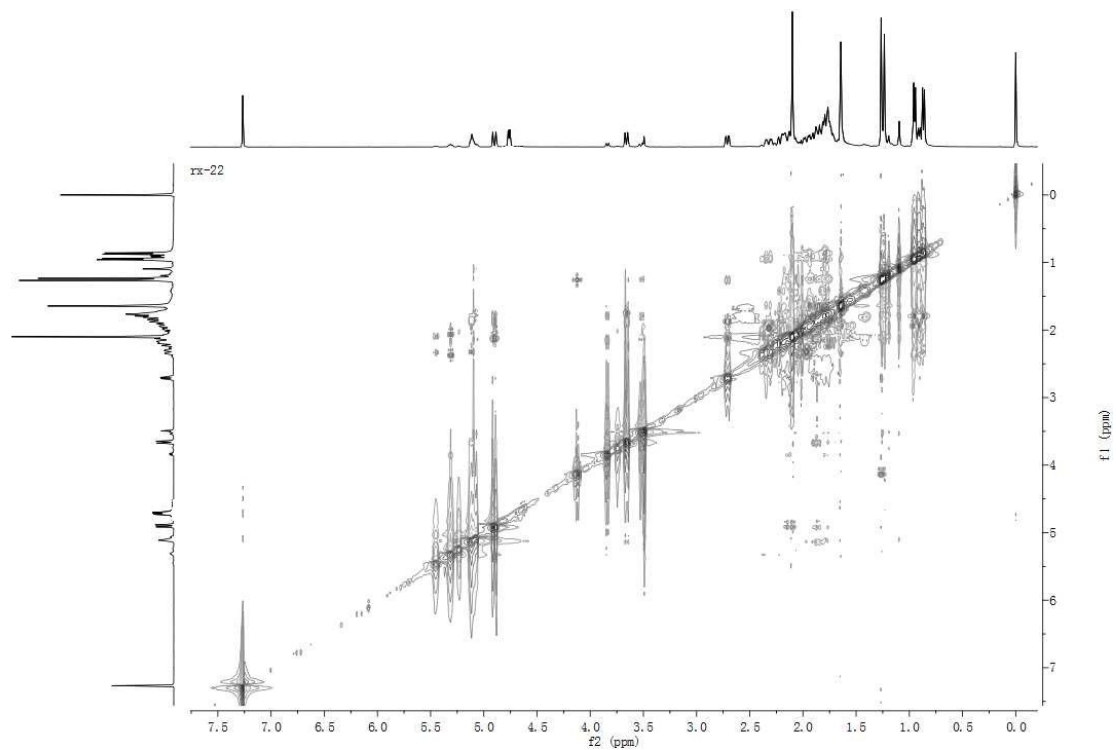

**Figure S36.** The NOESY Spectrum of Compound **5** in  $\text{CDCl}_3$  (400 MHz)



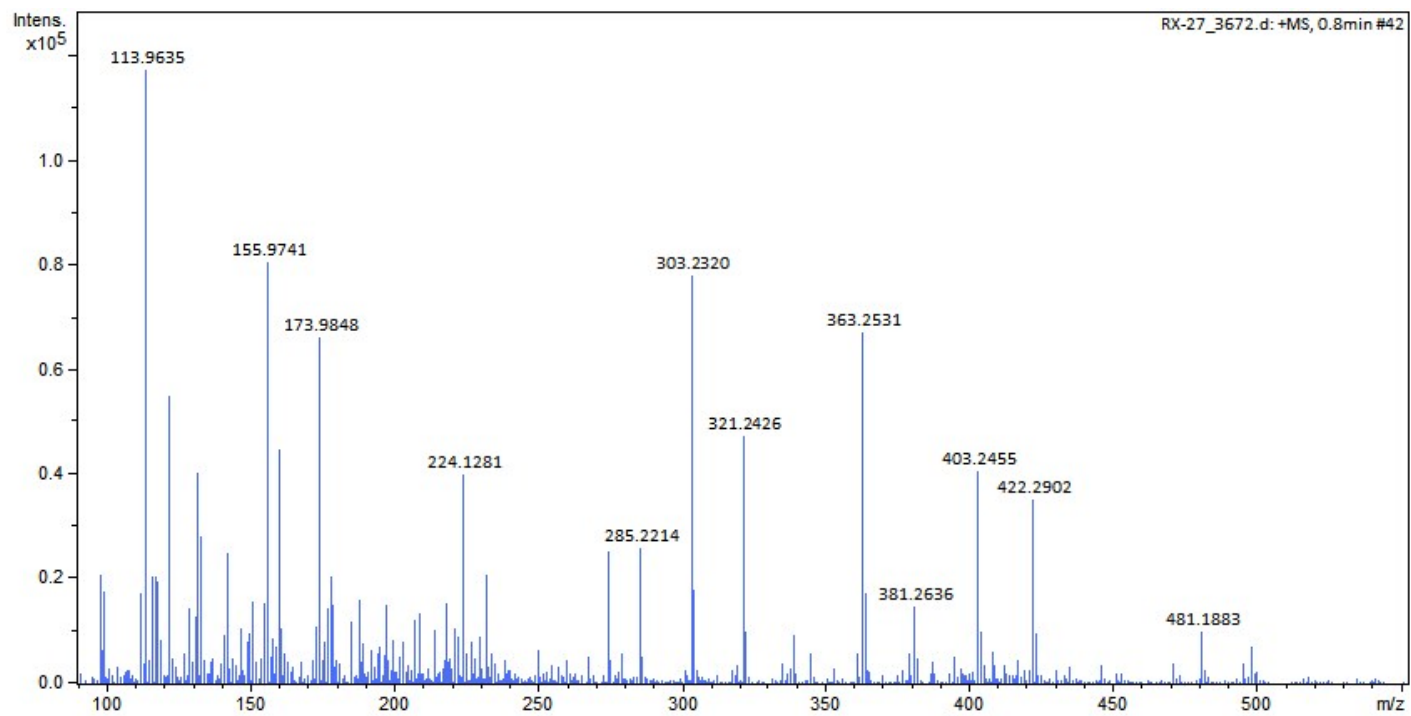

**Figure S37.** The HREIMS Spectroscopic Data of Compound 6

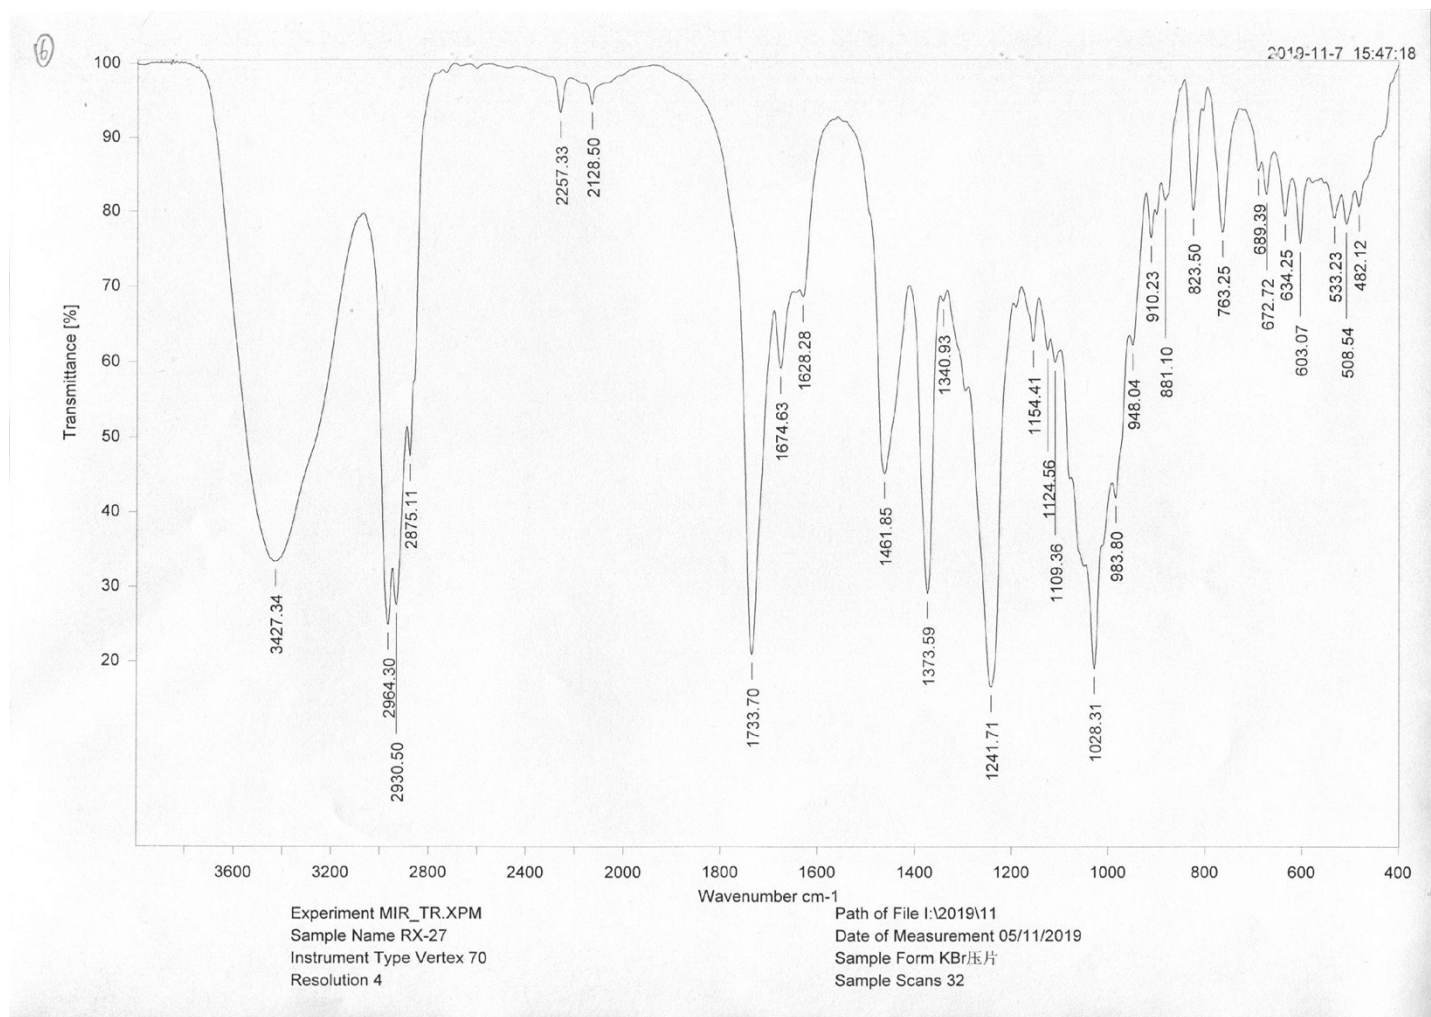

**Figure S38.** The IR Spectrum of Compound **6**

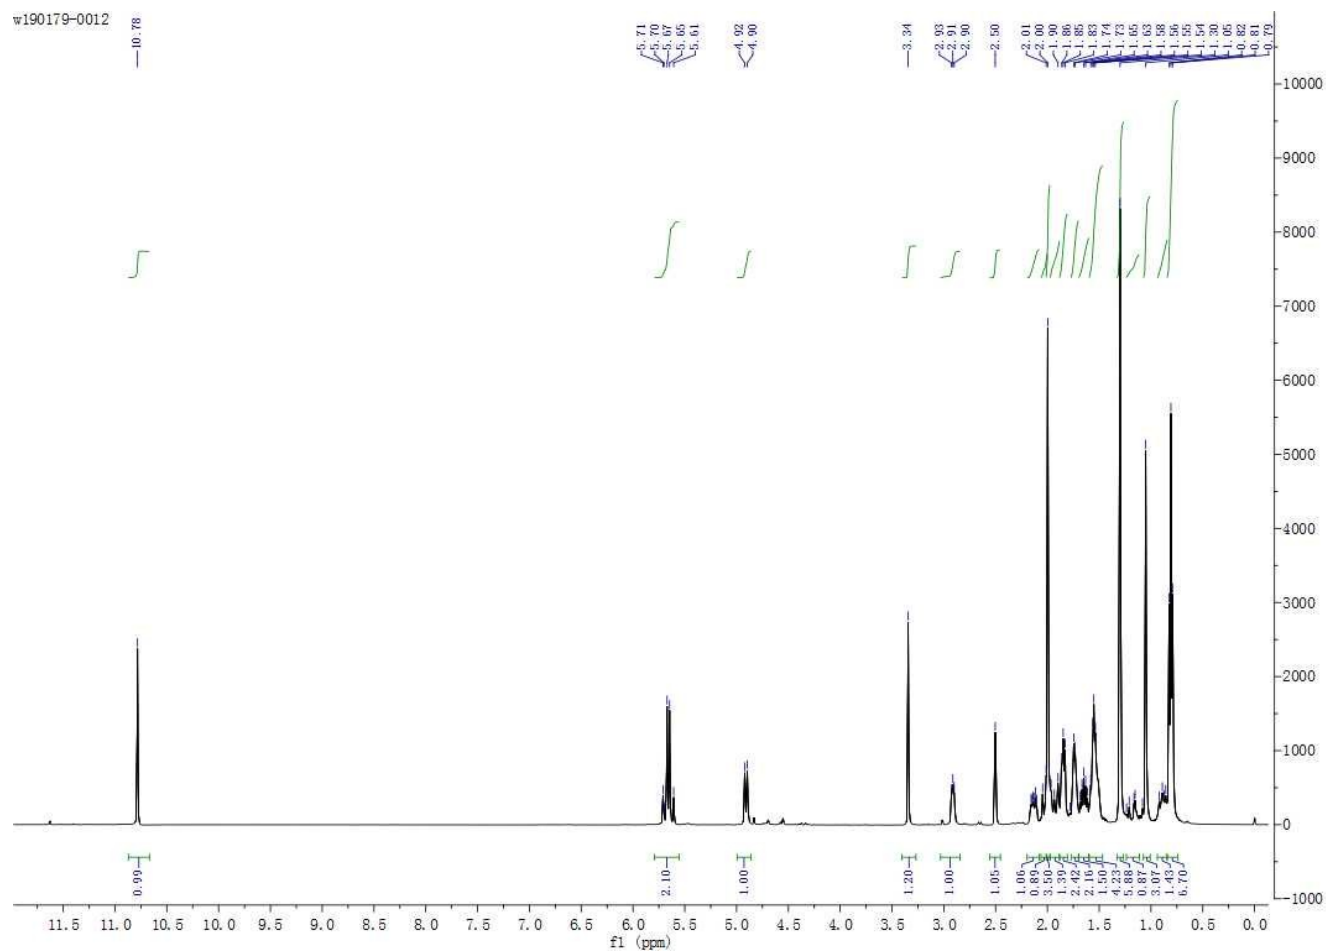

**Figure S39.** The  $^1\text{H}$  NMR Spectrum of Compound **6** in  $\text{DMSO-}d_6$  (400 MHz)

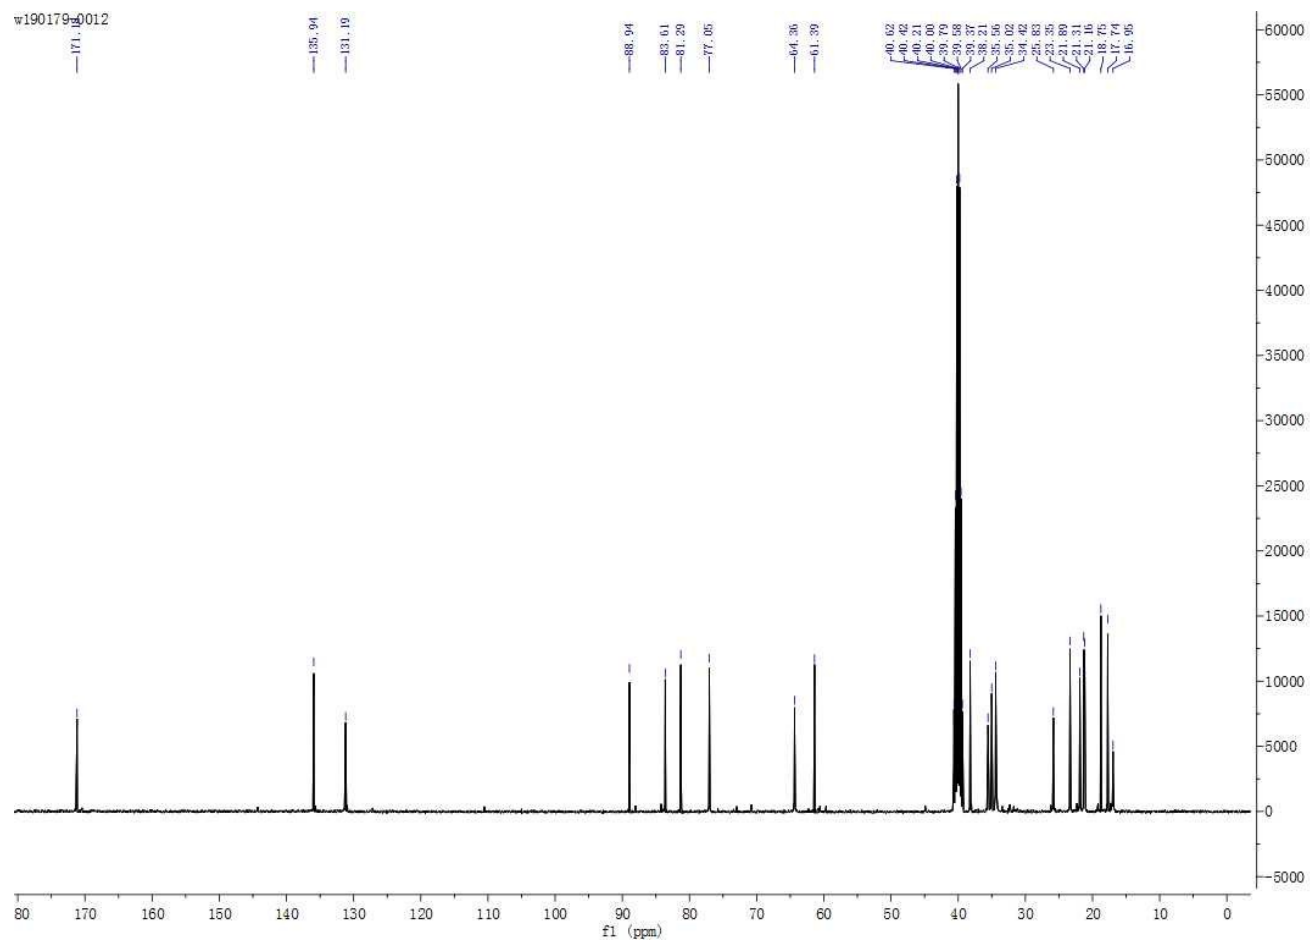

**Figure S40.** The  $^{13}\text{C}$  NMR Spectrum of Compound **6** in  $\text{DMSO-}d_6$  (100 MHz)

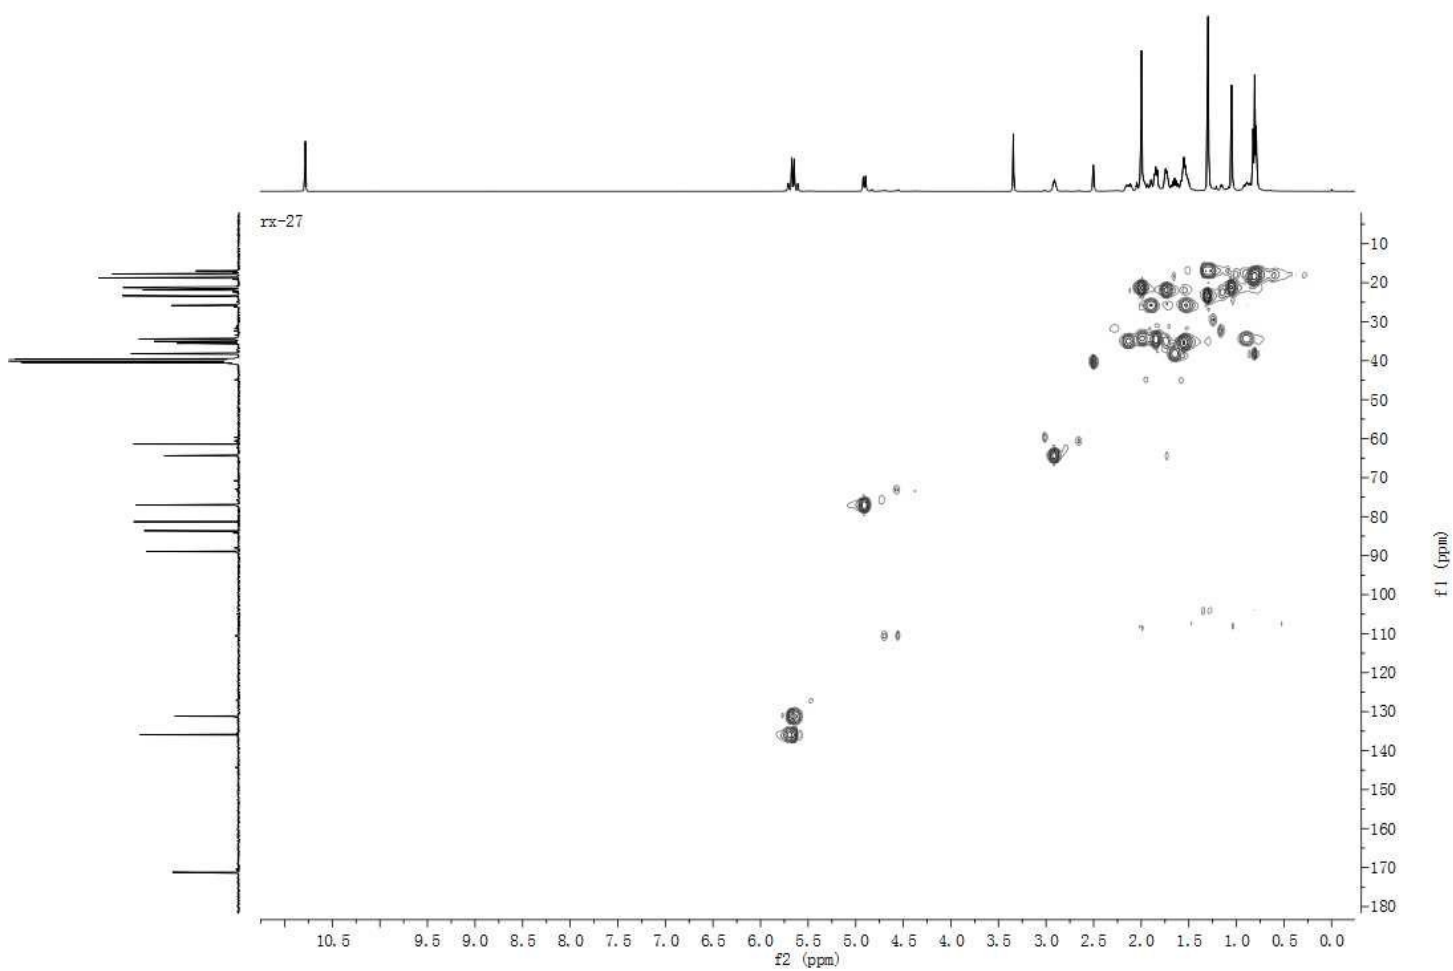

**Figure S41.** The HSQC Spectrum of Compound **6** in DMSO- $d_6$  (400 MHz for  $^1\text{H}$ )

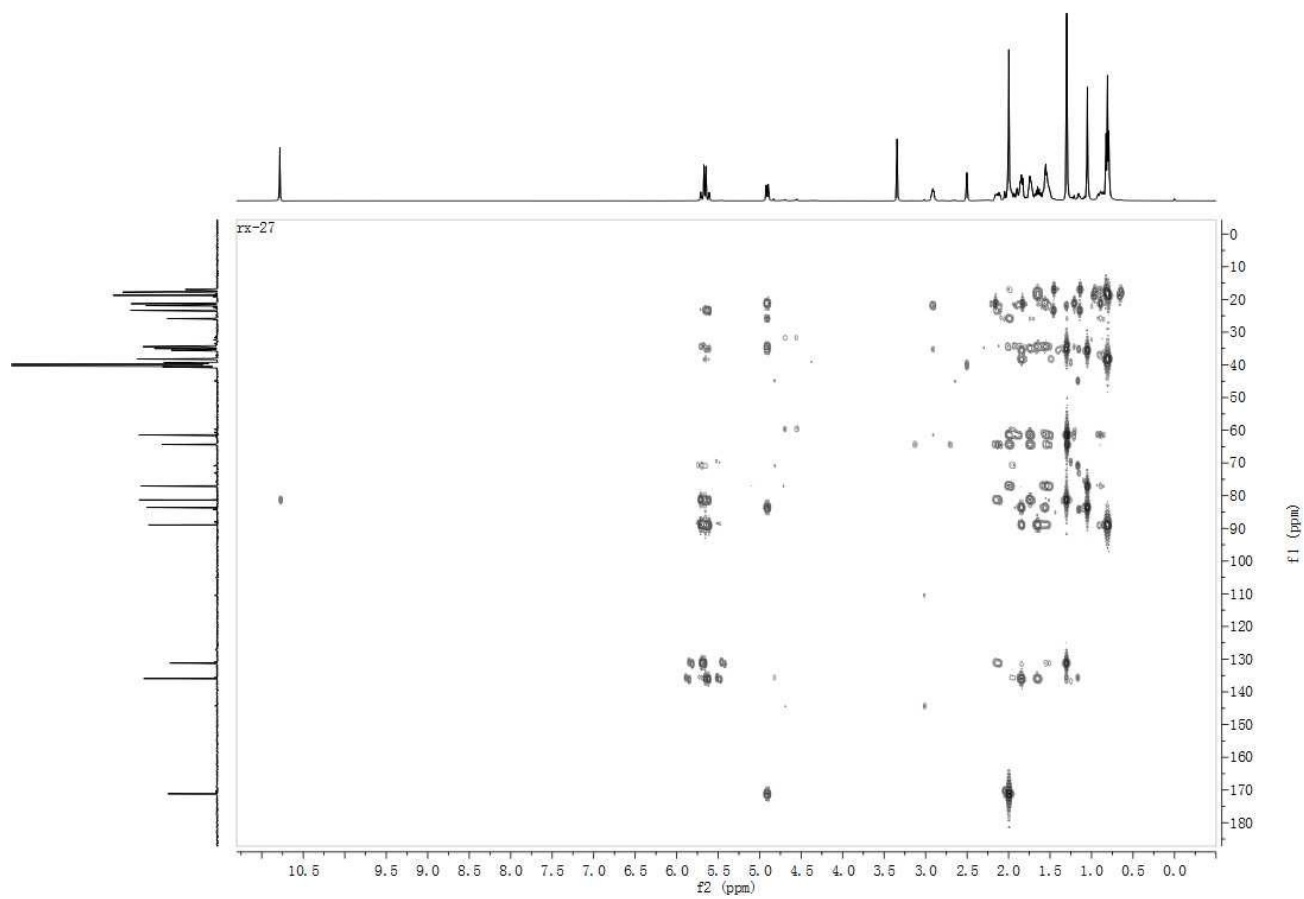

**Figure S42.** The HMBC Spectrum of Compound **6** in  $\text{DMSO-}d_6$  (400 MHz for  $^1\text{H}$ )

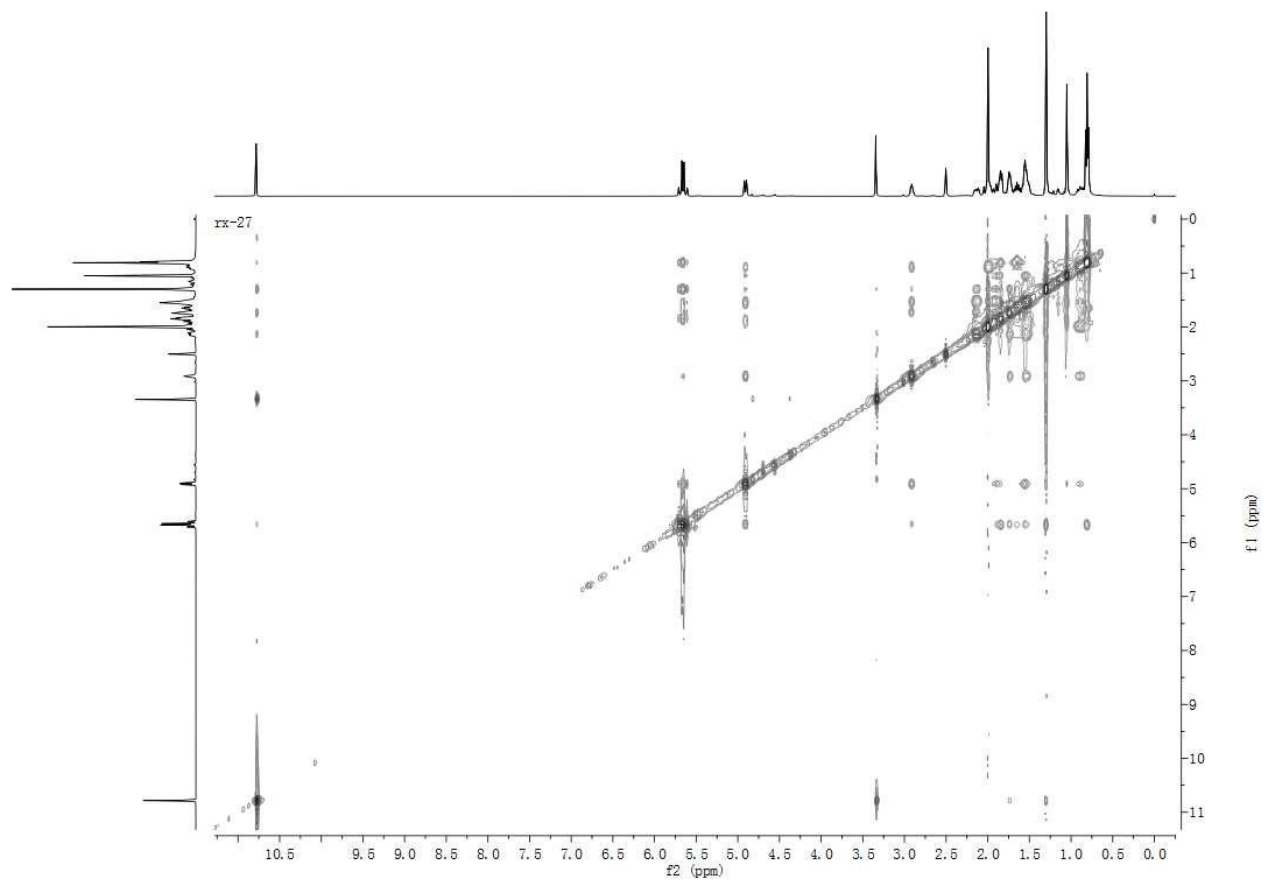

**Figure S43.** The NOESY Spectrum of Compound **6** in DMSO-*d*<sub>6</sub> (400 MHz)

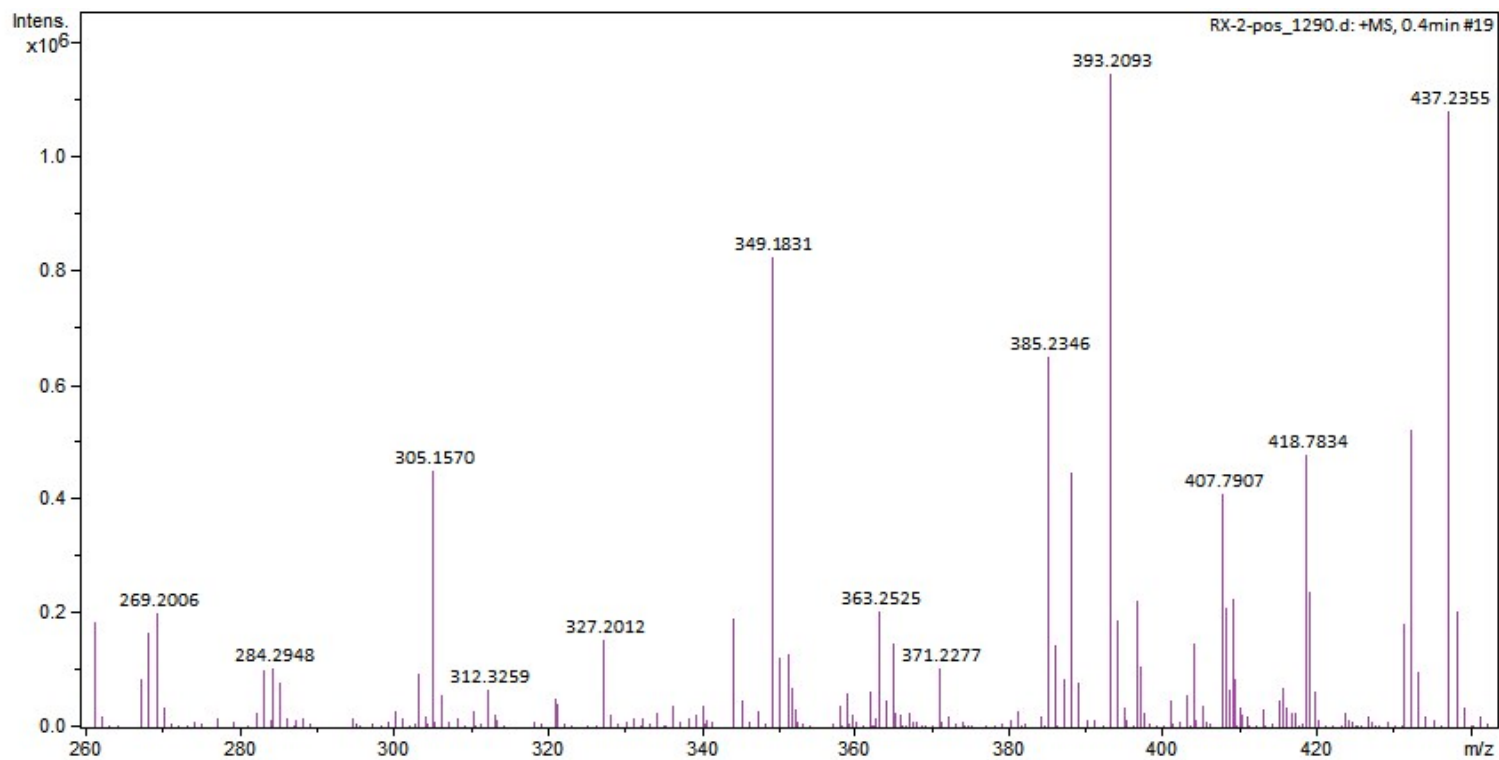

**Figure S44.** The HREIMS Spectroscopic Data of Compound 7



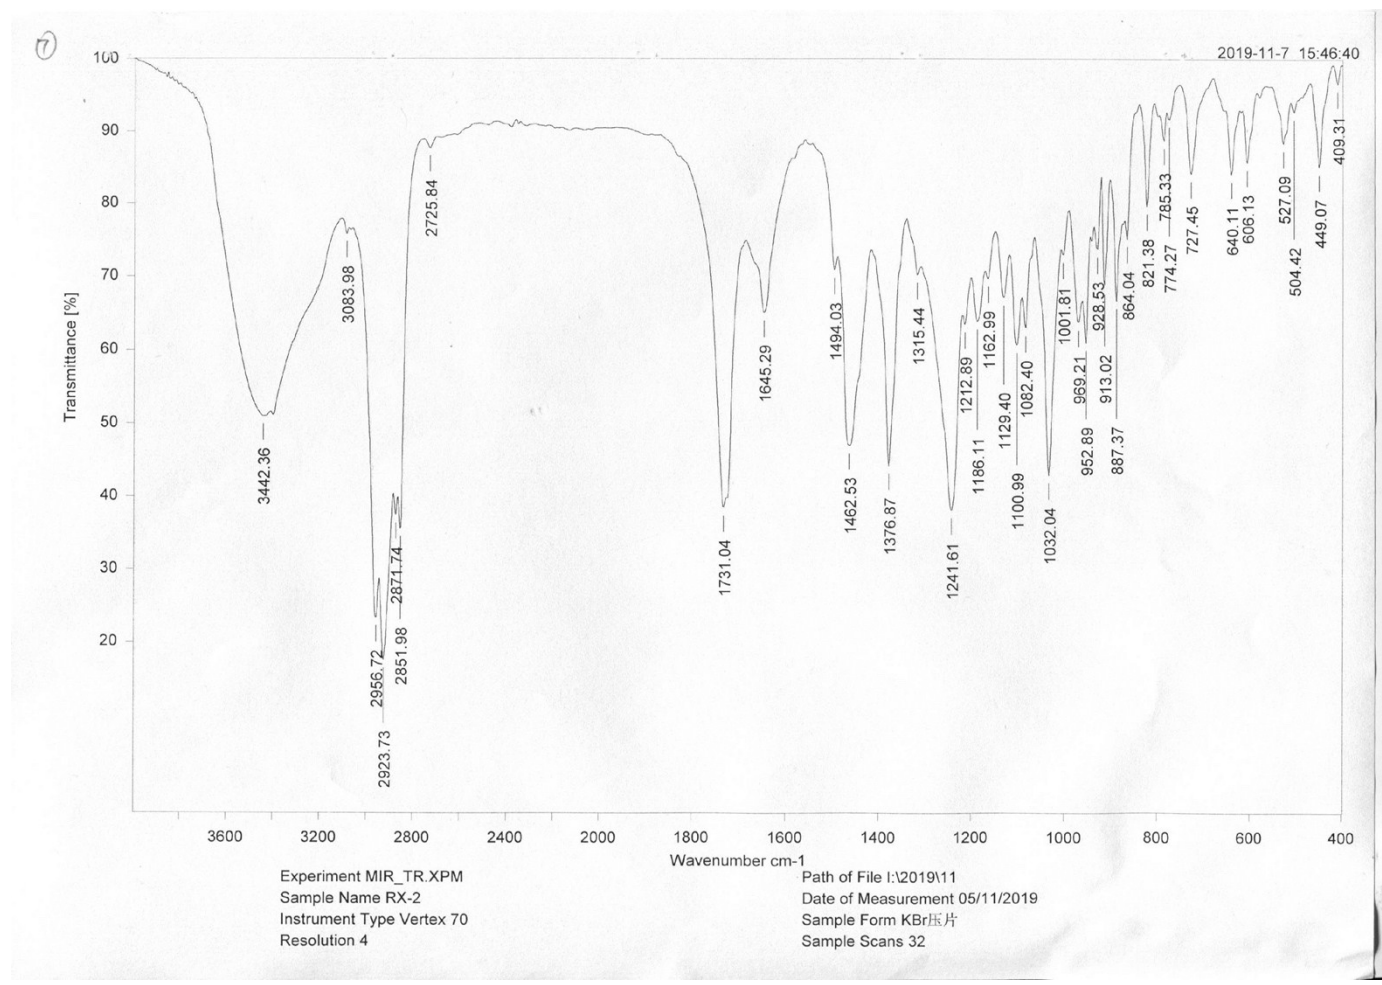

Figure S45. The IR Spectrum of Compound 7



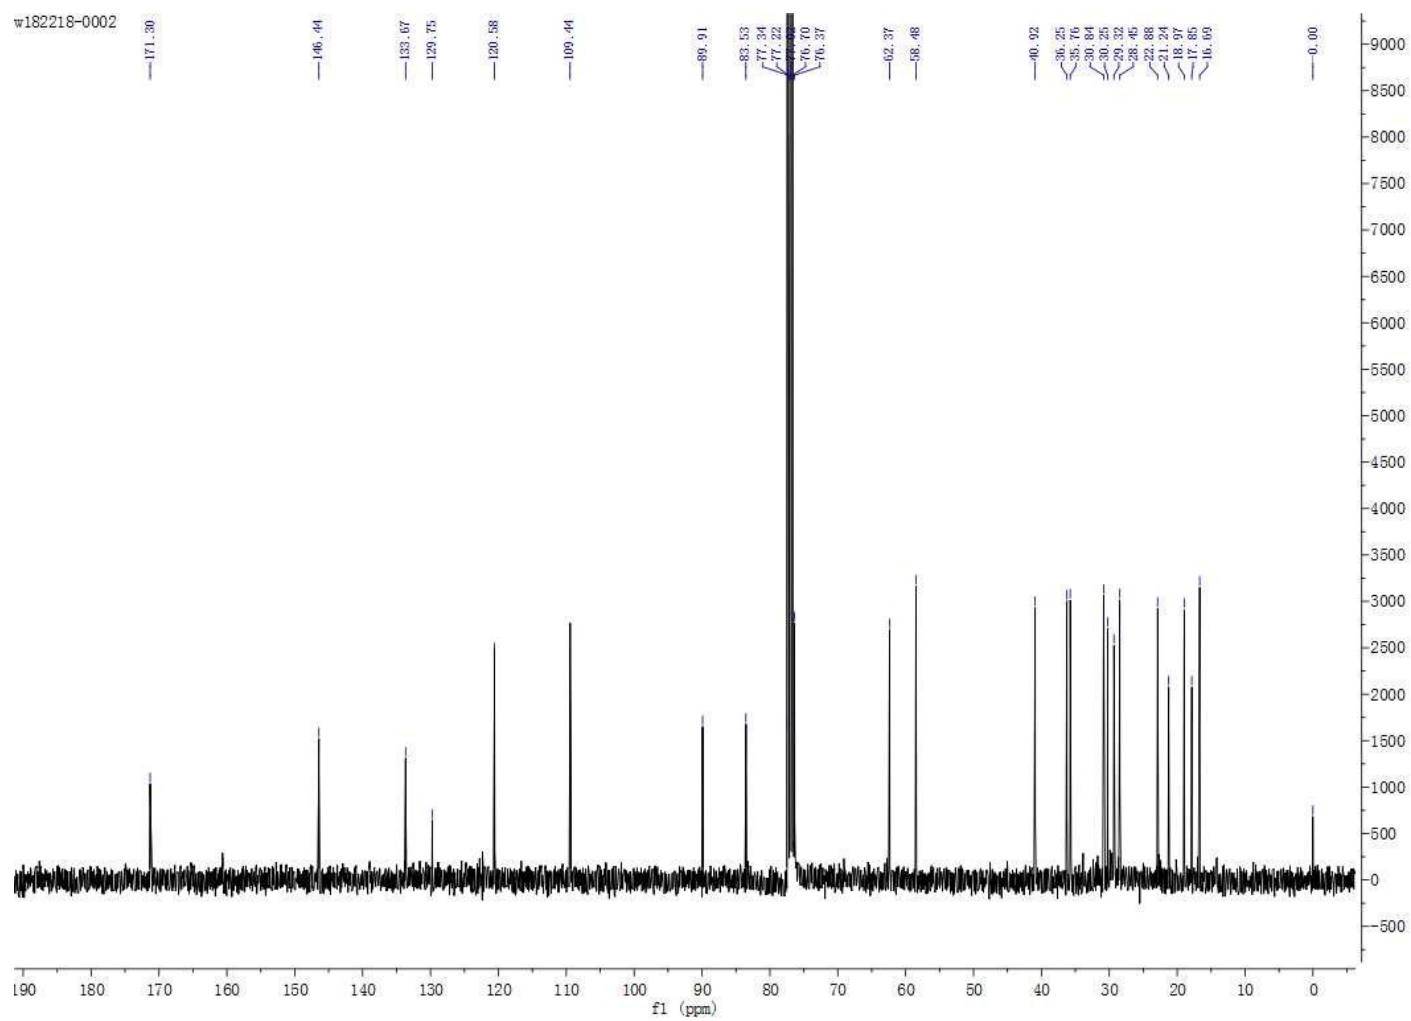

**Figure S47.** The  $^{13}\text{C}$  NMR Spectrum of Compound **7** in  $\text{CDCl}_3$  (100 MHz)

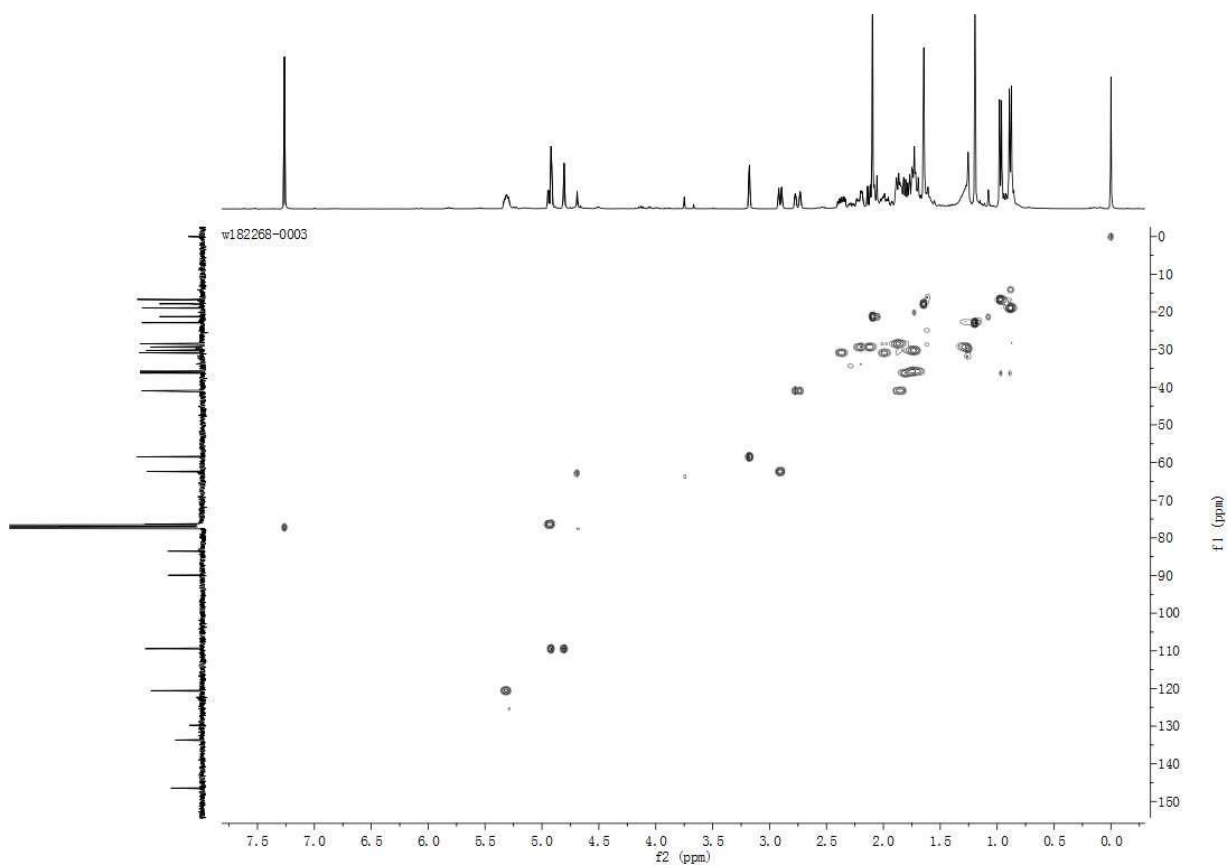

**Figure S48.** The HSQC Spectrum of Compound **7** in  $\text{CDCl}_3$  (400 MHz for  $^1\text{H}$ )

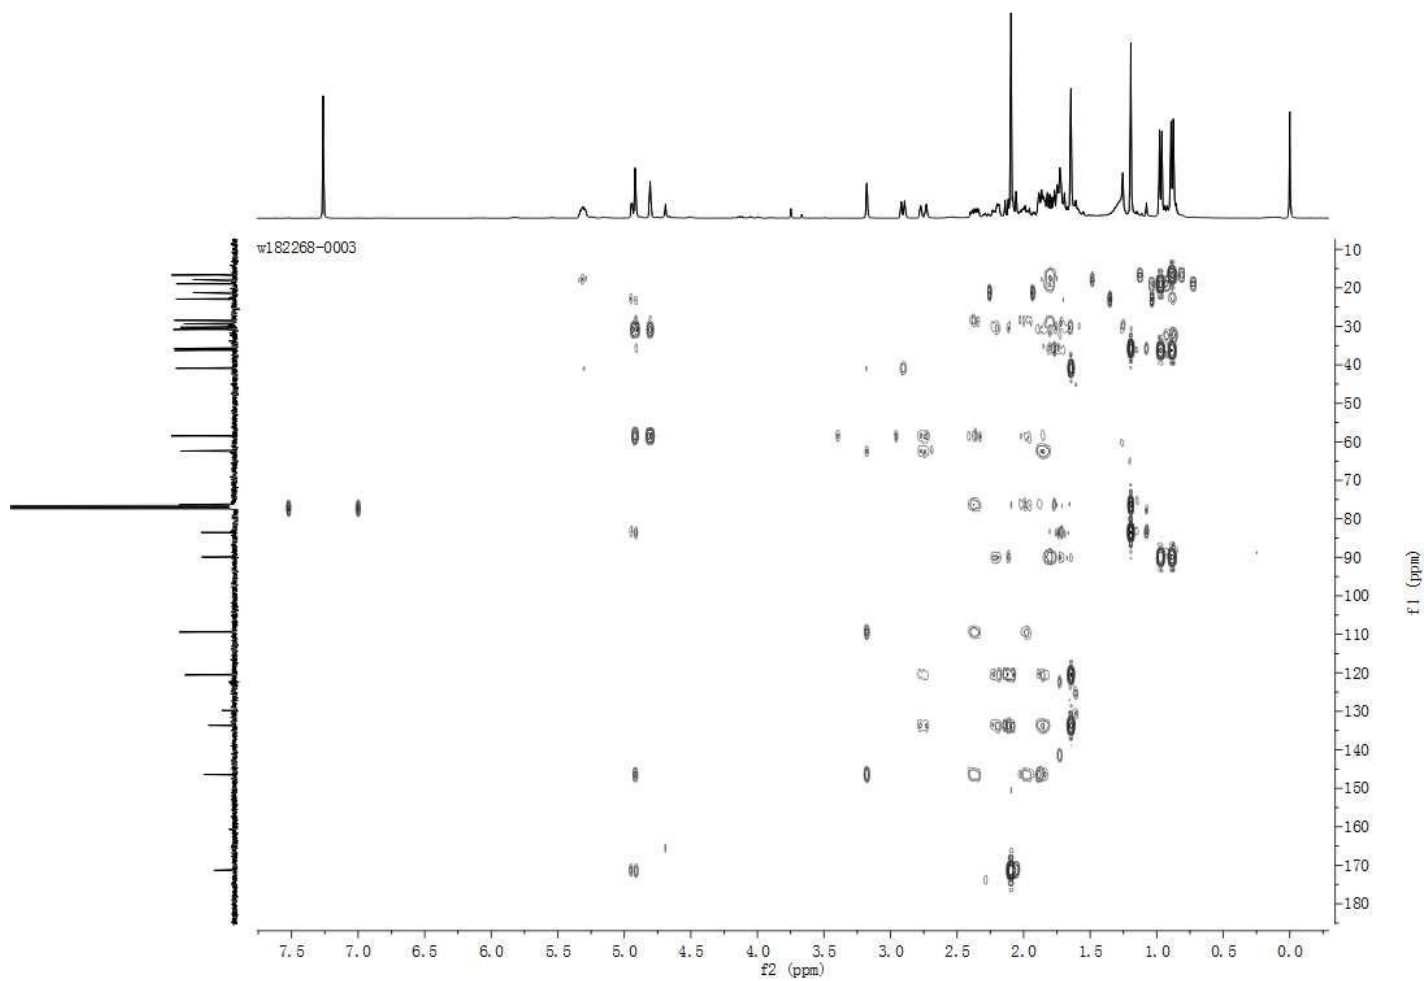

Figure S49. The HMBC Spectrum of Compound 7 in  $\text{CDCl}_3$  (400 MHz for  $^1\text{H}$ )

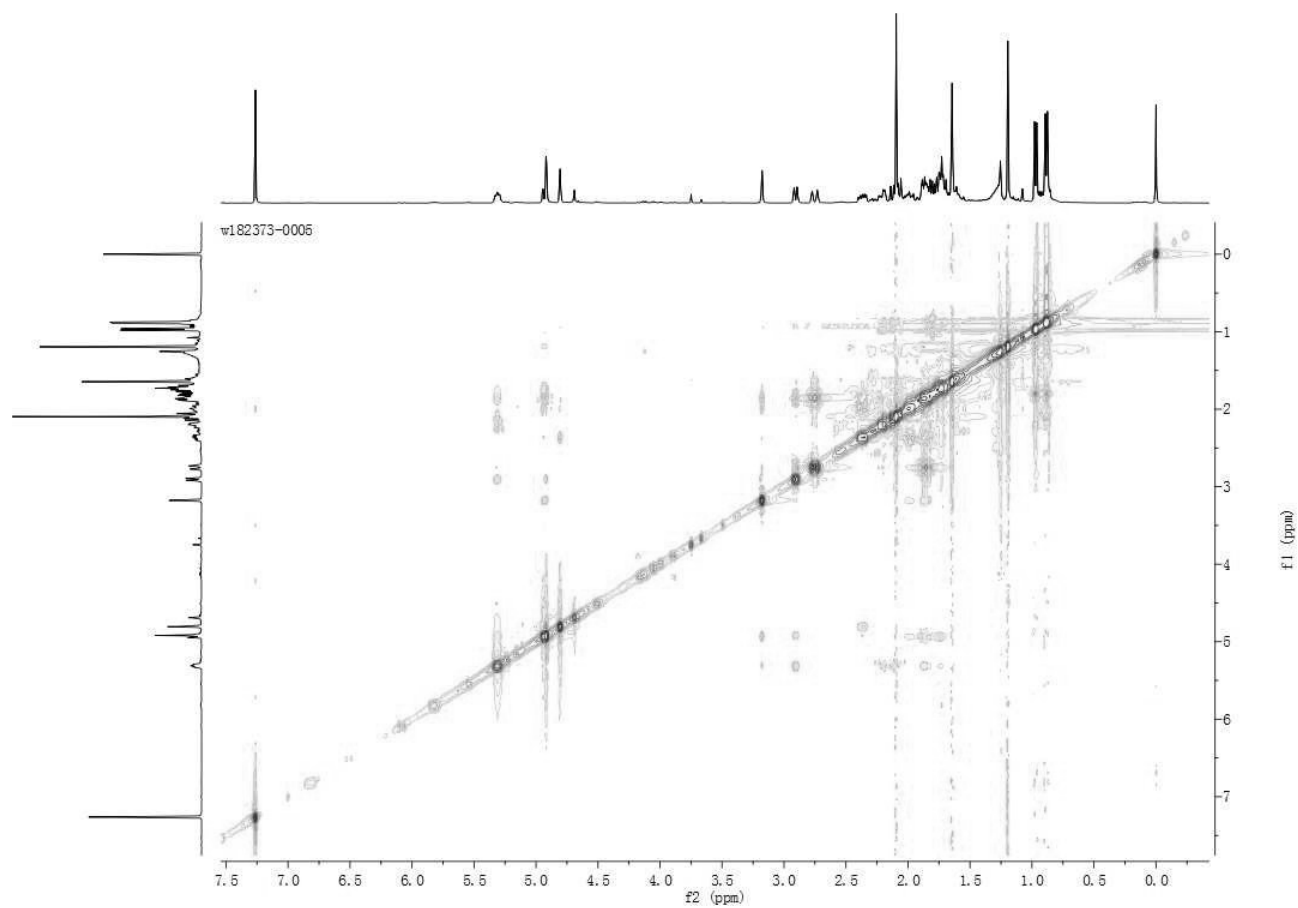

**Figure S50.** The NOESY Spectrum of Compound **7** in  $\text{CDCl}_3$  (400 MHz)

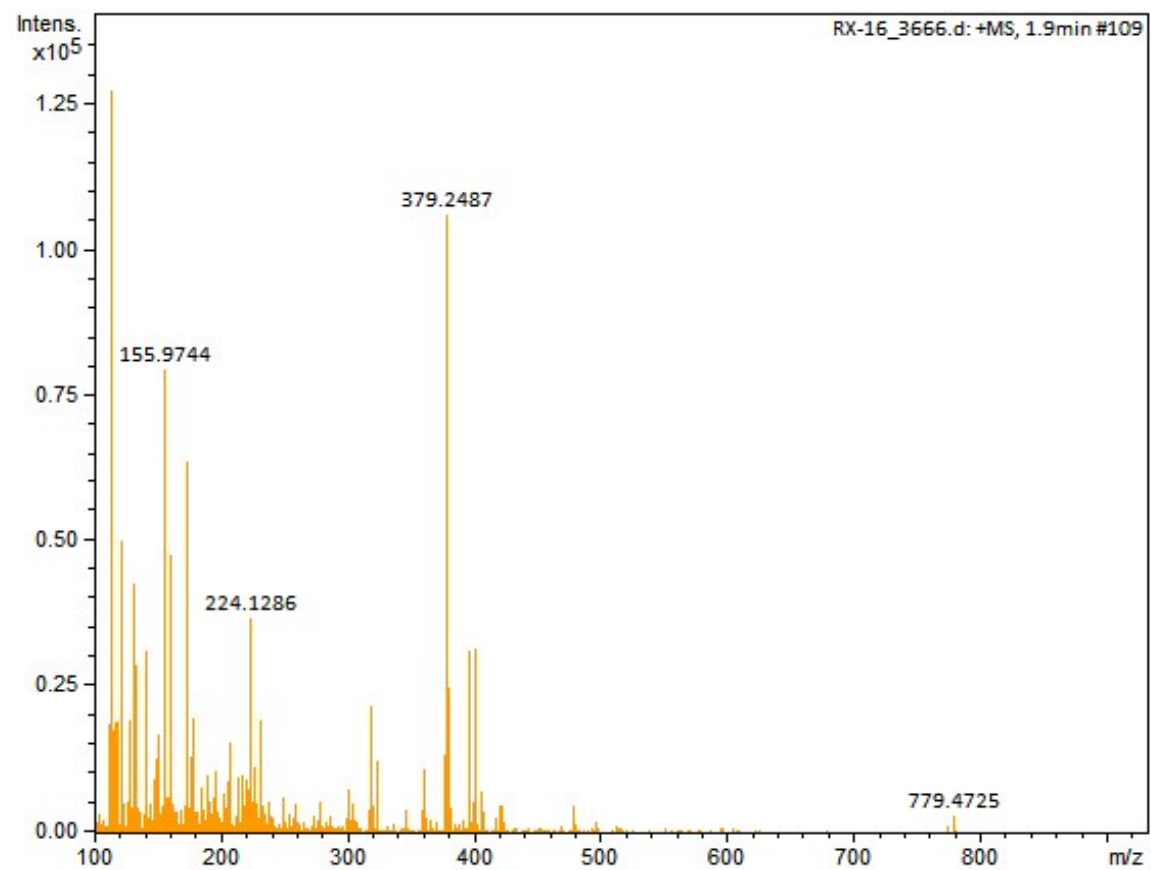

**Figure S51.** The HREIMS Spectroscopic Data of Compound **8**

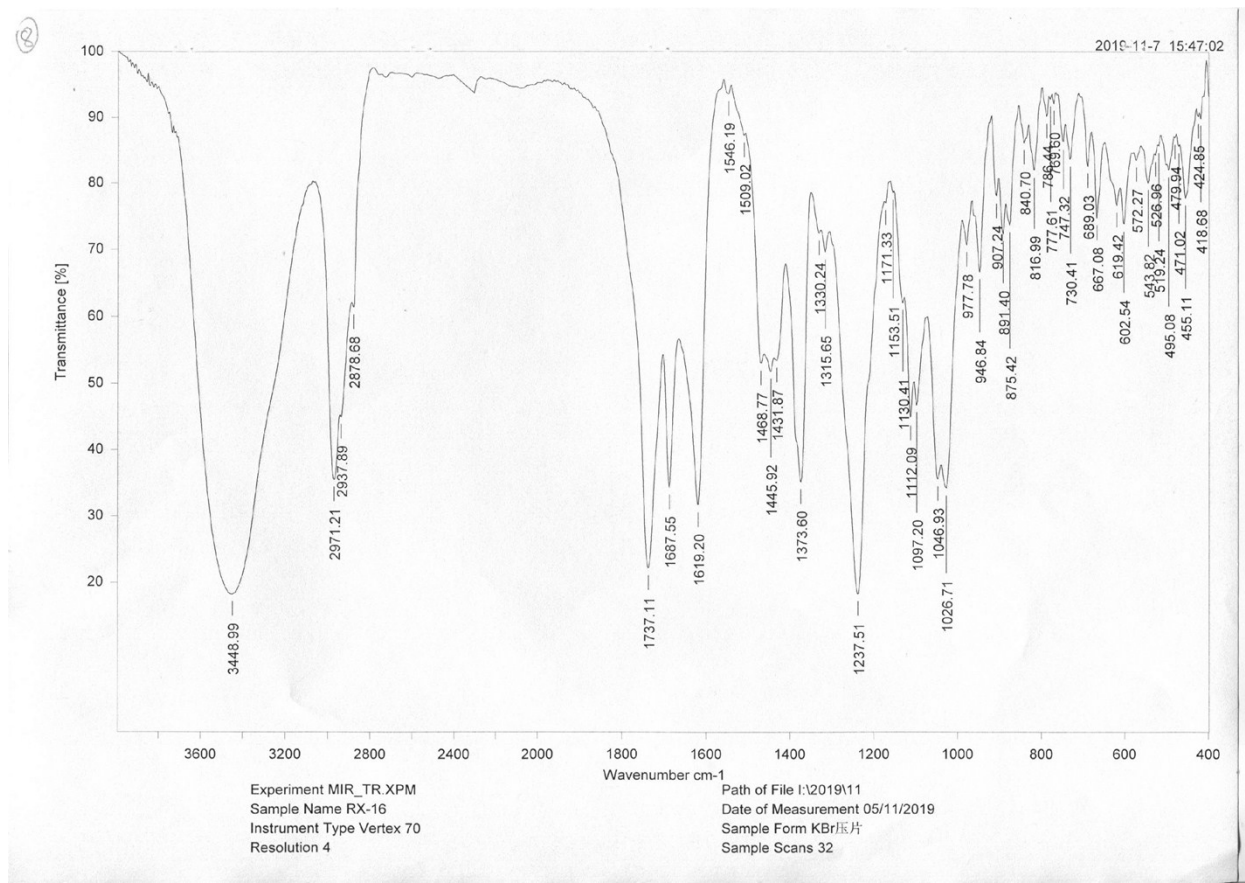

Figure S52. The IR Spectrum of Compound 8



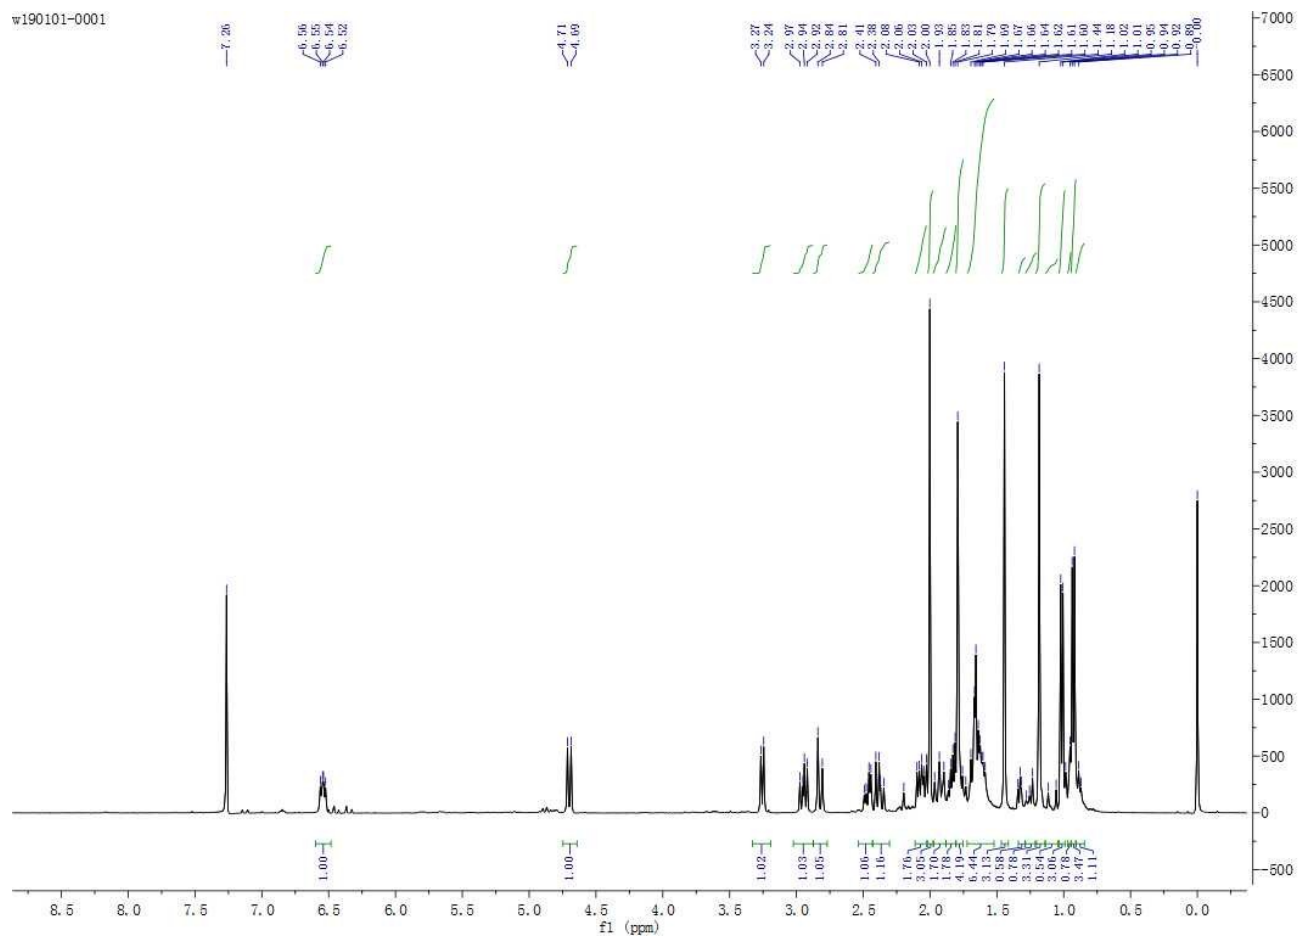

**Figure S53.** The  $^1\text{H}$  NMR Spectrum of Compound **8** in  $\text{CDCl}_3$  (400 MHz)

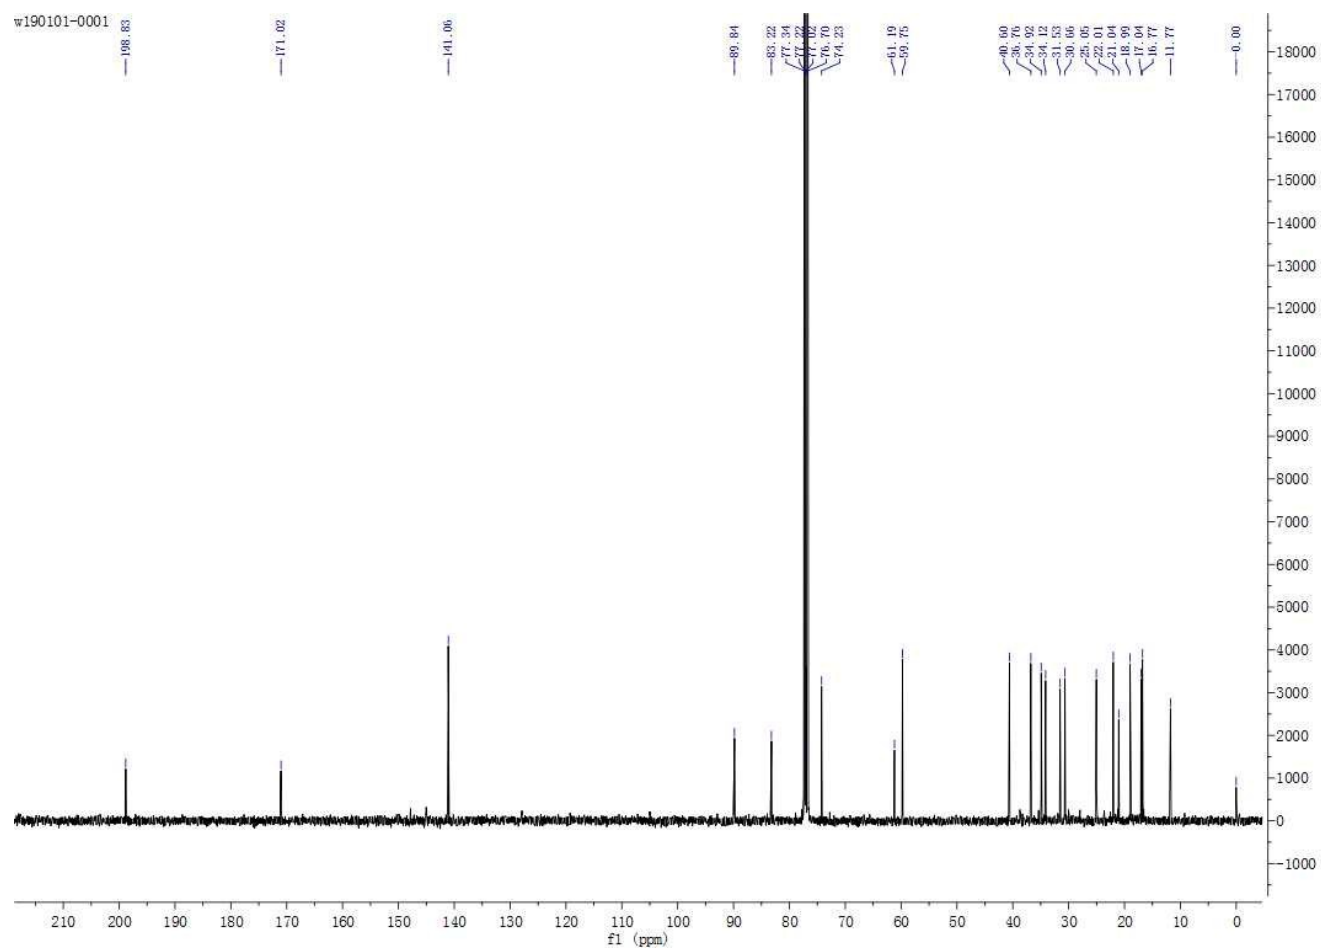

**Figure S54.** The  $^{13}\text{C}$  NMR Spectrum of Compound **8** in  $\text{CDCl}_3$  (100 MHz)

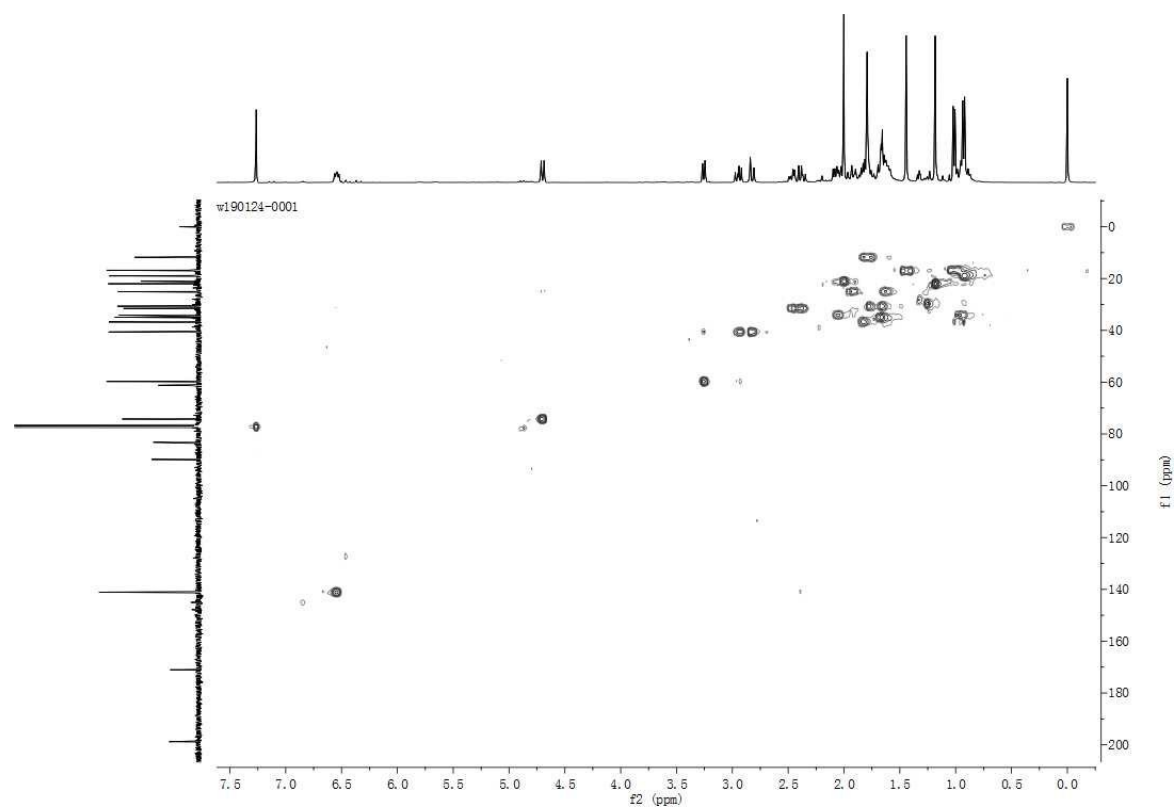

**Figure S55.** The HSQC Spectrum of Compound **8** in  $\text{CDCl}_3$  (400 MHz for  $^1\text{H}$ )

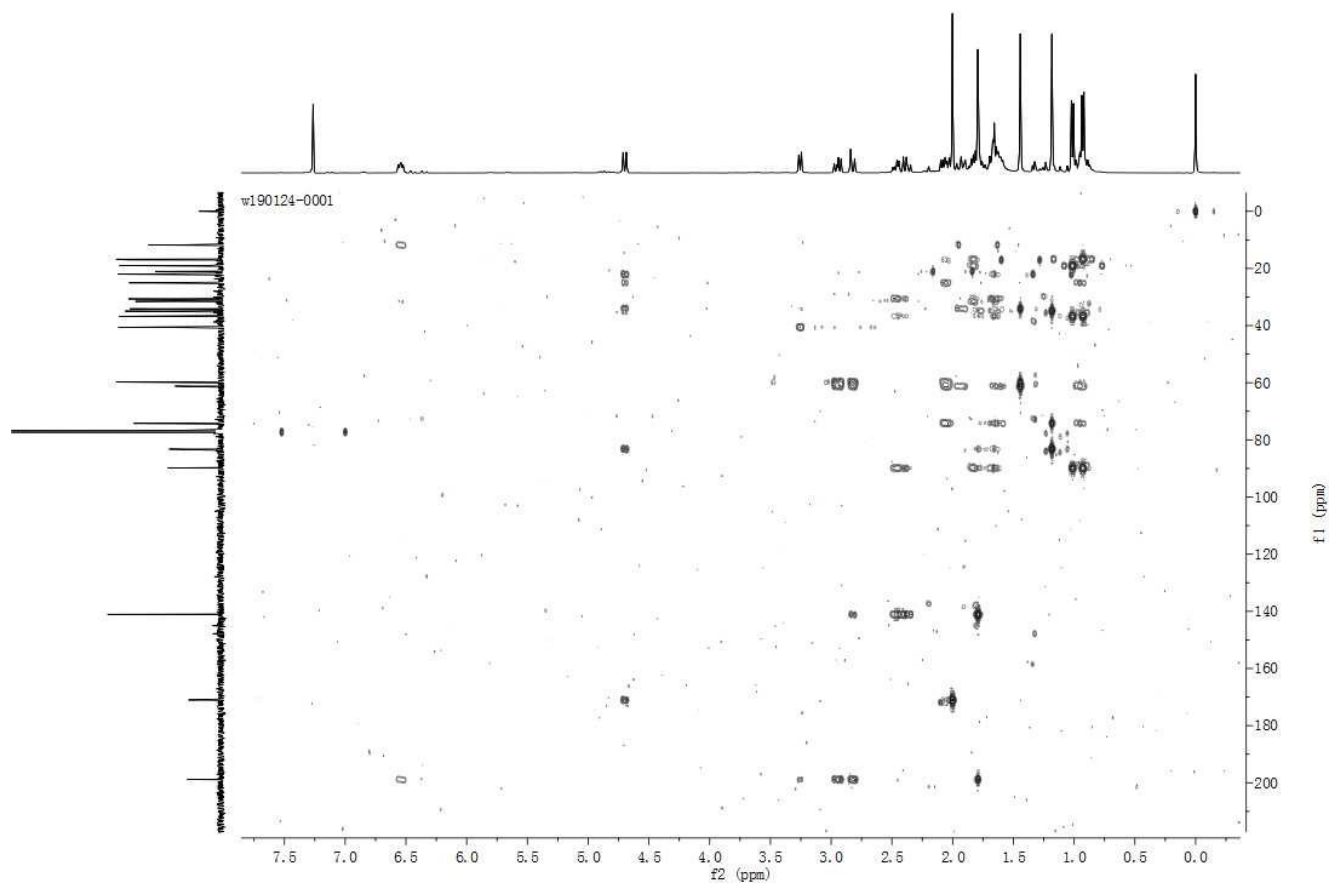

**Figure S56.** The HMBC Spectrum of Compound **8** in  $\text{CDCl}_3$  (400 MHz for  $^1\text{H}$ )

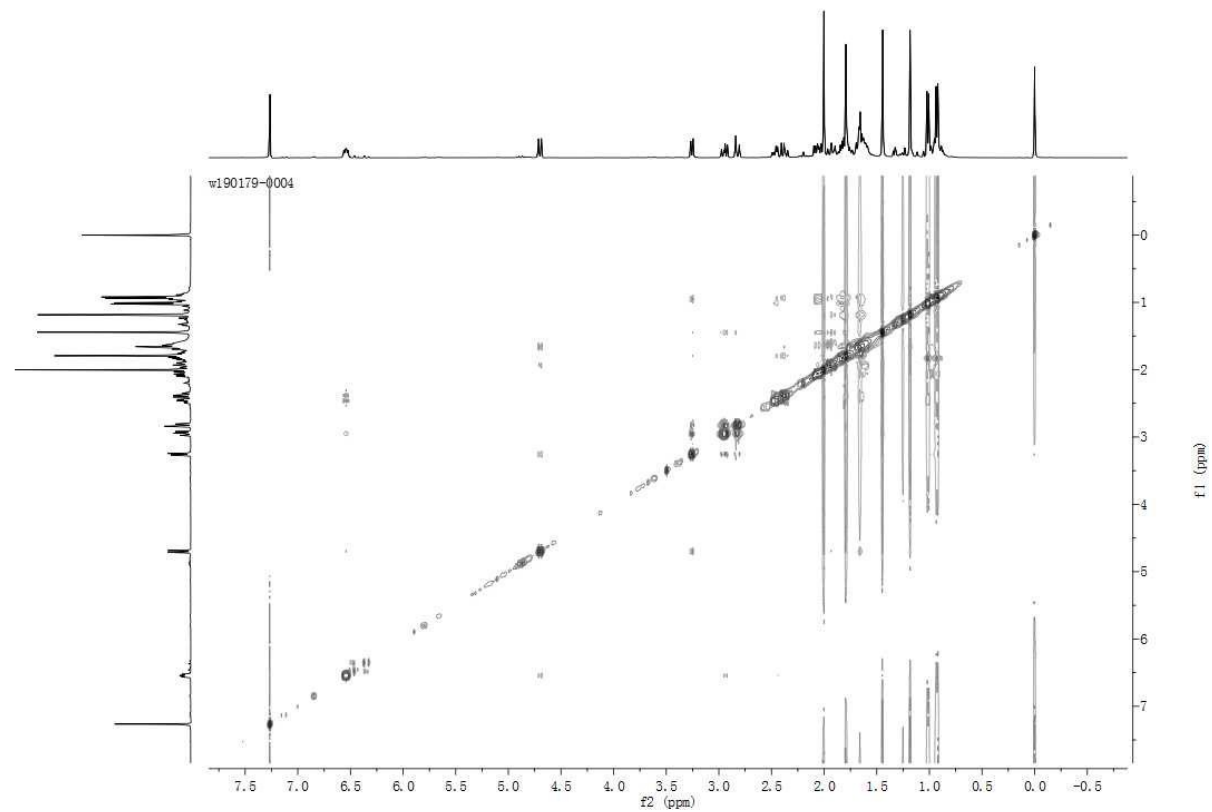

**Figure S57.** The NOESY Spectrum of Compound **8** in  $\text{CDCl}_3$  (400 MHz)
